# Supplementary material
Source: PubMed Central journal article supplement (PMC3038731)

# **Predicting and Optimizing Asymmetric Catalyst Performance Using the Principles of Experimental Design and Steric Parameters**

## **Supporting Information**

### **Table of Contents**

|                                                                  |     |
|------------------------------------------------------------------|-----|
| General Information                                              | S2  |
| Ligand Characterization                                          | S2  |
| Experiment Description for the Allylation of Benzaldehyde        | S10 |
| Experiment Description for the Allylation of Acetophenone        | S11 |
| Experiment Description for the Allylation of Methyl Ethyl Ketone | S12 |
| Determination of Enantioselectivity                              | S13 |
| Graphical Representations                                        | S17 |
| Model Development and Statistical Analysis                       | S21 |
| References                                                       | S40 |
| NMR Spectra                                                      | S41 |

**General Information:** Unless otherwise noted, all reactions were performed under a nitrogen atmosphere with stirring. Toluene, dichloromethane, dichloroethane and THF were dried before use by passing through a column of activated alumina. Methanol was distilled from magnesium methoxide. Triethylamine was distilled from CaH<sub>2</sub>. Benzaldehyde was purified by aqueous base wash, drying with sodium sulfate, and followed by fractional distillation. Acetophenone was purified by drying over Na<sub>2</sub>SO<sub>4</sub> then fractional distillation. Methyl Ethyl Ketone was purified by two sequential fractional distillations. Allyl bromide was purified by drying over magnesium sulfate, filtration and fractional distillation. CrCl<sub>3</sub>(THF)<sub>3</sub> was prepared by soxhlet extraction of anhydrous CrCl<sub>3</sub> with anhydrous THF. All other reagents were purchased from commercial sources and used without further purification. Yields were calculated for material judged homogeneous by thin-layer chromatography and NMR. Thin-layer chromatography was performed with EMD silica gel 60 F254 plates eluting with the solvents indicated, visualized by a 254 nm UV lamp, and stained either with potassium permanganate, phosphomolybdic acid, or ninhydrin. Flash column chromatography was performed with EcoChrom MP Silitech 32-63D 60Å silica gel, slurry packed with solvents indicated in glass columns. Nuclear magnetic resonance spectra were acquired at 300, 400, or 500 MHz for <sup>1</sup>H, and 75, 100, or 125 MHz for <sup>13</sup>C and 50°C. Chemical shifts for proton nuclear magnetic resonance (<sup>1</sup>H NMR) spectra are reported in parts per million downfield relative to the line of CHCl<sub>3</sub> singlet at 7.24 ppm. Chemical shifts for carbon nuclear magnetic resonance (<sup>13</sup>C NMR) spectra are reported in parts per million downfield relative to the center-line of the CDCl<sub>3</sub> triplet at 77.23 ppm. The abbreviations s, d, t, p, sep, dd, td, bs, and m stand for the resonance multiplicities singlet, doublet, triplet, pentet, septet, doublet of doublets, triplet of doublets, broad singlet, and multiplet, respectively. Optical rotations were obtained (Na D line) using a Perkin Elmer Model 343 Polarimeter fitted with a micro cell with a 1 dm path length. Concentrations are reported in g/100 mL. SFC (super critical fluid chromatography) analysis was performed at 25 °C or 40 °C, using a Thar instrument fitted with chiral stationary phase (as indicated). Melting points were obtained on an electrothermal melting point apparatus and are uncorrected. Unless otherwise noted, glassware for all reactions was oven-dried at 110 °C and cooled in a dry atmosphere prior to use.

**Ligand Synthesis:** Ligands were prepared according to previously published<sup>1-4</sup> synthetic routes. Herein, we report characterization of all new ligands.

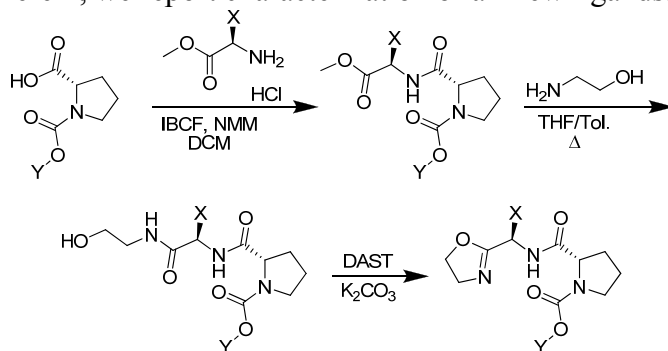

**(S)-methyl 2-((4,5-dihydrooxazol-2-yl)methylcarbamoyl)pyrrolidine-1-carboxylate (L1):<sup>5</sup>**

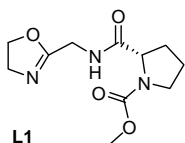

L1

The product of the DAST cyclization, was purified by flash silica-gel column chromatography with 5-10% MeOH/DCM as eluent to give

**S2**

0.301 g of **L1**.  $R_f = 0.3$  w/ 10% MeOH/DCM, yellow oil,  $[\alpha]_D^{20} = -69.5^\circ$  ( $c = 0.965$ ,  $\text{CHCl}_3$ ).  $^1\text{H-NMR}$  (400 MHz,  $\text{CDCl}_3$ )  $\delta = 6.99$  (bs, 1 H), 4.16 (s, 1 H), 4.12 (s, 1H), 3.855 (d,  $J = 4, 2$  H), 3.65 (td,  $J = 9.6, 1.6$ ; 2 H), 3.53 (s, 3 H), 3.34 (bs, 2 H), 2.1-1.65 (m, 4 H).  $^{13}\text{C-NMR}$   $\{^1\text{H}\}$  (100 MHz,  $\text{CDCl}_3$ )  $\delta = 171.9, 164.5, 67.9, 60.5, 54.0, 52.5, 46.9, 36.7, 28.9, 24.0$ . HRMS  $\text{C}_{11}\text{H}_{17}\text{N}_3\text{O}_4$  ( $\text{M}+\text{H}$ ) $^+$  calcd. 256.1297, obsvd. 256.1300.

**(S)-ethyl 2-((4,5-dihydrooxazol-2-yl)methylcarbamoyl)pyrrolidine-1-carboxylate (L2):**<sup>5</sup>

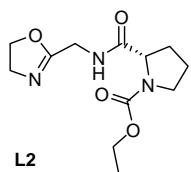

**L2**

The product of the DAST cyclization was purified by flash silica-gel column chromatography with 5-10% MeOH/DCM as eluent to give 0.150 g of **L2**.  $R_f = 0.4$  w/ 10% MeOH/DCM, yellow oil,  $[\alpha]_D^{20} = -69.7^\circ$  ( $c = 1.095$ ,  $\text{CHCl}_3$ ).  $^1\text{H-NMR}$  (400 MHz,  $\text{CDCl}_3$ )  $\delta = 7.02$  (bs, 1H), 4.16 (s, 1H), 4.11 (t,  $J = 9.6, 2$ H), 3.96 (m, 2H), 3.85 (s, 2H), 3.65 (dt,  $J = 9.6, 1.6$ ; 2H), 3.33 (bs, 2H), 2.1-1.65 (m, 4H), 1.071 (t,  $J = 7.2, 3$ H).  $^{13}\text{C-NMR}$   $\{^1\text{H}\}$  (100 MHz,  $\text{CDCl}_3$ )  $\delta = 172.0, 164.5, 67.9, 61.3, 60.4, 54.0, 46.9, 36.7, 28.9, 24.0, 14.3$ . HRMS  $\text{C}_{12}\text{H}_{19}\text{N}_3\text{O}_4$  ( $\text{M}+\text{H}$ ) $^+$  calcd. 270.1454, obsvd. 270.1451.

**(S)-isopropyl 2-((4,5-dihydrooxazol-2-yl)methylcarbamoyl)pyrrolidine-1-carboxylate (L3):**<sup>5</sup>

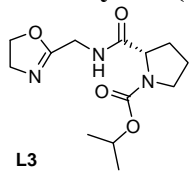

**L3**

The product of the DAST cyclization was purified by flash silica-gel column chromatography with 5-10% MeOH/DCM as eluent to give 0.190 g of **L3**.  $R_f = 0.4$  w/ 10% MeOH/DCM, yellow oil,  $[\alpha]_D^{20} = -0.4^\circ$  ( $c = 0.055$ ,  $\text{CHCl}_3$ ).  $^1\text{H-NMR}$  (400 MHz,  $\text{CDCl}_3$ )  $\delta = 7.08$  (bs, 1H), 4.81 (sep,  $J = 6.4, 1$ H), 4.17 (m, 3H), 3.92 (d,  $J = 4.8, 2$ H), 3.71 (dt,  $J = 9.6, 1.6$ ; 2H), 3.37 (bs, 2H), 2.2-1.7 (m, 4H), 1.13 (m, 6H).  $^{13}\text{C-NMR}$   $\{^1\text{H}\}$  (100 MHz,  $\text{CDCl}_3$ )  $\delta = 172.1, 164.6, 69.0, 68.1, 60.5, 54.1, 47.0, 36.9, 28.5, 24.1, 22.1$ . HRMS  $\text{C}_{13}\text{H}_{21}\text{N}_3\text{O}_4$  ( $\text{M}+\text{H}$ ) $^+$  calcd. 284.1610, obsvd. 284.1606.

**(S)-tert-butyl 2-((4,5-dihydrooxazol-2-yl)methylcarbamoyl)pyrrolidine-1-carboxylate (L4):**<sup>5</sup>

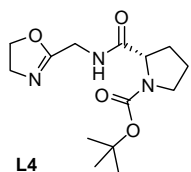

**L4**

The product of the DAST cyclization was purified by flash silica-gel column chromatography with 5-10% MeOH/DCM as eluent to give 0.167 g of **L4**.  $R_f = 0.4$  w/ 10% MeOH/DCM, yellow oil,  $[\alpha]_D^{20} = -11.8^\circ$  ( $c = 0.195$ ,  $\text{CHCl}_3$ ).  $^1\text{H-NMR}$  (400 MHz,  $\text{CDCl}_3$ )  $\delta = 6.63$  (bs, 1H), 4.23 (m, 1H), 4.23 (t,  $J = 9.2, 2$ H), 3.99 (m, 2H), 3.77 (t,  $J = 9.6, 2$ H), 3.40 (bs, 2H), 2.29-1.75 (bs, 4H), 1.41 (s, 9H).  $^{13}\text{C-NMR}$   $\{^1\text{H}\}$  (100 MHz,  $\text{CDCl}_3$ )  $\delta = 172.5, 164.8, 80.6, 68.3, 60.7, 54.3, 47.2, 37.1, 28.5, 24.3$ . HRMS  $\text{C}_{14}\text{H}_{23}\text{N}_3\text{O}_4$  ( $\text{M}+\text{H}$ ) $^+$  calcd. 298.1767, obsvd. 298.1765.

**(S)-heptan-4-yl 2-((4,5-dihydrooxazol-2-yl)methylcarbamoyl)pyrrolidine-1-carboxylate (L5):**<sup>5</sup>

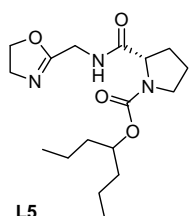

**L5**

The product of the DAST cyclization was purified by flash silica-gel column chromatography with 5-10% MeOH/DCM as eluent to give 0.175 g of **L5**.  $R_f = 0.6$  w/ 10% MeOH/DCM, yellow oil,  $[\alpha]_D^{20} = -9.7^\circ$  ( $c = 0.230$ ,  $\text{CHCl}_3$ ).  $^1\text{H-NMR}$  (400 MHz,  $\text{CDCl}_3$ )  $\delta = 6.91$  (bs, 1H), 4.75 (m, 1H), 4.23 (m, 3H), 3.98 (s, 2H), 3.77 (t,  $J = 9.6, 2$ H), 3.45 (bs, 2H), 2.3-1.78 (m, 4H), 1.47 (m, 4H), 1.29 (m, 4H), 0.85 (m, 6H).  $^{13}\text{C-NMR}$

{<sup>1</sup>H} (100 MHz, CDCl<sub>3</sub>) δ = 167.3, 75.7, 68.3, 60.7, 54.3, 47.2, 37.1, 36.7, 24.4, 18.7, 18.6, 14.1. HRMS C<sub>17</sub>H<sub>29</sub>N<sub>3</sub>O<sub>4</sub> (M+H)<sup>+</sup> calcd. 340.2236, obsvd. 340.2239.

**(S)-methyl 2-((R)-1-(4,5-dihydrooxazol-2-yl)ethylcarbamoyl)pyrrolidine-1-carboxylate (L6):**<sup>5</sup>

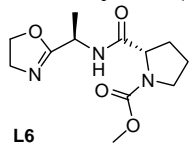

The product of the DAST cyclization was purified by flash silica-gel column chromatography with 5-10% MeOH/DCM as eluent to give 0.365 g of **L6**. R<sub>f</sub> = 0.4 w/ 10% MeOH/DCM, white solid, MP = 102-105 °C. [α]<sub>D</sub><sup>20</sup> = -9.2° (c = 0.140, CHCl<sub>3</sub>). <sup>1</sup>H-NMR (400 MHz, CDCl<sub>3</sub>) δ = 6.91 (bs, 1H), 4.61 (p, *J* = 6.8, 1H), 4.23 (m, 3H), 3.77 (t, *J* = 10, 2H), 3.66 (s, 3H), 3.47 (bs, 2H), 2.2-1.75 (m, 4H), 1.33 (d, *J* = 7.2, 3H). <sup>13</sup>C-NMR {<sup>1</sup>H} (100 MHz, CDCl<sub>3</sub>) δ = 171.6, 168.4, 68.4, 61.1, 54.3, 52.8, 47.4, 43.8, 30.2, 24.2, 19.1. HRMS C<sub>12</sub>H<sub>19</sub>N<sub>3</sub>O<sub>4</sub> (M+H)<sup>+</sup> calcd. 270.1454, obsvd. 270.1453.

**(S)-ethyl 2-((R)-1-(4,5-dihydrooxazol-2-yl)ethylcarbamoyl)pyrrolidine-1-carboxylate (L7):**<sup>5</sup>

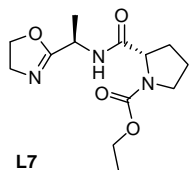

The product of the DAST cyclization was purified by flash silica-gel column chromatography with 5-10% MeOH/DCM as eluent to give 0.278 g of **L7**. R<sub>f</sub> = 0.4 w/ 10% MeOH/DCM, white solid, MP = 93-94 °C. [α]<sub>D</sub><sup>20</sup> = -13.8° (c = 0.225, CHCl<sub>3</sub>). <sup>1</sup>H-NMR (400 MHz, CDCl<sub>3</sub>) δ = 6.86 (bs, 1H), 4.57 (p, *J* = 11.2, 1H), 4.19 (t, *J* = 9.6, 2H), 4.06 (m, 1H), 3.73 (t, *J* = 9.6, 2H), 3.43 (bs, 2H), 2.20-1.70 (m, 4H), 1.29 (d, *J* = 7.2, 3H), 1.17 (m, 3H). <sup>13</sup>C-NMR {<sup>1</sup>H} (100 MHz, CDCl<sub>3</sub>) δ = 171.5, 168.3, 68.3, 61.6, 60.9, 54.2, 47.2, 43.6, 29.7, 24.1, 19.1, 14.7. HRMS C<sub>13</sub>H<sub>21</sub>N<sub>3</sub>O<sub>4</sub> (M+H)<sup>+</sup> calcd. 284.1610, obsvd. 284.1609.

**(S)-isopropyl 2-((R)-1-(4,5-dihydrooxazol-2-yl)ethylcarbamoyl)pyrrolidine-1-carboxylate (L8):**<sup>5</sup>

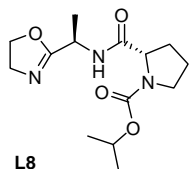

The product of the DAST cyclization was purified by flash silica-gel column chromatography with 5-10% MeOH/DCM as eluent to give 0.285 g of **L8**. R<sub>f</sub> = 0.5 w/ 10% MeOH/DCM, white solid, MP = 79-80 °C. [α]<sub>D</sub><sup>20</sup> = -9.5° (c = 0.165, CHCl<sub>3</sub>). <sup>1</sup>H-NMR (400 MHz, CDCl<sub>3</sub>) δ = 6.65 (bs, 1H), 4.88 (sep, *J* = 6, 1H), 4.62 (p, *J* = 7, 1H), 4.22 (m, 3H), 3.76 (t, *J* = 9.6, 2H), 3.45 (bs, 2H), 2.30-1.75 (m, 4H), 1.33 (d, *J* = 6.8, 3H), 1.19 (t, *J* = 6.8, 6H). <sup>13</sup>C-NMR {<sup>1</sup>H} (100 MHz, CDCl<sub>3</sub>) δ = 171.7, 168.4, 69.2, 68.4, 61.0, 54.3, 47.2, 43.7, 29.8, 24.1, 22.3, 22.3, 19.2. HRMS C<sub>14</sub>H<sub>23</sub>N<sub>3</sub>O<sub>4</sub> (M+H)<sup>+</sup> calcd. 298.1767, obsvd. 298.1765.

**(S)-tert-butyl 2-((R)-1-(4,5-dihydrooxazol-2-yl)ethylcarbamoyl)pyrrolidine-1-carboxylate (L9):**<sup>5</sup>

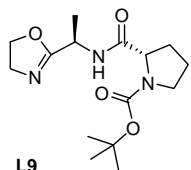

The product of the DAST cyclization was purified by flash silica-gel column chromatography with 5-10% MeOH/DCM as eluent to give 0.325 g of **L9**. R<sub>f</sub> = 0.5 w/ 10% MeOH/DCM, white solid, MP = 91-94 °C. [α]<sub>D</sub><sup>20</sup> = -14.4° (c = 0.195, CHCl<sub>3</sub>). <sup>1</sup>H-NMR (400 MHz, CDCl<sub>3</sub>) δ = 6.65 (bs, 1H), 4.63 (p, *J* = 8, 1H), 4.22 (m, 3H), 3.76 (t, *J* = 8.8, 2H), 3.42 (bs, 2H), 2.3-1.73 (m, 4H), 1.41 (s, 9H), 1.35 (dd, *J* = 4.8, 2; 3H).

$^{13}\text{C-NMR}$   $\{^1\text{H}\}$  (100 MHz,  $\text{CDCl}_3$ )  $\delta$  = 174.1, 168.3, 80.5, 68.4, 54.3, 47.2, 43.7, 28.5, 24.1, 19.3. HRMS  $\text{C}_{15}\text{H}_{25}\text{N}_3\text{O}_4$  ( $\text{M}+\text{H}$ ) $^+$  calcd. 312.1923, obsvd. 312.1922.

**(S)-heptan-4-yl 2-((R)-1-(4,5-dihydrooxazol-2-yl)ethylcarbamoyl)pyrrolidine-1-carboxylate (L10):**<sup>5</sup>

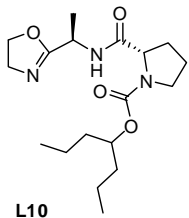

The product of the DAST cyclization was purified by flash silica-gel column chromatography with 5-10% MeOH/DCM as eluent to give 0.125 g of **L10**.  $R_f$  = 0.5 w/ 10% MeOH/DCM, white solid, MP = 91-93 °C.  $[\alpha]_D^{20} = -5^\circ$  ( $c = 0.090$ ,  $\text{CHCl}_3$ ).  $^1\text{H-NMR}$  (400 MHz,  $\text{CDCl}_3$ )  $\delta$  = 6.68 (bs, 1H), 4.80 (m, 1H), 4.65 (p,  $J = 7.2$ , 1H), 4.25 (m, 3H), 3.79 (t,  $J = 10.4$ , 2H), 3.49 (bs, 2H), 2.35-1.78 (m, 4H), 1.60-1.25 (m, 8H), 0.89 (t,  $J = 7.2$ , 6H).  $^{13}\text{C-NMR}$   $\{^1\text{H}\}$  (100 MHz,  $\text{CDCl}_3$ )  $\delta$  = 168.5, 164.3, 75.8, 68.5, 61.1, 54.4, 47.3, 43.8, 36.8, 19.2, 18.8, 14.2, 14.2. HRMS  $\text{C}_{17}\text{H}_{29}\text{N}_3\text{O}_4$  ( $\text{M}+\text{H}$ ) $^+$  calcd. 354.2393, obsvd. 354.2390.

**(S)-methyl 2-((R)-1-(4,5-dihydrooxazol-2-yl)propylcarbamoyl)pyrrolidine-1-carboxylate (L11):**<sup>5</sup>

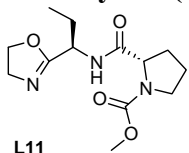

The product of the DAST cyclization was purified by flash silica-gel column chromatography with 5-10% MeOH/DCM as eluent to give 0.213 g of **L11**.  $R_f$  = 0.5 w/ 10% MeOH/DCM, white solid, MP = 109-110 °C.  $[\alpha]_D^{20} = -8.2^\circ$  ( $c = 0.125$ ,  $\text{CHCl}_3$ ).  $^1\text{H-NMR}$  (400 MHz,  $\text{CDCl}_3$ )  $\delta$  = 6.65 (bs, 1H), 4.60 (q,  $J = 6.8$ , 1H), 4.25 (m, 3H), 3.79 (t,  $J = 9.6$ , 2H), 3.69 (s, 3H), 3.50 (bs, 2H), 2.20-1.80 (m, 4H), 1.66 (sep,  $J = 7.2$ , 1H), 0.86 (t,  $J = 7.6$ , 3H).  $^{13}\text{C-NMR}$   $\{^1\text{H}\}$  (100 MHz,  $\text{CDCl}_3$ )  $\delta$  = 167.5, 68.3, 61.2, 54.4, 52.9, 48.8, 47.5, 29.8, 26.1, 24.9, 24.2, 9.3. HRMS  $\text{C}_{13}\text{H}_{21}\text{N}_3\text{O}_4$  ( $\text{M}+\text{H}$ ) $^+$  calcd. 284.1610, obsvd. 284.1609.

**(S)-ethyl 2-((R)-1-(4,5-dihydrooxazol-2-yl)propylcarbamoyl)pyrrolidine-1-carboxylate (L12):**<sup>5</sup>

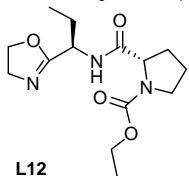

The product of the DAST cyclization was purified by flash silica-gel column chromatography with 5-10% MeOH/DCM as eluent to give 0.315 g of **L12**.  $R_f$  = 0.5 w/ 10% MeOH/DCM, white solid, MP = 99-101 °C.  $[\alpha]_D^{20} = -2.9^\circ$  ( $c = 0.050$ ,  $\text{CHCl}_3$ ).  $^1\text{H-NMR}$  (400 MHz,  $\text{CDCl}_3$ )  $\delta$  = 6.65 (bs, 1H), 4.61 (q,  $J = 6.8$ , 1H), 4.24 (m, 3H), 4.13 (q,  $J = 6.8$ , 1H), 3.79 (t,  $J = 9.6$ , 2H), 3.50 (bs, 2H), 2.25-1.79 (m, 4H), 1.66 (sep,  $J = 7.2$ , 1H), 1.23 (t,  $J = 7.2$ , 3H), 0.869 (t,  $J = 7.6$ , 3H).  $^{13}\text{C-NMR}$   $\{^1\text{H}\}$  (100 MHz,  $\text{CDCl}_3$ )  $\delta$  = 165.4, 68.3, 61.8, 61.1, 54.4, 48.8, 47.4, 26.2, 24.3, 14.8, 9.4. HRMS  $\text{C}_{14}\text{H}_{23}\text{N}_3\text{O}_4$  ( $\text{M}+\text{H}$ ) $^+$  calcd. 298.1767, obsvd. 298.1769.

**(S)-isopropyl 2-((R)-1-(4,5-dihydrooxazol-2-yl)propylcarbamoyl)pyrrolidine-1-carboxylate (L13):**<sup>5</sup>

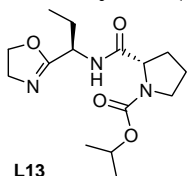

The product of the DAST cyclization was purified by flash silica-gel column chromatography with 5-10% MeOH/DCM as eluent to give 0.190 g of **L13**.  $R_f$  = 0.5 w/ 10% MeOH/DCM, white solid, MP = 92-93 °C.  $[\alpha]_D^{20} = -5.1^\circ$  ( $c = 0.09$ ,  $\text{CHCl}_3$ ).  $^1\text{H-NMR}$  (400 MHz,  $\text{CDCl}_3$ )  $\delta$  = 6.67 (bs, 1H), 4.92 (sep,  $J = 10.4$ , 1H), 4.69 (q,  $J = 6.8$ , 1H), 4.31-4.21 (m, 3H), 3.80 (t,  $J = 9.6$ , 2H), 3.49 (bs, 2H), 2.30-1.80 (m, 4H), 1.652

(sep,  $J = 8$ , 1H), 1.22 (t,  $J = 5.6$ , 3H), 0.89 (t,  $J = 7.2$ , 3H).  $^{13}\text{C-NMR}$   $\{^1\text{H}\}$  (100 MHz,  $\text{CDCl}_3$ )  $\delta = 170.9, 167.5, 69.3, 68.3, 61.1, 54.4, 48.9, 47.4, 26.3, 24.2, 22.4, 22.3, 9.5$ . HRMS  $\text{C}_{15}\text{H}_{25}\text{N}_3\text{O}_4$  (M+H) $^+$  calcd. 312.1923, obsvd. 312.1921.

**(S)-tert-butyl 2-((R)-1-(4,5-dihydrooxazol-2-yl)propylcarbamoyl)pyrrolidine-1-carboxylate (L14):**<sup>5</sup>

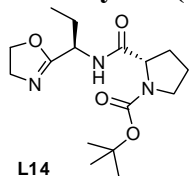

L14

The product of the DAST cyclization was purified by flash silica-gel column chromatography with 5-10% MeOH/DCM as eluent to give 0.330 g of **L14**.  $R_f = 0.5$  w/ 10% MeOH/DCM, white solid, MP = 131-132 °C.  $[\alpha]_D^{20} = -4.5^\circ$  ( $c = 0.080$ ,  $\text{CHCl}_3$ ).  $^1\text{H-NMR}$  (400 MHz,  $\text{CDCl}_3$ )  $\delta = 6.98$  (bs, 1H), 4.61 (q,  $J = 7.2$ , 1H), 4.24 (m, 3H), 3.79 (t,  $J = 9.6$ , 2H), 3.45 (bs, 2H), 2.30-1.80 (m, 4H), 1.68 (sep,  $J = 7.2$ , 1H), 1.44 (s, 9H), 0.89 (t,  $J = 7.2$ , 3H).  $^{13}\text{C-NMR}$   $\{^1\text{H}\}$  (100 MHz,  $\text{CDCl}_3$ )  $\delta = 172.7, 167.5, 94.7, 68.2, 61.1, 54.4, 48.8, 47.3, 28.6, 26.3, 24.1, 9.5$ . HRMS  $\text{C}_{16}\text{H}_{27}\text{N}_3\text{O}_4$  (M+H) $^+$  calcd. 326.2080, obsvd. 326.2079.

**(S)-heptan-4-yl 2-((R)-1-(4,5-dihydrooxazol-2-yl)propylcarbamoyl)pyrrolidine-1-carboxylate (L15):**<sup>5</sup>

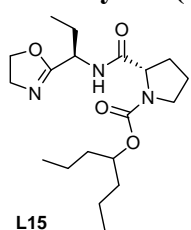

L15

The product of the DAST cyclization was purified by flash silica-gel column chromatography with 1-10% MeOH/DCM as eluent to give 0.198 g of **L15**.  $R_f = 0.6$  w/ 50% Acetone/Hexanes, white solid, MP = 74-75 °C.  $[\alpha]_D^{20} = -6.1^\circ$  ( $c = 0.130$ ,  $\text{CHCl}_3$ ).  $^1\text{H-NMR}$  (400 MHz,  $\text{CDCl}_3$ )  $\delta = 6.67$  (bs, 1H), 4.79 (m, 1H), 4.59 (q,  $J = 7.2$ , 1H), 4.31-4.20 (m, 3H), 3.78 (t,  $J = 9.6$ , 2H), 3.49 (bs, 2H), 2.32-1.78 (m, 4H), 1.65 (sep,  $J = 7.2$ , 1H), 1.49 (m, 4H), 1.30 (m, 4H), 0.87 (m, 6H).  $^{13}\text{C-NMR}$   $\{^1\text{H}\}$  (100 MHz,  $\text{CDCl}_3$ )  $\delta = 174.6, 167.5, 75.7, 68.3, 61.0, 54.6, 48.9, 47.4, 36.8, 36.8, 26.3, 24.1, 18.8, 18.7, 14.2, 14.1, 9.5$ . HRMS  $\text{C}_{19}\text{H}_{33}\text{N}_3\text{O}_4$  (M+H) $^+$  calcd. 368.2549, obsvd. 368.2552.

**(S)-methyl 2-((R)-1-(4,5-dihydrooxazol-2-yl)-2-methylpropylcarbamoyl)pyrrolidine-1-carboxylate (L16):**<sup>2</sup>

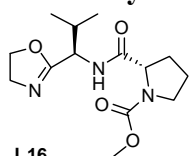

L16

**L16** was synthesized according to previously published methods and the physical data matched to previously published spectra.

**(S)-ethyl 2-((R)-1-(4,5-dihydrooxazol-2-yl)-2-methylpropylcarbamoyl)pyrrolidine-1-carboxylate (L17):**<sup>2</sup>

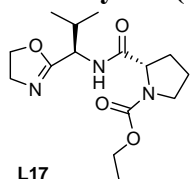

L17

**L17** was synthesized according to previously published methods and the physical data matched to previously published spectra.

**(S)-isopropyl 2-((R)-1-(4,5-dihydrooxazol-2-yl)-2-methylpropylcarbamoyl)pyrrolidine-1-carboxylate (L18):**<sup>2</sup>

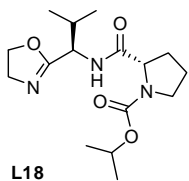

L18

L18 was synthesized according to previously published methods and the physical data matched to previously published spectra.

**(S)-tert-butyl 2-((R)-1-(4,5-dihydrooxazol-2-yl)-2-methylpropylcarbamoyl)pyrrolidine-1-carboxylate (L19):**<sup>4</sup>

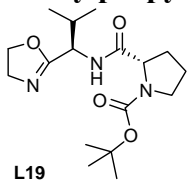

L19

L19 was synthesized according to previously published methods and the physical data matched to previously published spectra.

**(S)-heptan-4-yl 2-((R)-1-(4,5-dihydrooxazol-2-yl)-2-methylpropylcarbamoyl)pyrrolidine-1-carboxylate (L20):**<sup>5</sup>

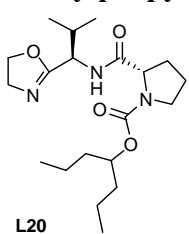

L20

L20 The product of the DAST cyclization was purified flash silica-gel column chromatography with 1-10% MeOH/DCM as eluent to give 0.300 g of L20.  $R_f = 0.7$  w/ 10% MeOH/DCM, white solid, MP = 75-77 °C.  $[\alpha]_D^{20} = -3.6^\circ$  (c = 0.080, CHCl<sub>3</sub>). <sup>1</sup>H-NMR (300 MHz, CDCl<sub>3</sub>)  $\delta = 6.86$  (bs, 1H), 4.80 (td,  $J = 7.2, 5.5$ ; 1H), 4.57 (q,  $J = 5.1$ , 1H), 4.34 (d,  $J = 5.6$ , 1H), 4.22 (td,  $J = 9, 3$ ; 2H), 3.79 (t,  $J = 9.6$ , 2H), 3.50 (m, 2H), 2.40-1.80 (m, 4H), 1.50 (m, 4H), 1.33 (m, 4H), 0.90 (m, 6H). <sup>13</sup>C-NMR {<sup>1</sup>H} (75 MHz, CDCl<sub>3</sub>)  $\delta = 172.8, 167.1, 75.8, 68.1, 61.1, 54.3, 52.7, 47.3, 36.9, 36.8, 31.8, 18.9, 18.8, 18.7, 17.9, 14.2, 14.2$ . HRMS C<sub>20</sub>H<sub>35</sub>N<sub>3</sub>O<sub>4</sub> (M+H)<sup>+</sup> calcd. 382.2706, obsvd. 382.2708.

**(S)-methyl 2-((S)-1-(4,5-dihydrooxazol-2-yl)-2,2-dimethylpropylcarbamoyl)pyrrolidine-1-carboxylate (L21):**<sup>5,8</sup>

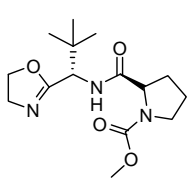

L21

The product of the DAST cyclization was purified by flash silica-gel column chromatography with 50% Acetone/Hexane as eluent to give 0.140 g of L21.  $R_f = 0.4$  w/ 50% Acetone/Hexanes, white solid, MP = 133-135 °C.  $[\alpha]_D^{20} = +3.4^\circ$  (c = 0.055, CHCl<sub>3</sub>). <sup>1</sup>H-NMR (400 MHz, CDCl<sub>3</sub>)  $\delta = 6.71$  (bs, 1H), 4.52 (d,  $J = 8$ , 1H), 4.21 (m, 3H), 3.79 (m, 2H), 3.69 (s, 3H), 3.51 (bs, 2H), 2.20-1.80 (m, 4H), 0.94 (s, 9H). <sup>13</sup>C-NMR {<sup>1</sup>H} (100 MHz, CDCl<sub>3</sub>)  $\delta = 171.5, 166.8, 67.7, 61.3, 55.5, 54.3, 52.9, 47.5, 35.5, 26.7, 24.2$ . HRMS C<sub>15</sub>H<sub>25</sub>N<sub>3</sub>O<sub>4</sub> (M+H)<sup>+</sup> calcd. 312.1923, obsvd. 312.1924.

**(S)-ethyl 2-((S)-1-(4,5-dihydrooxazol-2-yl)-2,2-dimethylpropylcarbamoyl)pyrrolidine-1-carboxylate (L22):**<sup>5,8</sup>

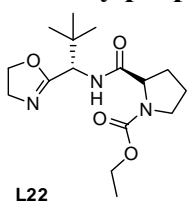

L22

The product of the DAST cyclization was purified by flash silica-gel column chromatography with 50% Acetone/Hexane as eluent to give 0.320 g of L22.  $R_f = 0.45$  w/ 10% Acetone/Hexanes, white solid, MP = 134-136 °C.  $[\alpha]_D^{20} = +5.8^\circ$  (c = 0.105, CHCl<sub>3</sub>). <sup>1</sup>H-NMR (400 MHz, CDCl<sub>3</sub>)  $\delta = 6.73$  (bs, 1H), 4.53 (d,  $J = 9.6$ , 1H), 4.33 (d,  $J = 7.2$ , 1H),

4.17 (m, 4H), 3.80 (m, 2H), 3.51 (bs, 2H), 2.25-1.80 (m, 4H), 1.24 (t,  $J = 7.2$ , 3H), 0.96 (s, 9H).  $^{13}\text{C-NMR}$   $\{^1\text{H}\}$  (100 MHz,  $\text{CDCl}_3$ )  $\delta = 180.0, 166.8, 67.7, 61.9, 61.2, 55.2, 54.4, 47.43, 41.4, 26.7, 24.2, 14.9$ . HRMS  $\text{C}_{16}\text{H}_{27}\text{N}_3\text{O}_4$  ( $\text{M}+\text{H}$ ) $^+$  calcd. 326.2080, obsvd. 326.2078.

**(S)-isopropyl 2-((S)-1-(4,5-dihydrooxazol-2-yl)-2,2-dimethylpropylcarbamoyl)pyrrolidine-1-carboxylate (L23):**<sup>5,8</sup>

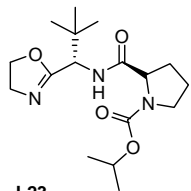

L23

The product of the DAST cyclization was purified by flash silica-gel column chromatography with 50% Acetone/Hexane as eluent to give 0.290 g of **L23**.  $R_f = 0.55$  w/ 50% Acetone/Hexanes, white solid, MP = 148-150 °C.  $[\alpha]_D^{20} = +5.4^\circ$  ( $c = 0.090$ ,  $\text{CHCl}_3$ ).  $^1\text{H-NMR}$  (400 MHz,  $\text{CDCl}_3$ )  $\delta = 6.98$  (bs, 1H), 4.92 (sep,  $J = 6.4$ , 1H), 4.53 (d,  $J = 9.6$ , 1H), 4.58 (d,  $J = 6.8$ , 1H), 4.23 (m, 2H), 3.79 (m, 2H), 3.49 (bs, 2H), 2.28-1.80 (m, 4H), 1.23 (d,  $J = 6$ , 6H), 0.96 (s, 9H).  $^{13}\text{C-NMR}$   $\{^1\text{H}\}$  (100 MHz,  $\text{CDCl}_3$ )  $\delta = 171.3, 166.8, 94.7, 69.4, 67.6, 61.1, 55.5, 54.5, 47.4, 35.5, 26.8, 22.4, 22.4$ . HRMS  $\text{C}_{17}\text{H}_{29}\text{N}_3\text{O}_4$  ( $\text{M}+\text{H}$ ) $^+$  calcd. 340.2236, obsvd. 340.2242.

**(S)-tert-butyl 2-((S)-1-(4,5-dihydrooxazol-2-yl)-2,2-dimethylpropylcarbamoyl)pyrrolidine-1-carboxylate (L24):**<sup>5,8</sup>

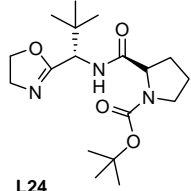

L24

The product of the DAST cyclization was purified by flash silica-gel column chromatography with 50% Acetone/Hexane as eluent to give 0.300 g of **L24**.  $R_f = 0.5$  w/ 10% Acetone/Hexanes, white solid, MP = 141-143 °C.  $[\alpha]_D^{20} = +6.1^\circ$  ( $c = 0.095$ ,  $\text{CHCl}_3$ ).  $^1\text{H-NMR}$  (400 MHz,  $\text{CDCl}_3$ )  $\delta = 6.97$  (bs, 1H), 4.52 (d,  $J = 9.6$ , 1H), 4.21 (m, 3H), 3.82 (m, 2H), 3.44 (bs, 2H), 2.25-1.80 (m, 4H), 1.44 (s, 9H), 0.96 (s, 9H).  $^{13}\text{C-NMR}$   $\{^1\text{H}\}$  (100 MHz,  $\text{CDCl}_3$ )  $\delta = 166.8, 67.6, 61.4, 55.5, 54.3, 47.3, 41.9, 35.4, 28.6, 26.7, 24.1$ . HRMS  $\text{C}_{18}\text{H}_{31}\text{N}_3\text{O}_4$  ( $\text{M}+\text{H}$ ) $^+$  calcd. 354.2392, obsvd. 354.2390.

**(S)-heptan-4-yl 2-((S)-1-(4,5-dihydrooxazol-2-yl)-2,2-dimethylpropylcarbamoyl)pyrrolidine-1-carboxylate (L25):**<sup>5,8</sup>

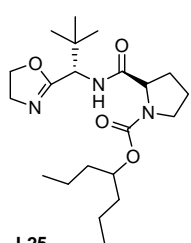

L25

The product of the DAST cyclization was purified by flash silica-gel column chromatography with 50% Acetone/Hexane as eluent to give 0.210 g of **L25**.  $R_f = 0.6$  w/ 10% MeOH/DCM, white solid, MP = 103-105 °C.  $[\alpha]_D^{20} = +2.7^\circ$  ( $c = 0.070$ ,  $\text{CHCl}_3$ ).  $^1\text{H-NMR}$  (400 MHz,  $\text{CDCl}_3$ )  $\delta = 6.99$  (bs, 1H), 4.75 (m, 1H), 4.47 (t,  $J = 9.6$ , 1H), 4.29 (m, 1H), 4.15 (m, 2H), 3.75 (m, 2H), 3.44 (bs, 2H), 2.3-1.75 (m, 4H), 1.46 (m, 4H), 1.28 (m, 4H), 0.89 (m, 9H), 0.83 (m, 6H).  $^{13}\text{C-NMR}$   $\{^1\text{H}\}$  (100 MHz,  $\text{CDCl}_3$ )  $\delta = 172.1, 166.7, 75.7, 67.5, 66.9, 55.5, 54.2, 47.2, 36.8, 36.7, 35.3, 26.7, 24.1, 18.7, 18.7, 14.1$ . HRMS  $\text{C}_{21}\text{H}_{37}\text{N}_3\text{O}_4$  ( $\text{M}+\text{H}$ ) $^+$  calcd. 396.2862, obsvd. 396.2859.

**(S)-1-(3,3-diethylpentanoyl)-N-((4,5-dihydrooxazol-2-yl)methyl)pyrrolidine-2-carboxamide (L26):**<sup>5</sup>

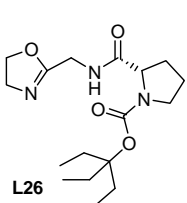

L26

The product of the DAST cyclization was purified by flash silica-gel column chromatography with 1-5% MeOH/DCM as eluent to give 0.182 g of **L26**.  $R_f = 0.6$  w/ 10% MeOH/DCM, yellow oil.  $[\alpha]_D^{20} = -34.7^\circ$  ( $c = 0.11$ ,  $\text{CHCl}_3$ ).  $^1\text{H-NMR}$  (400 MHz,  $\text{CDCl}_3$ )  $\delta = 6.67$  (bs, 1H), 4.627 (m,



1H), 4.23 (m, 3H), 3.77 (t,  $J = 9.2$ , 2H), 3.43 (bs, 2H), 2.23-1.8 (m, 4H), 1.79 (q,  $J = 7$ , 4H), 1.34 (d,  $J = 7.2$ , 3H), 0.783 (t,  $J = 7.2$ , 9H).  $^{13}\text{C-NMR}$   $\{^1\text{H}\}$  (100 MHz,  $\text{CDCl}_3$ )  $\delta = 168.4, 68.4, 60.5, 54.4, 47.3, 47.2, 43.7, 28.3, 27.4, 24.2, 19.2, 7.8$ . HRMS  $\text{C}_{21}\text{H}_{37}\text{N}_3\text{O}_4$  ( $\text{M}+\text{H}$ ) $^+$  calcd. 340.2236, obsvd. 340.2237.

**(S)-3-ethylpentan-3-yl 2-((R)-1-(4,5-dihydrooxazol-2-yl)ethylcarbamoyl)pyrrolidine-1-carboxylate (L27):**<sup>5</sup>

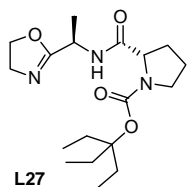

The product of the DAST cyclization was purified by flash silica-gel column chromatography with 1-5% MeOH/DCM as eluent to give 0.304 g of **L27**.  $R_f = 0.7$  w/ 10% MeOH/DCM, white solid, MP = 88-90 °C.  $[\alpha]_D^{20} = -44.0^\circ$  ( $c = 0.310$ ,  $\text{CHCl}_3$ ).  $^1\text{H-NMR}$  (400 MHz,  $\text{CDCl}_3$ )  $\delta = 6.68$  (bs, 1H), 4.63 (m, 1H), 4.23 (m, 3H), 3.77 (t,  $J = 9.2$ , 2H), 3.43 (bs, 2H), 2.23-1.80 (m, 4H), 1.79 (q,  $J = 7$ , 6H), 1.34 (d,  $J = 7.2$ , 3H), 0.78 (t,  $J = 7$ , 9H).  $^{13}\text{C-NMR}$   $\{^1\text{H}\}$  (100 MHz,  $\text{CDCl}_3$ )  $\delta = 168.4, 68.4, 60.5, 54.4, 47.3, 43.7, 28.3, 27.4, 24.2, 19.2, 7.8$ . HRMS  $\text{C}_{21}\text{H}_{37}\text{N}_3\text{O}_4$  ( $\text{M}+\text{H}$ ) $^+$  calcd. 354.2393, obsvd. 354.2396.

**(S)-3-ethylpentan-3-yl 2-((R)-1-(4,5-dihydrooxazol-2-yl)propylcarbamoyl)pyrrolidine-1-carboxylate (L28):**<sup>5</sup>

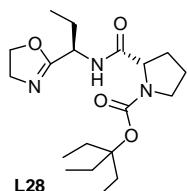

The product of the DAST cyclization was purified by flash silica-gel column chromatography with 1-5% MeOH/DCM as eluent to give 0.252 g of **L28**.  $R_f = 0.7$  w/ 10% MeOH/DCM, white solid, MP = 99-103 °C.  $[\alpha]_D^{20} = -35.9^\circ$  ( $c = .350$ ,  $\text{CHCl}_3$ ).  $^1\text{H-NMR}$  (400 MHz,  $\text{CDCl}_3$ )  $\delta = 6.74$  (bs, 1H), 4.58 (m, 1H), 4.22 (m, 3H), 3.77 (t,  $J = 9.6$ , 2H), 3.44 (bs, 2H), 2.32-1.80 (m, 4H), 1.80 (q,  $J = 7.2$ , 6H), 0.87 (m, 3H), 0.79 (t,  $J = 7.2$ , 9H).  $^{13}\text{C-NMR}$   $\{^1\text{H}\}$  (100 MHz,  $\text{CDCl}_3$ )  $\delta = 167.5, 68.2, 54.4, 48.8, 43.7, 47.2, 27.4, 26.3, 24.4, 9.6, 7.9$ . HRMS  $\text{C}_{21}\text{H}_{37}\text{N}_3\text{O}_4$  ( $\text{M}+\text{H}$ ) $^+$  calcd. 368.2548, obsvd. 368.2549.

**(S)-3-ethylpentan-3-yl 2-((R)-1-(4,5-dihydrooxazol-2-yl)-2-methylpropylcarbamoyl)pyrrolidine-1-carboxylate (L29):**<sup>5</sup>

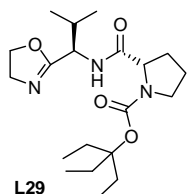

The product of the DAST cyclization was purified by flash silica-gel column chromatography with 1-5% MeOH/DCM as eluent to give 0.252 g of **L29**.  $R_f = 0.7$  w/ 10% MeOH/DCM, white solid, MP = 87-88 °C.  $[\alpha]_D^{20} = 37.0^\circ$  ( $c = 0.275$ ,  $\text{CHCl}_3$ ).  $^1\text{H-NMR}$  (400 MHz,  $\text{CDCl}_3$ )  $\delta = 6.76$  (bs, 1H), 4.56 (m, 1H), 4.30 (d,  $J = 7.6$ , 1H), 4.22 (m, 2H), 3.77 (t,  $J = 9.2$ , 2H), 3.44 (bs, 2H), 2.30-1.90 (m, 5H), 1.82 (q,  $J = 7.2$ , 6H), 0.91 (m, 6H), 0.81 (t,  $J = 7.2$ , 9H).  $^{13}\text{C-NMR}$   $\{^1\text{H}\}$  (100 MHz,  $\text{CDCl}_3$ )  $\delta = 170.9, 167.0, 68.0, 54.3, 52.8, 47.4, 47.3, 31.8, 27.5, 19.0, 18.1, 8.0$ . HRMS  $\text{C}_{21}\text{H}_{37}\text{N}_3\text{O}_4$  ( $\text{M}+\text{H}$ ) $^+$  calcd. 382.2706, obsvd. 382.2710.

### Allylation of Benzaldehyde:

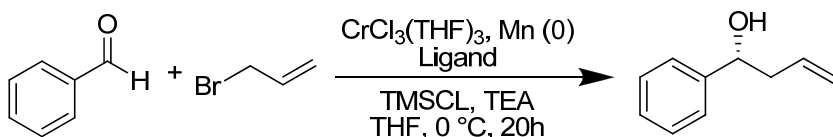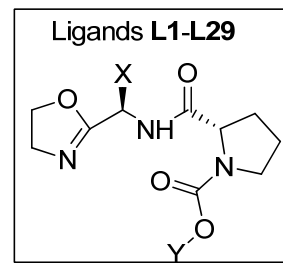

To an oven dried 1.5 dram vial with stir bar, was added  $\text{CrCl}_3(\text{THF})_3$  (9.4 mg, 0.025mmol, 0.1 eq.), manganese powder (27.5 mg, 0.5 mmol, 2 eq.), and ligand (0.0275 mmol, 0.11 eq.). The vial was then fitted with a Teflon septum and cap. The vial was further sealed by wrapping the cap with Teflon tape. The vial was then purged under vacuum and flushed with argon gas 3 times. Under an atmosphere of argon, a standard solution of THF/TEA (0.6% TEA/THF, or 7.5  $\mu\text{L}$  per 1.25 ml, in the test reaction 1.25 ml of this solution was added to each vial) was added. The reaction was then stirred for 3-5 minutes and TMSCl (124  $\mu\text{L}$ , 1 mmol, 4 eq.) was added dropwise. The reaction was then allowed to stir for 20 minutes at RT. After 20 minutes, the reaction had turned dark grey. The vial was transported to a cold bath at 0 °C and allowed to equilibrate for 10 minutes. After equilibration, allyl bromide (45  $\mu\text{L}$ , 0.5 mmol, 2 eq.) was added. The reaction was then allowed to stir for another 20 minutes and finally benzaldehyde was added. The reaction was then stirred vigorously for 20h and slowly turned light gray or greenish gray. The reaction was quenched by slow addition of a saturated sodium bicarbonate solution (approx. 1 mL). The mixture was separated and the aqueous layer washed with diethyl ether (1x1ml). The organic layers were combined and passed over a Celite plug and collected. The organic layer was then dried with sodium sulfate and passed over a silica plug. The silica was rinsed with diethyl ether (~1mL). Samples of the corresponding enantiomeric products were then prepped for analysis without consideration for yield.

### **(R)-1-phenylbut-3-en-1-ol:**

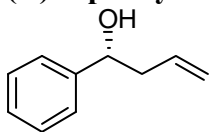

All physical data obtained from the above reaction was consistent with (R)-1-phenylbut-3-en-1-ol please see previous publications<sup>6</sup> for characterization.

### Allylation of Acetophenone:

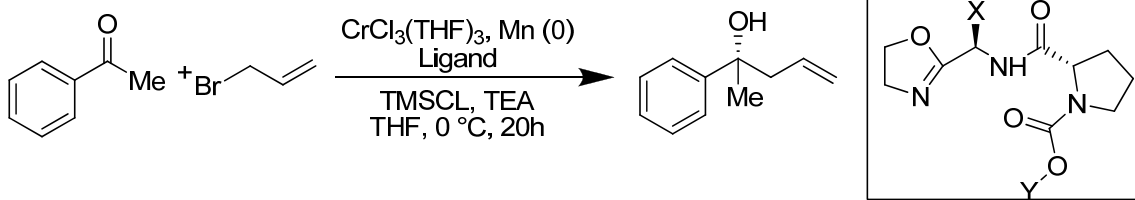

To an oven dried 1.5 dram vial with stir bar, was added  $\text{CrCl}_3(\text{THF})_3$  (9.4 mg, 0.025mmol, 0.1 eq.), 325 mesh manganese powder (27.5 mg, 0.5 mmol, 2 eq.), and ligand (.0275 mmol, 0.11 eq.). The vial was then fitted with a Teflon septum and cap. The vial was further sealed by wrapping the cap with Teflon tape. The vial was then purged under vacuum and flushed with argon gas 3 times. Under an atmosphere of argon, a standard solution of THF/TEA (0.6% TEA/THF, or 7.5  $\mu\text{L}$  per 1.25 ml, in the test reaction 1.25 ml of this solution was added to each vial) was added. The reaction was then stirred for 3-5 minutes and  $\text{TMSCl}$  (124  $\mu\text{L}$ , 1 mmol, 4 eq.) was added dropwise. The reaction was then allowed to stir for 20 minutes at RT. After 20 minutes, the reaction had turned dark grey. The vial was transported to a cold bath at  $0\text{ }^\circ\text{C}$  and allowed to equilibrate for 10 minutes. After equilibration, allyl bromide (45  $\mu\text{L}$ , 0.5 mmol, 2 eq.) was added. The reaction was then allowed to stir for another 20 minutes and finally acetophenone was added. The reaction was then stirred vigorously for 20h and slowly turned light gray or greenish gray. The reaction was quenched by slow addition of a saturated sodium bicarbonate solution (approx. 1 mL). The mixture was separated and the aqueous layer washed with diethyl ether (1x1ml). The organic layers were combined and passed over a Celite plug and collected. The organic layer was then dried with sodium sulfate and passed over a silica plug. The silica was rinsed with diethyl ether (~1mL). Samples of the corresponding enantiomeric products were then prepped for analysis without consideration for yield.

### **(S) 2-phenylpent-4-en-2-ol:**

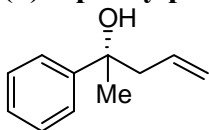

All physical data obtained from the above reaction was consistent with (S)-2-phenylpent-4-en-2-ol please see previous publications<sup>6</sup> for characterization.

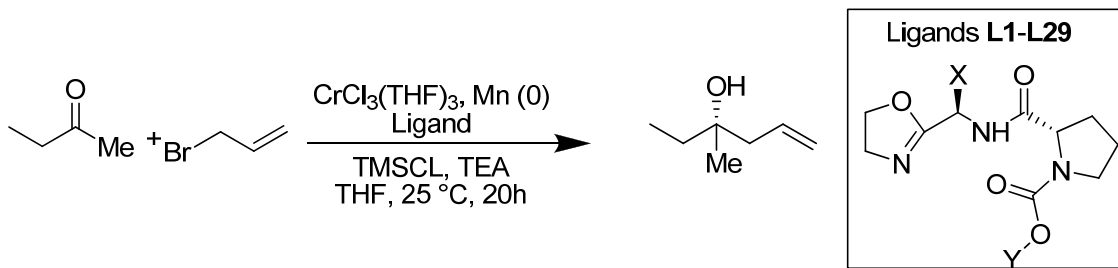

To an oven dried 1.5 dram vial with stir bar, was added  $\text{CrCl}_3(\text{THF})_3$  (9.4 mg, 0.025mmol, 0.1 eq.), 325 mesh manganese powder (27.5 mg, 0.5 mmol, 2 eq.), and ligand (.0275 mmol, 0.11 eq.). The vial was then fitted with a Teflon septum and cap. The vial was further sealed by wrapping the cap with Teflon tape. The vial was then purged under vacuum and flushed with argon gas 3 times. Under an atmosphere of argon, a standard solution of THF/TEA (0.6% TEA/THF, or 7.5  $\mu\text{L}$  per 1.25 ml, in the test reaction 1.25 ml of this solution was to each vial) was added. The reaction was then stirred for 3-5 minutes and  $\text{TMSCl}$  (124  $\mu\text{L}$ , 1 mmol, 4 eq.) was added dropwise. The reaction was then allowed to stir for 20 minutes at RT. After 20 minutes, the reaction had turned dark grey. Allyl bromide (45  $\mu\text{L}$ , 0.5 mmol, 2 eq.) was added. The reaction was then allowed to stir for another 20 minutes and finally methyl ethyl ketone was added. The reaction was then stirred vigorously for 20h and slowly turned light gray or greenish gray. The reaction was quenched by slow addition of a saturated sodium bicarbonate solution (approx. 1 mL). The mixture was separated and the aqueous layer washed with diethyl ether (1x1ml). The organic layers were combined and passed over a Celite plug and collected. The organic layer was then dried with sodium sulfate and passed over a silica plug. The silica was rinsed with diethyl ether (~1mL). Samples of the corresponding enantiomeric products were then prepped for analysis without consideration for yield.

**3-methylhex-5-en-3-ol:** All spectrographic data was consistent with previously published results.

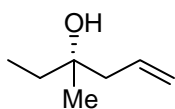

### **SFC Analysis:**

Enantiomeric analysis for (R)-1-phenylbut-3-en-1-ol were carried using a Thar SFC system. Concentrations of approximately 5-10 mg/mL sample were loaded. Injections were made at 5  $\mu$ L sample loading on a Chiralcel OJ-H (0.46cm x 25 cm) column. The chiral separation was carried out using 1% MeOH at 40  $^{\circ}$ C. Peak 1  $R_T$ : 7.43 min, Peak 2  $R_T$ : 8.11.

**Table 1.** Tabulated SFC enantiomeric ratio determination results for benzaldehyde.

| <u>Ligand</u> | <u>Peak 1</u> | <u>Peak 2</u> | <u>Ligand</u> | <u>Peak 1</u> | <u>Peak 2</u> |
|---------------|---------------|---------------|---------------|---------------|---------------|
| <b>L1</b>     | 49            | 51            | <b>L16</b>    | 37.5          | 62.5          |
| <b>L2</b>     | 36.5          | 63.5          | <b>L17</b>    | 16.5          | 83.5          |
| <b>L3</b>     | 38.5          | 61.5          | <b>L18</b>    | 14.5          | 85.5          |
| <b>L4</b>     | 15            | 85            | <b>L19</b>    | 8.5           | 91.5          |
| <b>L5</b>     | 22.25         | 73.25         | <b>L20</b>    | 24.3          | 75.7          |
| <b>L6</b>     | 44            | 56            | <b>L21</b>    | 39.6          | 60.4          |
| <b>L7</b>     | 39            | 61            | <b>L22</b>    | 41            | 59            |
| <b>L8</b>     | 35.5          | 64.5          | <b>L23</b>    | 35.25         | 64.75         |
| <b>L9</b>     | 17            | 83            | <b>L24</b>    | 35            | 65            |
| <b>L10</b>    | 12            | 88            | <b>L25</b>    | 31.5          | 68.5          |
| <b>L11</b>    | 39            | 61            | <b>L26</b>    | 42.5          | 57.5          |
| <b>L12</b>    | 25.5          | 74.5          | <b>L27</b>    | 34            | 66            |
| <b>L13</b>    | 16.5          | 83.5          | <b>L28</b>    | 44?           | 56?           |
| <b>L14</b>    | 9.5           | 90.5          | <b>L29</b>    | 40            | 60            |
| <b>L15</b>    | 11            | 89            |               |               |               |

### *Example Chromatograms*

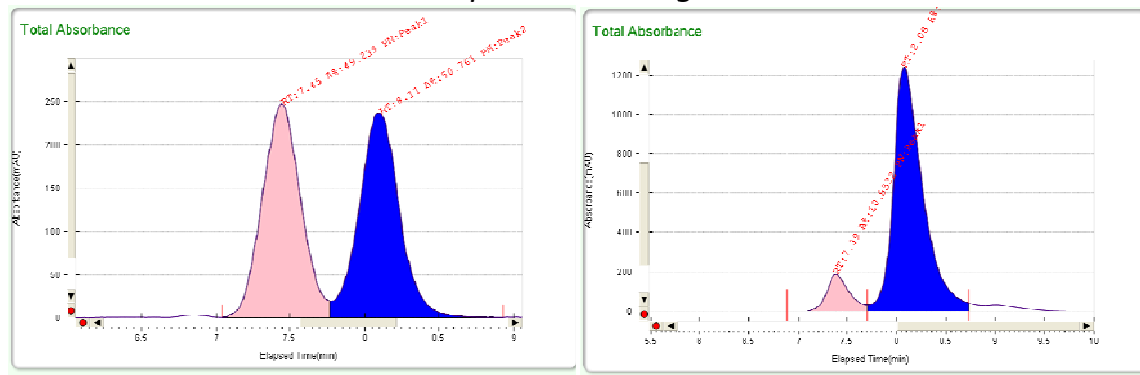

Acetophenone was separated according to previously published means.<sup>2</sup>

**Table 2.** Tabulated SFC enantiomeric ratio determination results for acetophenone.

| <b><u>Ligand</u></b> | <b><u>Peak 1</u></b> | <b><u>Peak 2</u></b> | <b><u>Ligand</u></b> | <b><u>Peak 1</u></b> | <b><u>Peak 2</u></b> |
|----------------------|----------------------|----------------------|----------------------|----------------------|----------------------|
| <b>L1</b>            | 20                   | 80                   | <b>L16</b>           | 21                   | 79                   |
| <b>L2</b>            | 21.5                 | 78.5                 | <b>L17</b>           | 25                   | 75                   |
| <b>L3</b>            | 24                   | 76                   | <b>L18</b>           | 29.5                 | 70.5                 |
| <b>L4</b>            | 90                   | 10                   | <b>L19</b>           | 95.5                 | 4.5                  |
| <b>L5</b>            | 29                   | 71                   | <b>L20</b>           | 42.5                 | 57.5                 |
| <b>L6</b>            | 22                   | 78                   | <b>L21</b>           | 39                   | 61                   |
| <b>L7</b>            | 19                   | 81                   | <b>L22</b>           | 43                   | 57                   |
| <b>L8</b>            | 18.5                 | 81.5                 | <b>L23</b>           | 46.5                 | 53.5                 |
| <b>L9</b>            | 92.5                 | 7.5                  | <b>L24</b>           | 77                   | 23                   |
| <b>L10</b>           | 31.5                 | 69.5                 | <b>L25</b>           | 59.5                 | 40.5                 |
| <b>L11</b>           | 16                   | 84                   | <b>L26</b>           | 78                   | 22                   |
| <b>L12</b>           | 18                   | 82                   | <b>L27</b>           | 88                   | 12                   |
| <b>L13</b>           | 21.5                 | 78.5                 | <b>L28</b>           | 88                   | 12                   |
| <b>L14</b>           | 92.5                 | 7.5                  | <b>L29</b>           | 91                   | 9                    |
| <b>L15</b>           | 29.5                 | 70.5                 |                      |                      |                      |

Methyl Ethyl Ketone was separated by gas chromatography with a chiral stationary phase. A J&W Scientific 19091G-B213 HP-Chiral-20B cyclcodex-B column was used. The length was 30m and I.D. was 0.320 mm. The run was isocratic at 45 °C and 0.6 mL/min flow rate for a 1  $\mu$ l injection. The average retention time was 33.5 min and 34.5 min.

**Table 3.** Tabulated GC enantiomeric ratio determination results for MEK.

| <b><u>Ligand</u></b> | <b><u>Peak 1</u></b> | <b><u>Peak 2</u></b> | <b><u>Ligand</u></b> | <b><u>Peak 1</u></b> | <b><u>Peak 2</u></b> |
|----------------------|----------------------|----------------------|----------------------|----------------------|----------------------|
| <b>L1</b>            | 34                   | 66                   | <b>L16</b>           | 34                   | 66                   |
| <b>L2</b>            | 37                   | 63                   | <b>L17</b>           | 38                   | 62                   |
| <b>L3</b>            | 32                   | 68                   | <b>L18</b>           | 38                   | 62                   |
| <b>L4</b>            | 50                   | 50                   | <b>L19</b>           | 62                   | 38                   |
| <b>L5</b>            | 35                   | 65                   | <b>L20</b>           | 43                   | 57                   |
| <b>L6</b>            | 30                   | 70                   | <b>L21</b>           | 45                   | 55                   |
| <b>L7</b>            | 33                   | 67                   | <b>L22</b>           | 47                   | 53                   |
| <b>L8</b>            | 32                   | 68                   | <b>L23</b>           | 50                   | 50                   |
| <b>L9</b>            | 54                   | 46                   | <b>L24</b>           | 55                   | 45                   |
| <b>L10</b>           | 36                   | 64                   | <b>L25</b>           | 53                   | 47                   |
| <b>L11</b>           | 32                   | 68                   | <b>L26</b>           | 50                   | 50                   |
| <b>L12</b>           | 33                   | 67                   | <b>L27</b>           | 54                   | 46                   |
| <b>L13</b>           | 34                   | 64                   | <b>L28</b>           | 57                   | 43                   |
| <b>L14</b>           | 56                   | 44                   | <b>L29</b>           | 63                   | 37                   |
| <b>L15</b>           | 38.5                 | 61.5                 |                      |                      |                      |

## Racemic

5-52\SIG222.D

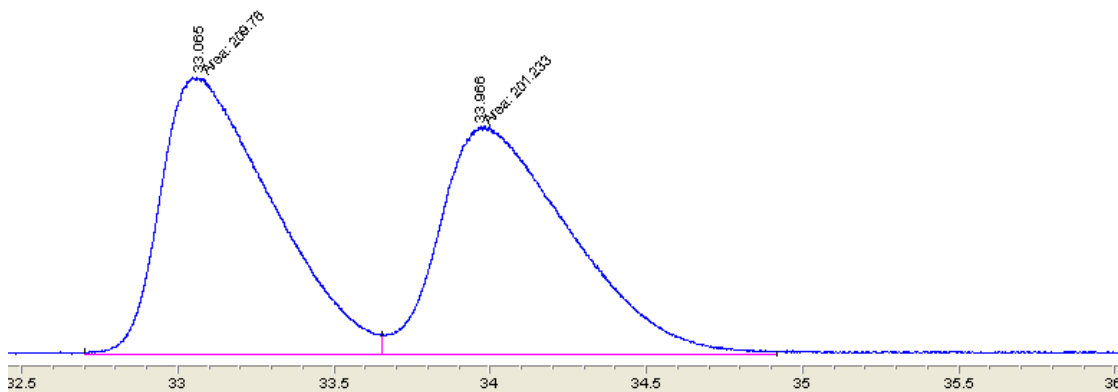

| # | Time   | Area  | Height | Width  | Area%  | Symmetry |
|---|--------|-------|--------|--------|--------|----------|
| 1 | 33.065 | 209.8 | 8.5    | 0.4136 | 51.037 | 0.411    |
| 2 | 33.966 | 201.2 | 6.9    | 0.4832 | 48.963 | 0.431    |

## Selective

20 10-05-52\SIG1000011.D

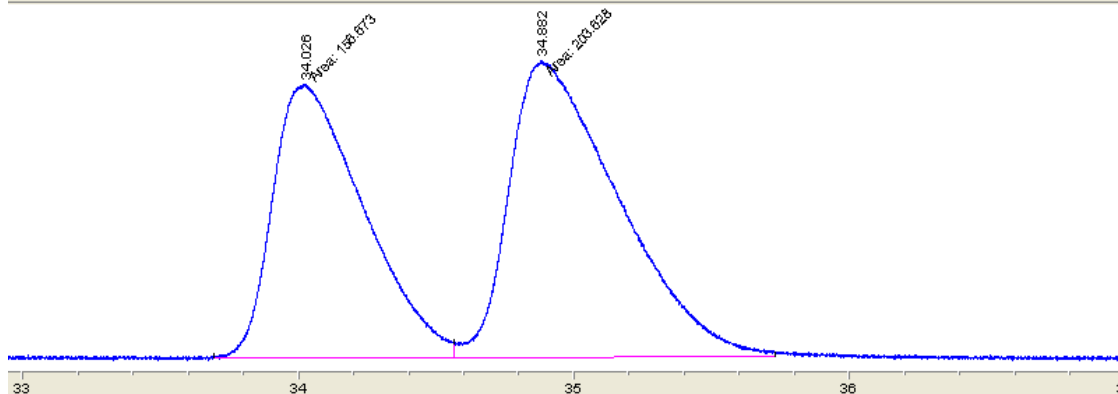

| # | Time   | Area  | Height | Width  | Area%  | Symmetry |
|---|--------|-------|--------|--------|--------|----------|
| 1 | 34.026 | 156.7 | 6.8    | 0.383  | 43.484 | 0        |
| 2 | 34.892 | 203.6 | 7.4    | 0.4596 | 56.516 | 0.41     |



**Graphical Representations:**

*Benzaldehyde 5×5*

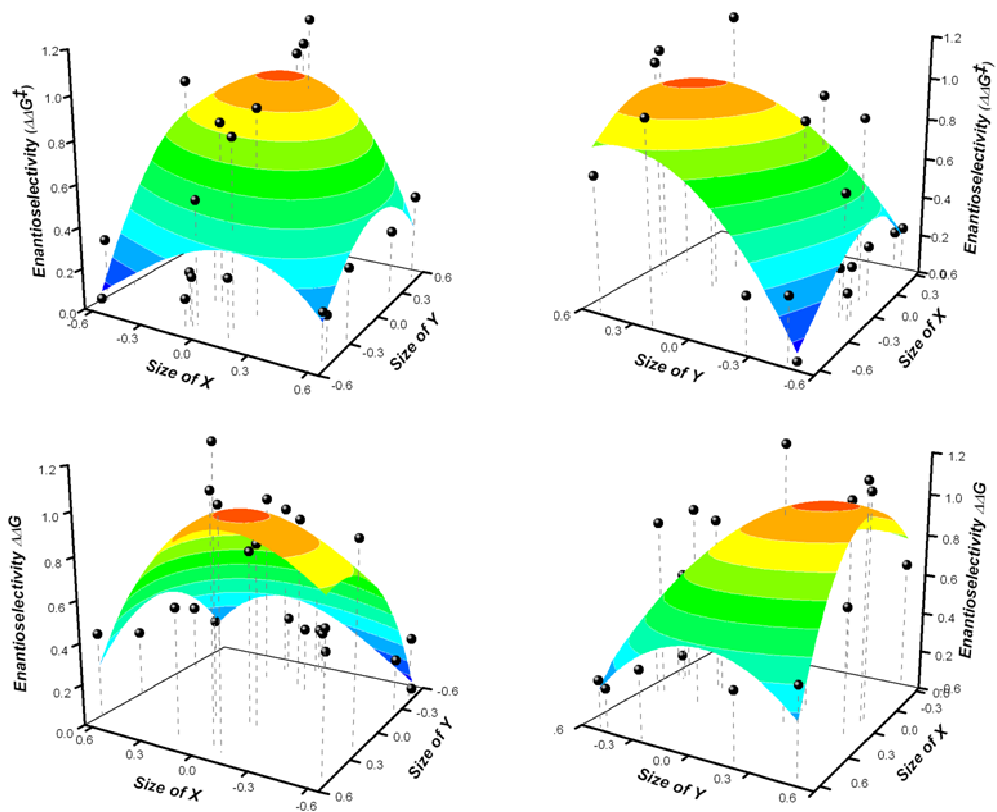

Sequential 90° Rotations

*Benzaldehyde 3×3*

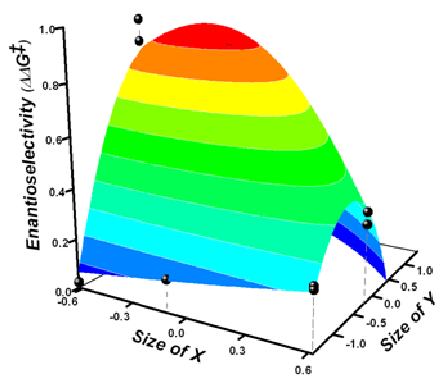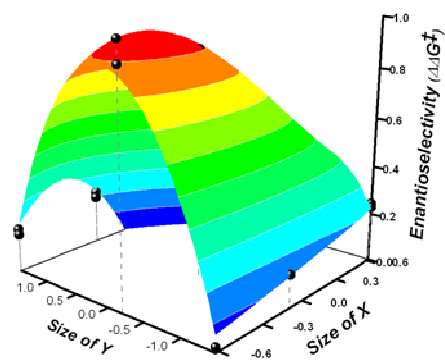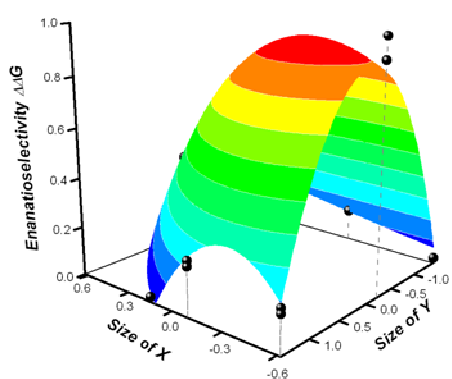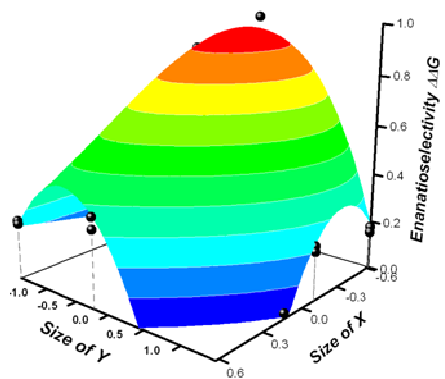

Sequential 90° Rotations

*Acetophenone 3×3*

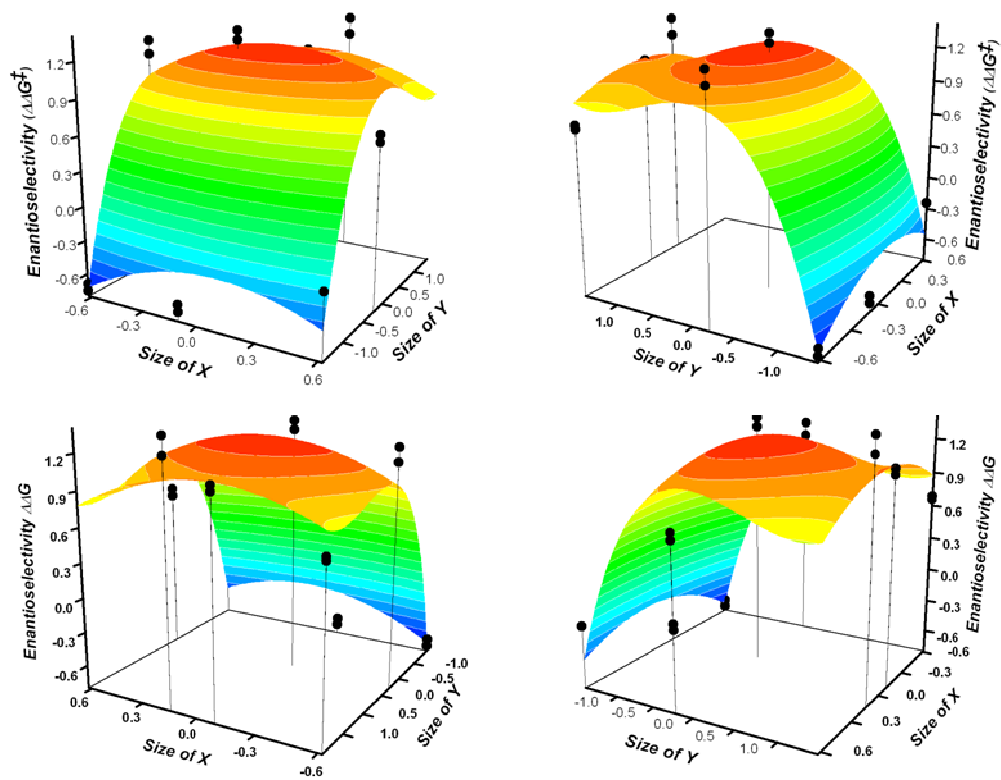

Sequential 90° Rotations

*Methyl Ethyl Ketone 3×3*

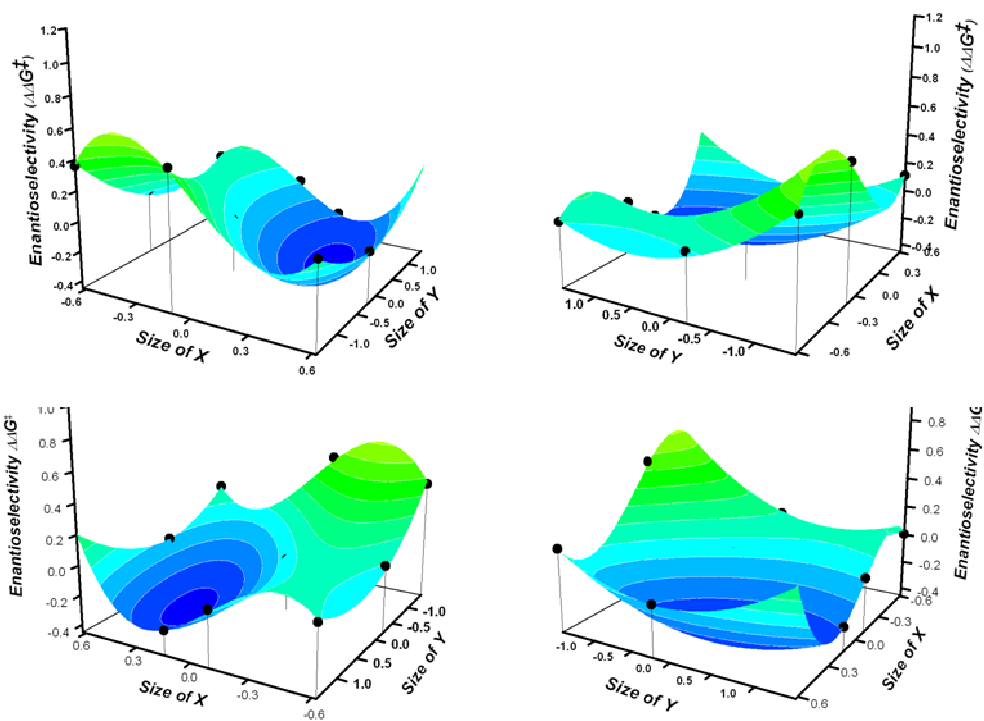

---

Sequential 90° Rotations

### Data & Statistical Analysis:<sup>7</sup>

A detailed step by step summary of how the model for the 3 x 3 prediction of the best catalyst for benzaldehyde will be given followed by summaries of the key statistics for the other models.

#### *3 x 3 Prediction of the Best Catalyst for Benzaldehyde*

##### DATA SET

| X Position | Adj. Charton Value | Y Position       | Adj. Charton Value | Delta G in Kcal/mol |
|------------|--------------------|------------------|--------------------|---------------------|
| H          | -0.62              | Me               | -1.45              | 0.0217              |
| H          | -0.62              | tBu              | -0.21              | 0.98475             |
| H          | -0.62              | CEt <sub>3</sub> | 1.45               | 0.1529              |
| Me         | -0.1               | Me               | -1.45              | 0.13082             |
| Me         | -0.1               | tBu              | -0.21              | 0.89955             |
| Me         | -0.1               | CEt <sub>3</sub> | 1.45               | 0.21996             |
| tBu        | 0.62               | Me               | -1.45              | 0.22901             |
| tBu        | 0.62               | tBu              | -0.21              | 0.35982             |
| iPr        | 0.14               | CEt <sub>3</sub> | 1.45               | 0.0217              |
| H          | -0.62              | Me               | -1.45              | 0.0217              |
| H          | -0.62              | tBu              | -0.21              | 0.89955             |
| H          | -0.62              | CEt <sub>3</sub> | 1.45               | 0.1751              |
| Me         | -0.1               | Me               | -1.45              | 0.13082             |
| Me         | -0.1               | tBu              | -0.21              | 0.82258             |
| Me         | -0.1               | CEt <sub>3</sub> | 1.45               | 0.19744             |
| tBu        | 0.62               | Me               | -1.45              | 0.24266             |
| tBu        | 0.62               | tBu              | -0.21              | 0.31212             |
| iPr        | 0.14               | CEt <sub>3</sub> | 1.45               | 0.0217              |

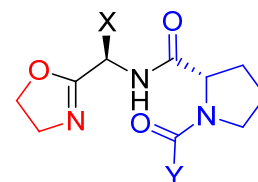

The data set consists of the 9 ligands listed but each replicate run is included in order to create enough degrees of freedom to create a polynomial model. To develop a linear least squares model first we must define a few matrices. The design matrix is the matrix where each row represents the values of the factor combinations used in each experiment:

| z0 | X     | Y     | X <sup>2</sup> | Y <sup>2</sup> | XY      | X <sup>3</sup> | Y <sup>3</sup> | YX <sup>2</sup> | XY <sup>2</sup> |
|----|-------|-------|----------------|----------------|---------|----------------|----------------|-----------------|-----------------|
| 1  | -0.62 | -1.45 | 0.3844         | 2.1025         | 0.899   | -0.23833       | -3.04863       | -0.55738        | -1.30355        |
| 1  | -0.62 | -0.21 | 0.3844         | 0.0441         | 0.1302  | -0.23833       | -0.00926       | -0.08072        | -0.02734        |
| 1  | -0.62 | 1.45  | 0.3844         | 2.1025         | -0.899  | -0.23833       | 3.048625       | 0.55738         | -1.30355        |
| 1  | -0.1  | -1.45 | 0.01           | 2.1025         | 0.145   | -0.001         | -3.04863       | -0.0145         | -0.21025        |
| 1  | -0.1  | -0.21 | 0.01           | 0.0441         | 0.021   | -0.001         | -0.00926       | -0.0021         | -0.00441        |
| 1  | -0.1  | 1.45  | 0.01           | 2.1025         | -0.145  | -0.001         | 3.048625       | 0.0145          | -0.21025        |
| 1  | 0.62  | -1.45 | 0.3844         | 2.1025         | -0.899  | 0.238328       | -3.04863       | -0.55738        | 1.30355         |
| 1  | 0.62  | -0.21 | 0.3844         | 0.0441         | -0.1302 | 0.238328       | -0.00926       | -0.08072        | 0.027342        |
| 1  | 0.14  | 1.45  | 0.0196         | 2.1025         | 0.203   | 0.002744       | 3.048625       | 0.02842         | 0.29435         |
| 1  | -0.62 | -1.45 | 0.3844         | 2.1025         | 0.899   | -0.23833       | -3.04863       | -0.55738        | -1.30355        |
| 1  | -0.62 | -0.21 | 0.3844         | 0.0441         | 0.1302  | -0.23833       | -0.00926       | -0.08072        | -0.02734        |
| 1  | -0.62 | 1.45  | 0.3844         | 2.1025         | -0.899  | -0.23833       | 3.048625       | 0.55738         | -1.30355        |
| 1  | -0.1  | -1.45 | 0.01           | 2.1025         | 0.145   | -0.001         | -3.04863       | -0.0145         | -0.21025        |
| 1  | -0.1  | -0.21 | 0.01           | 0.0441         | 0.021   | -0.001         | -0.00926       | -0.0021         | -0.00441        |
| 1  | -0.1  | 1.45  | 0.01           | 2.1025         | -0.145  | -0.001         | 3.048625       | 0.0145          | -0.21025        |
| 1  | 0.62  | -1.45 | 0.3844         | 2.1025         | -0.899  | 0.238328       | -3.04863       | -0.55738        | 1.30355         |
| 1  | 0.62  | -0.21 | 0.3844         | 0.0441         | -0.1302 | 0.238328       | -0.00926       | -0.08072        | 0.027342        |
| 1  | 0.14  | 1.45  | 0.0196         | 2.1025         | 0.203   | 0.002744       | 3.048625       | 0.02842         | 0.29435         |

The design matrix was created by taking each individual term and performing the mathematical function described at the top of the column. The column for  $x^2$  is simply the value of X for the ligand squared, for  $YX^2$  it is the value for Y multiplied by the value for  $(X^2)$ . It is important that the design matrix values match up with their corresponding  $\Delta\Delta G^\ddagger$  values in the response matrix, as we are essentially solving a system of equations. A response matrix is also created which consists of the measured enantiomeric ratios given as  $\Delta\Delta G^\ddagger$  values.

0.021702  
0.984751  
0.152897  
0.130825  
0.899549  
0.219955  
0.229012  
0.359821  
0.021702  
0.021702  
0.899549  
0.175097  
0.130825  
0.822582  
0.197442  
0.242656  
0.312121  
0.021702

The response matrix is given the designation Y and the design matrix given the designation X and the two are manipulated according to the least squares regression:

$$C = (X^T X)^{-1} (X^T Y)$$

Above C represents the solved matrix of coefficient values. For the values in the design matrix and response matrix above, the following C was calculated.

$$\begin{aligned} Z_0 &= 0.8481 \\ X &= -0.6502 \\ Y &= 0.1011 \\ X^2 &= -0.5049 \\ Y^2 &= -0.3302 \\ XY &= -0.2812 \\ X^3 &= 0.2625 \\ Y^3 &= -0.0391 \\ YX^2 &= -0.3313 \\ XY^2 &= 0.152 \end{aligned}$$

Which can be substituted into the original equation to give:

$$\Delta \Delta G^{\ddagger} = 0.8481 - .6502x + 0.1011y - 0.5049x^2 - 0.3302y^2 - 0.2812xy + 0.2625x^3 - 0.0391y^3 - 0.3313yx^2 - 0.152xy^2$$

The next step would be the calculation of each of the errors for each of the terms. Examination of the errors reveals which terms to eliminate. The variance and covariance matrix (V) for these coefficients can be calculated by the equation

$$V = (X^T X)^{-1}$$

For our example V =

|         |         |         |         |         |         |         |         |         |         |
|---------|---------|---------|---------|---------|---------|---------|---------|---------|---------|
| -0.0450 | 0.0000  | -0.2143 | -0.0000 | 0.0214  | -0.0000 | -0.0000 | 0.1019  | -0.0000 | -0.0000 |
| 0.0000  | 0.0000  | 0.0000  | -0.0000 | -0.0000 | -0.0000 | -0.0000 | -0.0000 | -0.0000 | -0.0000 |
| -0.2143 | 0.0000  | -1.0206 | -0.0000 | 0.1019  | -0.0000 | -0.0000 | 0.4854  | -0.0000 | -0.0000 |
| -0.0000 | -0.0000 | -0.0000 | 0.0000  | 0.0000  | 0.0000  | 0.0000  | 0.0000  | 0.0000  | 0.0000  |
| 0.0214  | -0.0000 | 0.1019  | 0.0000  | -0.0102 | 0.0000  | 0.0000  | 0.0000  | -0.0485 | 0.0000  |
| -0.0000 | -0.0000 | -0.0000 | 0.0000  | 0.0000  | 0.0000  | 0.0000  | 0.0000  | 0.0000  | 0.0000  |
| -0.0000 | -0.0000 | -0.0000 | 0.0000  | 0.0000  | 0.0000  | 0.0000  | 0.0000  | 0.0000  | 0.0000  |
| 0.1019  | -0.0000 | 0.4854  | 0.0000  | -0.0485 | 0.0000  | 0.0000  | -0.2309 | 0.0000  | 0.0000  |
| -0.0000 | -0.0000 | -0.0000 | 0.0000  | 0.0000  | 0.0000  | 0.0000  | 0.0000  | 0.0000  | 0.0000  |
| -0.0000 | -0.0000 | -0.0000 | 0.0000  | 0.0000  | 0.0000  | 0.0000  | 0.0000  | 0.0000  | 0.0000  |

The diagonal values highlighted along this matrix represent the non-scaled errors associated with each coefficient value. Overall, the lack of information on the diagonal represents an over fitting of the data (insufficient degrees of freedom to pass the *f* test for statistical significance). To simplify the model, all of the third order terms were removed to give a new design matrix:

| z0 | X     | y     | X <sup>2</sup> | Y <sup>2</sup> | XY      |
|----|-------|-------|----------------|----------------|---------|
| 1  | -0.62 | -1.45 | 0.3844         | 2.1025         | 0.899   |
| 1  | -0.62 | -0.21 | 0.3844         | 0.0441         | 0.1302  |
| 1  | -0.62 | 1.45  | 0.3844         | 2.1025         | -0.899  |
| 1  | -0.1  | -1.45 | 0.01           | 2.1025         | 0.145   |
| 1  | -0.1  | -0.21 | 0.01           | 0.0441         | 0.021   |
| 1  | -0.1  | 1.45  | 0.01           | 2.1025         | -0.145  |
| 1  | 0.62  | -1.45 | 0.3844         | 2.1025         | -0.899  |
| 1  | 0.62  | -0.21 | 0.3844         | 0.0441         | -0.1302 |
| 1  | 0.14  | 1.45  | 0.0196         | 2.1025         | 0.203   |
| 1  | -0.62 | -1.45 | 0.3844         | 2.1025         | 0.899   |
| 1  | -0.62 | -0.21 | 0.3844         | 0.0441         | 0.1302  |
| 1  | -0.62 | 1.45  | 0.3844         | 2.1025         | -0.899  |
| 1  | -0.1  | -1.45 | 0.01           | 2.1025         | 0.145   |
| 1  | -0.1  | -0.21 | 0.01           | 0.0441         | 0.021   |
| 1  | -0.1  | 1.45  | 0.01           | 2.1025         | -0.145  |
| 1  | 0.62  | -1.45 | 0.3844         | 2.1025         | -0.899  |
| 1  | 0.62  | -0.21 | 0.3844         | 0.0441         | -0.1302 |
| 1  | 0.14  | 1.45  | 0.0196         | 2.1025         | 0.203   |

The coefficient values were calculated for this matrix along with the same response matrix Y to give matrix C:

0.8396  
-0.3068  
-0.0663  
-0.5194  
-0.3184  
-0.2492

These values of coefficients give the following covariance matrix:

| z0      | X       | Y       | X <sup>2</sup> | Y <sup>2</sup> | XY      |
|---------|---------|---------|----------------|----------------|---------|
| 0.3120  | -0.0585 | -0.0275 | -0.5559        | -0.1044        | -0.0833 |
| -0.0585 | 0.3657  | 0.0523  | 0.3051         | 0.0281         | 0.1707  |
| -0.0275 | 0.0523  | 0.0561  | 0.1555         | 0.0046         | 0.0621  |
| -0.5559 | 0.3051  | 0.1555  | 2.2815         | 0.0860         | 0.3791  |
| -0.1044 | 0.0281  | 0.0046  | 0.0860         | 0.0640         | 0.0309  |
| -0.0833 | 0.1707  | 0.0621  | 0.3791         | 0.0309         | 0.3248  |

Analysis of this matrix shows that the X<sup>2</sup> term has the largest amount of error. Looking at the covariance we see that the X<sup>2</sup> term has a large degree of covariance with the offset or z0 term. Our first iteration we will eliminate this term giving a new design matrix:

| z0 | X     | Y     | Y <sup>2</sup> | XY     |
|----|-------|-------|----------------|--------|
| 1  | -0.62 | -1.45 | 2.1025         | 0.899  |
| 1  | -0.62 | -0.21 | 0.0441         | 0.1302 |
| 1  | -0.62 | 1.45  | 2.1025         | -0.899 |
| 1  | -0.1  | -1.45 | 2.1025         | 0.145  |
| 1  | -0.1  | -0.21 | 0.0441         | 0.021  |
| 1  | -0.1  | 1.45  | 2.1025         | -0.145 |



|   |       |       |        |         |
|---|-------|-------|--------|---------|
| 1 | 0.62  | -1.45 | 2.1025 | -0.899  |
| 1 | 0.62  | -0.21 | 0.0441 | -0.1302 |
| 1 | 0.14  | 1.45  | 2.1025 | 0.203   |
| 1 | -0.62 | -1.45 | 2.1025 | 0.899   |
| 1 | -0.62 | -0.21 | 0.0441 | 0.1302  |
| 1 | -0.62 | 1.45  | 2.1025 | -0.899  |
| 1 | -0.1  | -1.45 | 2.1025 | 0.145   |
| 1 | -0.1  | -0.21 | 0.0441 | 0.021   |
| 1 | -0.1  | 1.45  | 2.1025 | -0.145  |
| 1 | 0.62  | -1.45 | 2.1025 | -0.899  |
| 1 | 0.62  | -0.21 | 0.0441 | -0.1302 |
| 1 | 0.14  | 1.45  | 2.1025 | 0.203   |

The matrix of coefficients for this design matrix was:

$$z_0 = 0.7130$$

$$X = -0.2373$$

$$Y = -0.0309$$

$$Y^2 = -0.2988$$

$$XY = -0.1629$$

The covariance matrix was:

| <b>z0</b>     | <b>X</b>      | <b>Y</b>      | <b>Y<sup>2</sup></b> | <b>XY</b>     |
|---------------|---------------|---------------|----------------------|---------------|
| <b>0.1766</b> | 0.0159        | 0.0104        | -0.0835              | 0.0091        |
| 0.0159        | <b>0.3249</b> | 0.0315        | 0.0166               | 0.1201        |
| 0.0104        | 0.0315        | <b>0.0455</b> | -0.0012              | 0.0363        |
| -0.0835       | 0.0166        | -0.0012       | <b>0.0608</b>        | 0.0166        |
| 0.0091        | 0.1201        | 0.0363        | 0.0166               | <b>0.2618</b> |

Analysis of these matrices reveals that the X term has the largest error but a couple of other factors need to be considered the Y term has a large relative error and its coefficient value has a minimal effect on the overall model so elimination of this term gives the following design matrix:

| <b>z0</b> | <b>X</b> | <b>Y<sup>2</sup></b> | <b>XY</b> |
|-----------|----------|----------------------|-----------|
| 1         | -0.62    | 2.1025               | 0.899     |
| 1         | -0.62    | 0.0441               | 0.1302    |
| 1         | -0.62    | 2.1025               | -0.899    |
| 1         | -0.1     | 2.1025               | 0.145     |
| 1         | -0.1     | 0.0441               | 0.021     |
| 1         | -0.1     | 2.1025               | -0.145    |
| 1         | 0.62     | 2.1025               | -0.899    |
| 1         | 0.62     | 0.0441               | -0.1302   |
| 1         | 0.14     | 2.1025               | 0.203     |
| 1         | -0.62    | 2.1025               | 0.899     |
| 1         | -0.62    | 0.0441               | 0.1302    |
| 1         | -0.62    | 2.1025               | -0.899    |
| 1         | -0.1     | 2.1025               | 0.145     |
| 1         | -0.1     | 0.0441               | 0.021     |

|   |      |        |         |
|---|------|--------|---------|
| 1 | -0.1 | 2.1025 | -0.145  |
| 1 | 0.62 | 2.1025 | -0.899  |
| 1 | 0.62 | 0.0441 | -0.1302 |
| 1 | 0.14 | 2.1025 | 0.203   |

Which gives the following coefficients:

$$\begin{aligned} Z_0 &= 0.7200 \\ X &= -0.2159 \\ Y^2 &= -0.2997 \\ XY &= -0.1383 \end{aligned}$$

And the covariance matrix:

| z0      | X      | Y <sup>2</sup> | XY     |
|---------|--------|----------------|--------|
| 0.1742  | 0.0087 | -0.0832        | 0.0008 |
| 0.0087  | 0.3031 | 0.0174         | 0.0949 |
| -0.0832 | 0.0174 | 0.0607         | 0.0176 |
| 0.0008  | 0.0949 | 0.0176         | 0.2329 |

At this point reevaluating the model can prove helpful. Inclusion of each of the terms which have been eliminated until now shows that reinclusion of the X<sup>2</sup> term gives an overall decrease of error. The design matrix is now:

| z0 | X     | X <sup>2</sup> | Y <sup>2</sup> | XY      |
|----|-------|----------------|----------------|---------|
| 1  | -0.62 | 0.3844         | 2.1025         | 0.899   |
| 1  | -0.62 | 0.3844         | 0.0441         | 0.1302  |
| 1  | -0.62 | 0.3844         | 2.1025         | -0.899  |
| 1  | -0.1  | 0.01           | 2.1025         | 0.145   |
| 1  | -0.1  | 0.01           | 0.0441         | 0.021   |
| 1  | -0.1  | 0.01           | 2.1025         | -0.145  |
| 1  | 0.62  | 0.3844         | 2.1025         | -0.899  |
| 1  | 0.62  | 0.3844         | 0.0441         | -0.1302 |
| 1  | 0.14  | 0.0196         | 2.1025         | 0.203   |
| 1  | -0.62 | 0.3844         | 2.1025         | 0.899   |
| 1  | -0.62 | 0.3844         | 0.0441         | 0.1302  |
| 1  | -0.62 | 0.3844         | 2.1025         | -0.899  |
| 1  | -0.1  | 0.01           | 2.1025         | 0.145   |
| 1  | -0.1  | 0.01           | 0.0441         | 0.021   |
| 1  | -0.1  | 0.01           | 2.1025         | -0.145  |
| 1  | 0.62  | 0.3844         | 2.1025         | -0.899  |
| 1  | 0.62  | 0.3844         | 0.0441         | -0.1302 |
| 1  | 0.14  | 0.0196         | 2.1025         | 0.203   |

This design matrix gives the following matrix of coefficients:

$$\begin{aligned} Z_0 &= 0.8071 \\ X &= -0.2450 \\ X^2 &= -0.3358 \\ Y^2 &= -0.3130 \\ XY &= -0.1758 \end{aligned}$$

And the covariance matrix:

| z0      | X       | X <sup>2</sup> | Y <sup>2</sup> | XY      |
|---------|---------|----------------|----------------|---------|
| 0.2986  | -0.0328 | -0.0797        | -0.1022        | -0.0529 |
| -0.0328 | 0.3169  | 0.1601         | 0.0238         | 0.1128  |
| -0.0797 | 0.1601  | 0.8505         | 0.0732         | 0.2069  |
| -0.1022 | 0.0238  | 0.0732         | 0.0636         | 0.0258  |
| -0.0529 | 0.1128  | 0.2069         | 0.0258         | 0.2560  |

Evaluation of this shows a good model and systematic inclusion of the 3<sup>rd</sup> order terms reveals that inclusion of the  $YX^2$  term leads to the best overall model in terms of error.

| z0 | X     | X <sup>2</sup> | Y <sup>2</sup> | XY      | YX <sup>2</sup> |
|----|-------|----------------|----------------|---------|-----------------|
| 1  | -0.62 | 0.3844         | 2.1025         | 0.899   | -0.55738        |
| 1  | -0.62 | 0.3844         | 0.0441         | 0.1302  | -0.08072        |
| 1  | -0.62 | 0.3844         | 2.1025         | -0.899  | 0.55738         |
| 1  | -0.1  | 0.01           | 2.1025         | 0.145   | -0.0145         |
| 1  | -0.1  | 0.01           | 0.0441         | 0.021   | -0.0021         |
| 1  | -0.1  | 0.01           | 2.1025         | -0.145  | 0.0145          |
| 1  | 0.62  | 0.3844         | 2.1025         | -0.899  | -0.55738        |
| 1  | 0.62  | 0.3844         | 0.0441         | -0.1302 | -0.08072        |
| 1  | 0.14  | 0.0196         | 2.1025         | 0.203   | 0.02842         |
| 1  | -0.62 | 0.3844         | 2.1025         | 0.899   | -0.55738        |
| 1  | -0.62 | 0.3844         | 0.0441         | 0.1302  | -0.08072        |
| 1  | -0.62 | 0.3844         | 2.1025         | -0.899  | 0.55738         |
| 1  | -0.1  | 0.01           | 2.1025         | 0.145   | -0.0145         |
| 1  | -0.1  | 0.01           | 0.0441         | 0.021   | -0.0021         |
| 1  | -0.1  | 0.01           | 2.1025         | -0.145  | 0.0145          |
| 1  | 0.62  | 0.3844         | 2.1025         | -0.899  | -0.55738        |
| 1  | 0.62  | 0.3844         | 0.0441         | -0.1302 | -0.08072        |
| 1  | 0.14  | 0.0196         | 2.1025         | 0.203   | 0.02842         |

This design matrix give the coefficient matrix:

$$\begin{aligned} Z_0 &= 0.895 \\ X &= -0.489 \\ X^2 &= -0.813 \\ Y^2 &= -0.361 \\ XY &= -0.422 \\ YX^2 &= -0.571 \end{aligned}$$

And the covariance matrix:

| z0      | X       | X <sup>2</sup> | Y <sup>2</sup> | XY      | YX <sup>2</sup> |
|---------|---------|----------------|----------------|---------|-----------------|
| 0.3311  | -0.1221 | -0.6554        | -0.1197        | -0.1435 | -0.2100         |
| -0.1221 | 0.5617  | 0.6415         | 0.0718         | 0.3612  | 0.5758          |
| -0.6554 | 0.6415  | 0.7975         | 0.1676         | 0.6954  | 1.1325          |
| -0.1197 | 0.0718  | 0.1676         | 0.0730         | 0.0745  | 0.1129          |
| -0.1435 | 0.3612  | 0.6954         | 0.0745         | 0.5080  | 0.5843          |
| -0.2100 | 0.5758  | 1.1325         | 0.1129         | 0.5843  | 0.3544          |

Final Equation:

$$\Delta\Delta G^{\ddagger} = 0.895 - 0.489X - 0.813X^2 - 0.361Y^2 - 0.422XY - 0.571YX^2$$

Additional iterative manipulations were performed as above and this model resulted in the lowest error overall.

The following key statistics were calculated with this model

Sum of Square due to experimental error (SS<sub>pe</sub>):

0.0083

Sum of Squares due to Lack of Fit (SS<sub>lof</sub>)

0.0645

$$S_r^2 = 0.006$$

$$R^2 = 0.99$$

F test for goodness of fit gave

$$F_{(5,12)} = 61.6$$

This result is highly significant at the 95% confidence level

The error associated with any value can be calculated according to the following equation:

$$Z \pm (f * S_r^2 * (X_0 (X' * X)^{-1} X_0'))^{1/2}$$

Where Z is the estimated value given by the model equation,  $f$  is the appropriate Fisher value at the desired confidence interval and  $X_0$  is the row vector for the calculated factor level.

The reader is referred to the Table 1 of the manuscript for comparison of all the predicted values and all of the measured values along with the

*3 x 3 Acetophenone Model*

| X Position | Adj. Charton |  | Y Position | Adj. Charton |  | Delta G in Kcal/mol |
|------------|--------------|--|------------|--------------|--|---------------------|
|            | Value        |  |            | Value        |  |                     |
| H          | -0.62        |  | Me         | -1.45        |  | -0.78659            |
| H          | -0.62        |  | tBu        | -0.21        |  | -0.11392            |
| H          | -0.62        |  | CEt3       | 1.45         |  | 0.78659             |
| Me         | -0.1         |  | Me         | -1.45        |  | -0.78659            |
| Me         | -0.1         |  | tBu        | -0.21        |  | -0.11392            |
| Me         | -0.1         |  | CEt3       | 1.45         |  | 0.78659             |
| tBu        | 0.62         |  | Me         | -1.45        |  | -0.78659            |
| tBu        | 0.62         |  | tBu        | -0.21        |  | -0.11392            |
| iPr        | 0.14         |  | CEt3       | 1.45         |  | 0.78659             |
| H          | -0.62        |  | Me         | -1.45        |  | -0.78659            |
| H          | -0.62        |  | tBu        | -0.21        |  | -0.11392            |
| H          | -0.62        |  | CEt3       | 1.45         |  | 0.78659             |
| Me         | -0.1         |  | Me         | -1.45        |  | -0.78659            |
| Me         | -0.1         |  | tBu        | -0.21        |  | -0.11392            |
| Me         | -0.1         |  | CEt3       | 1.45         |  | 0.78659             |
| tBu        | 0.62         |  | Me         | -1.45        |  | -0.78659            |
| tBu        | 0.62         |  | tBu        | -0.21        |  | -0.11392            |
| iPr        | 0.14         |  | CEt3       | 1.45         |  | 0.78659             |

Final Design Matrix

| z0 | X     | X2     | Y2     | XY      | Y3       |
|----|-------|--------|--------|---------|----------|
| 1  | -0.62 | 0.3844 | 2.1025 | 0.899   | -3.04863 |
| 1  | -0.62 | 0.3844 | 0.0441 | 0.1302  | -0.00926 |
| 1  | -0.62 | 0.3844 | 2.1025 | -0.899  | 3.048625 |
| 1  | -0.1  | 0.01   | 2.1025 | 0.145   | -3.04863 |
| 1  | -0.1  | 0.01   | 0.0441 | 0.021   | -0.00926 |
| 1  | -0.1  | 0.01   | 2.1025 | -0.145  | 3.048625 |
| 1  | 0.62  | 0.3844 | 2.1025 | -0.899  | -3.04863 |
| 1  | 0.62  | 0.3844 | 0.0441 | -0.1302 | -0.00926 |
| 1  | 0.14  | 0.0196 | 2.1025 | 0.203   | 3.048625 |
| 1  | -0.62 | 0.3844 | 2.1025 | 0.899   | -3.04863 |
| 1  | -0.62 | 0.3844 | 0.0441 | 0.1302  | -0.00926 |
| 1  | -0.62 | 0.3844 | 2.1025 | -0.899  | 3.048625 |
| 1  | -0.1  | 0.01   | 2.1025 | 0.145   | -3.04863 |
| 1  | -0.1  | 0.01   | 0.0441 | 0.021   | -0.00926 |
| 1  | -0.1  | 0.01   | 2.1025 | -0.145  | 3.048625 |
| 1  | 0.62  | 0.3844 | 2.1025 | -0.899  | -3.04863 |
| 1  | 0.62  | 0.3844 | 0.0441 | -0.1302 | -0.00926 |
| 1  | 0.14  | 0.0196 | 2.1025 | 0.203   | 3.048625 |

Final Response Matrix

-0.75203  
 1.255091  
 0.686594  
 -0.71874  
 1.403217  
 1.080845  
 -0.24266  
 0.686594  
 1.403217  
 -0.68659  
 1.134177  
 0.65548  
 -0.65548  
 1.324914  
 1.031224  
 -0.24266  
 0.625301  
 1.255091

The Coefficient Matrix

1.2824  
 0.0335  
 -0.7240  
 -0.4322  
 -0.0730  
 0.2397

The uncorrected Variance-Covariance Matrix

|         |         |         |         |         |         |
|---------|---------|---------|---------|---------|---------|
| 0.3260  | -0.0695 | -0.5885 | -0.1093 | -0.0964 | -0.0187 |
| -0.0695 | 0.3657  | 0.3051  | 0.0333  | 0.1707  | 0.0249  |
| -0.5885 | 0.3051  | 0.2815  | 0.1016  | 0.3791  | 0.0739  |
| -0.1093 | 0.0333  | 0.1016  | 0.0655  | 0.0371  | 0.0049  |
| -0.0964 | 0.1707  | 0.3791  | 0.0371  | 0.3248  | 0.0295  |
| -0.0187 | 0.0249  | 0.0739  | 0.0049  | 0.0295  | 0.0127  |

Final Equation

$$\Delta\Delta G^\ddagger = 1.282 + 0.034X - 0.724X^2 - 0.432Y^2 - 0.073XY + 0.240Y$$

The following key statistics were calculated with this model

Sum of Square due to experimental error (SS<sub>pe</sub>):

0.029

Sum of Squares due to Lack of Fit (SS<sub>lor</sub>)

0.986

$$S_r^2 = 0.084$$

$$R^2 = 0.91$$

F test for goodness of fit gave

$$F_{(5,12)} = 24.77297$$

Significant at the 95% confidence interval.

Comparison of measured er to predicted er:

| <i>Measured</i> |    |                           | <i>Predicted</i> |    |                           |
|-----------------|----|---------------------------|------------------|----|---------------------------|
| R               | S  | $\Delta\Delta G^\ddagger$ | R                | S  | $\Delta\Delta G^\ddagger$ |
| 20              | 80 | -0.75203                  | 21               | 79 | -0.72296                  |
| 91              | 9  | 1.255091                  | 85               | 15 | 0.951836                  |
| 78              | 22 | 0.686594                  | 83               | 17 | 0.871631                  |
| 21              | 79 | -0.71874                  | 33               | 67 | -0.37918                  |
| 93              | 7  | 1.403217                  | 91               | 9  | 1.248553                  |
| 88              | 12 | 1.080845                  | 88               | 12 | 1.105335                  |
| 39              | 61 | -0.24266                  | 27               | 73 | -0.54955                  |
| 78              | 22 | 0.686594                  | 87               | 13 | 1.013005                  |
| 93              | 7  | 1.403217                  | 88               | 12 | 1.081141                  |
| 22              | 78 | -0.68659                  | 21               | 79 | -0.72296                  |
| 89              | 11 | 1.134177                  | 85               | 15 | 0.951836                  |
| 77              | 23 | 0.65548                   | 83               | 17 | 0.871631                  |
| 23              | 77 | -0.65548                  | 33               | 67 | -0.37918                  |
| 92              | 8  | 1.324914                  | 91               | 9  | 1.248553                  |
| 87              | 13 | 1.031224                  | 88               | 12 | 1.105335                  |
| 39              | 61 | -0.24266                  | 27               | 73 | -0.54955                  |
| 76              | 24 | 0.625301                  | 87               | 13 | 1.013005                  |
| 91              | 9  | 1.255091                  | 88               | 12 | 1.081141                  |

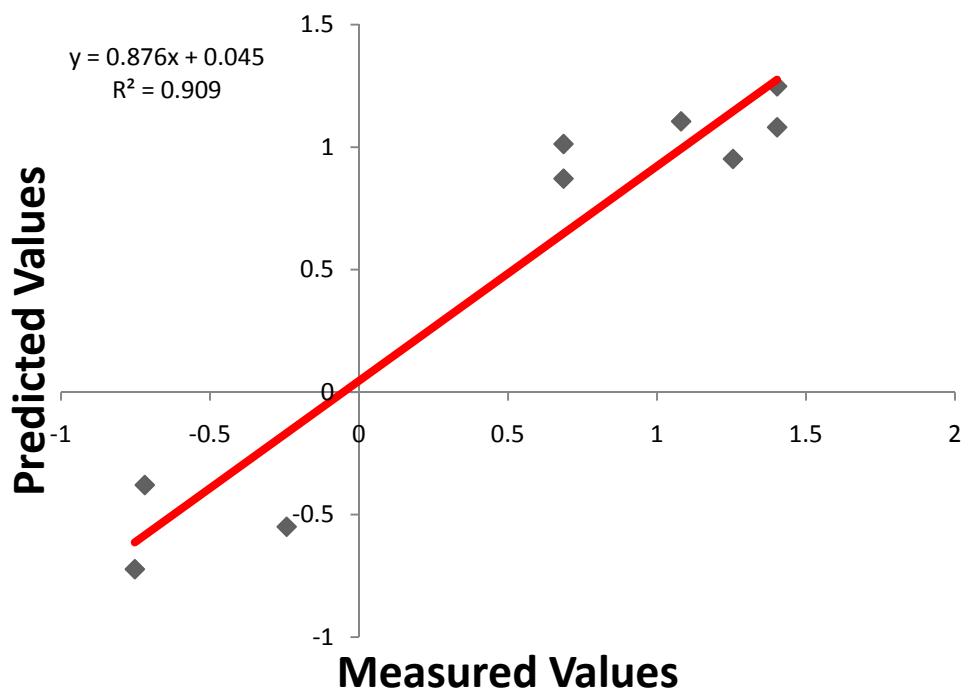

*MEK Allylation*

| X Position | Adj. Charton |  | Y Position | Adj. Charton |  | Delta G in Kcal/mol |
|------------|--------------|--|------------|--------------|--|---------------------|
|            | Value        |  |            | Value        |  |                     |
| H          | -0.62        |  | Me         | -1.45        |  | 0.359821            |
| H          | -0.62        |  | tBu        | -0.21        |  | 0                   |
| H          | -0.62        |  | CEt3       | 1.45         |  | 0                   |
| Me         | -0.1         |  | Me         | -1.45        |  | 0.459639            |
| Me         | -0.1         |  | tBu        | -0.21        |  | -0.08698            |
| Me         | -0.1         |  | CEt3       | 1.45         |  | -0.08698            |
| tBu        | 0.62         |  | Me         | -1.45        |  | 0.108859            |
| tBu        | 0.62         |  | tBu        | -0.21        |  | -0.10886            |
| iPr        | 0.14         |  | CEt3       | 1.45         |  | -0.28871            |
| H          | -0.62        |  | Me         | -1.45        |  | 0.359821            |
| H          | -0.62        |  | tBu        | -0.21        |  | 0                   |
| H          | -0.62        |  | CEt3       | 1.45         |  | 0                   |
| Me         | -0.1         |  | Me         | -1.45        |  | 0.459639            |
| Me         | -0.1         |  | tBu        | -0.21        |  | -0.08698            |
| Me         | -0.1         |  | CEt3       | 1.45         |  | -0.08698            |
| tBu        | 0.62         |  | Me         | -1.45        |  | 0.108859            |
| tBu        | 0.62         |  | tBu        | -0.21        |  | -0.10886            |
| iPr        | 0.14         |  | CEt3       | 1.45         |  | -0.28871            |

Final Design Matrix

| z0 | X     | Y     | X <sup>2</sup> | Y <sup>2</sup> | XY      | X <sup>3</sup> | YX <sup>2</sup> |
|----|-------|-------|----------------|----------------|---------|----------------|-----------------|
| 1  | -0.62 | -1.45 | 0.3844         | 2.1025         | 0.899   | -0.23833       | -0.55738        |
| 1  | -0.62 | -0.21 | 0.3844         | 0.0441         | 0.1302  | -0.23833       | -0.08072        |
| 1  | -0.62 | 1.45  | 0.3844         | 2.1025         | -0.899  | -0.23833       | 0.55738         |
| 1  | -0.1  | -1.45 | 0.01           | 2.1025         | 0.145   | -0.001         | -0.0145         |
| 1  | -0.1  | -0.21 | 0.01           | 0.0441         | 0.021   | -0.001         | -0.0021         |
| 1  | -0.1  | 1.45  | 0.01           | 2.1025         | -0.145  | -0.001         | 0.0145          |
| 1  | 0.62  | -1.45 | 0.3844         | 2.1025         | -0.899  | 0.238328       | -0.55738        |
| 1  | 0.62  | -0.21 | 0.3844         | 0.0441         | -0.1302 | 0.238328       | -0.08072        |
| 1  | 0.14  | 1.45  | 0.0196         | 2.1025         | 0.203   | 0.002744       | 0.02842         |
| 1  | -0.62 | -1.45 | 0.3844         | 2.1025         | 0.899   | -0.23833       | -0.55738        |
| 1  | -0.62 | -0.21 | 0.3844         | 0.0441         | 0.1302  | -0.23833       | -0.08072        |
| 1  | -0.62 | 1.45  | 0.3844         | 2.1025         | -0.899  | -0.23833       | 0.55738         |
| 1  | -0.1  | -1.45 | 0.01           | 2.1025         | 0.145   | -0.001         | -0.0145         |
| 1  | -0.1  | -0.21 | 0.01           | 0.0441         | 0.021   | -0.001         | -0.0021         |
| 1  | -0.1  | 1.45  | 0.01           | 2.1025         | -0.145  | -0.001         | 0.0145          |
| 1  | 0.62  | -1.45 | 0.3844         | 2.1025         | -0.899  | 0.238328       | -0.55738        |
| 1  | 0.62  | -0.21 | 0.3844         | 0.0441         | -0.1302 | 0.238328       | -0.08072        |
| 1  | 0.14  | 1.45  | 0.0196         | 2.1025         | 0.203   | 0.002744       | 0.02842         |



Final Response Matrix

0.359821  
 0  
 0  
 0.459639  
 -0.08698  
 -0.08698  
 0.108859  
 -0.10886  
 -0.28871  
 0.359821  
 0  
 0  
 0.459639  
 -0.08698  
 -0.08698  
 0.108859  
 -0.10886  
 -0.28871

Coefficients and Associated Errors

**Coeff**  
 -0.200  
 -1.03628  
 -0.1773  
 0.2938  
 0.1260  
 0.1286  
 2.6119  
 0.3412

Final Equation

$$\Delta\Delta G^\ddagger = -0.200 -1.036X -0.177Y +0.294X^2 +0.126Y^2 +0.129XY +2.6120X^3 +0.341YX^2$$

The following key statistics were calculated with this model

Sum of Square due to experimental error (SS<sub>pe</sub>):

0.00

Sum of Squares due to Lack of Fit (SS<sub>lof</sub>)

0.986

$$S_r^2 = 0.0008$$

$$R^2 = 0.98$$

F test for goodness of fit gave

$$F_{(5,9)} = 131$$

Highly significant at the 95% confidence interval.

\

| <i>Measured</i> |    |                           | <i>Predicted</i> |    |                           |
|-----------------|----|---------------------------|------------------|----|---------------------------|
| R               | S  | $\Delta\Delta G^\ddagger$ | R                | S  | $\Delta\Delta G^\ddagger$ |
| 34              | 66 | 0.359821                  | 67               | 33 | 0.38029                   |
| 50              | 50 | 0                         | 48               | 52 | -0.03518                  |
| 50              | 50 | 0                         | 51               | 49 | 0.015181                  |
| 30              | 70 | 0.459639                  | 69               | 31 | 0.439254                  |
| 54              | 46 | -0.08698                  | 48               | 52 | -0.05135                  |
| 54              | 46 | -0.08698                  | 45               | 55 | -0.10157                  |
| 45              | 55 | 0.108859                  | 55               | 45 | 0.108734                  |
| 55              | 45 | -0.10886                  | 45               | 55 | -0.10839                  |
| 63              | 37 | -0.28871                  | 37               | 63 | -0.28797                  |
| 34              | 66 | 0.359821                  | 67               | 33 | 0.38029                   |
| 50              | 50 | 0                         | 48               | 52 | -0.03518                  |
| 50              | 50 | 0                         | 51               | 49 | 0.015181                  |
| 30              | 70 | 0.459639                  | 69               | 31 | 0.439254                  |
| 54              | 46 | -0.08698                  | 48               | 52 | -0.05135                  |
| 54              | 46 | -0.08698                  | 45               | 55 | -0.10157                  |
| 45              | 55 | 0.108859                  | 55               | 45 | 0.108734                  |
| 55              | 45 | -0.10886                  | 45               | 55 | -0.10839                  |
| 63              | 37 | -0.28871                  | 37               | 63 | -0.28797                  |

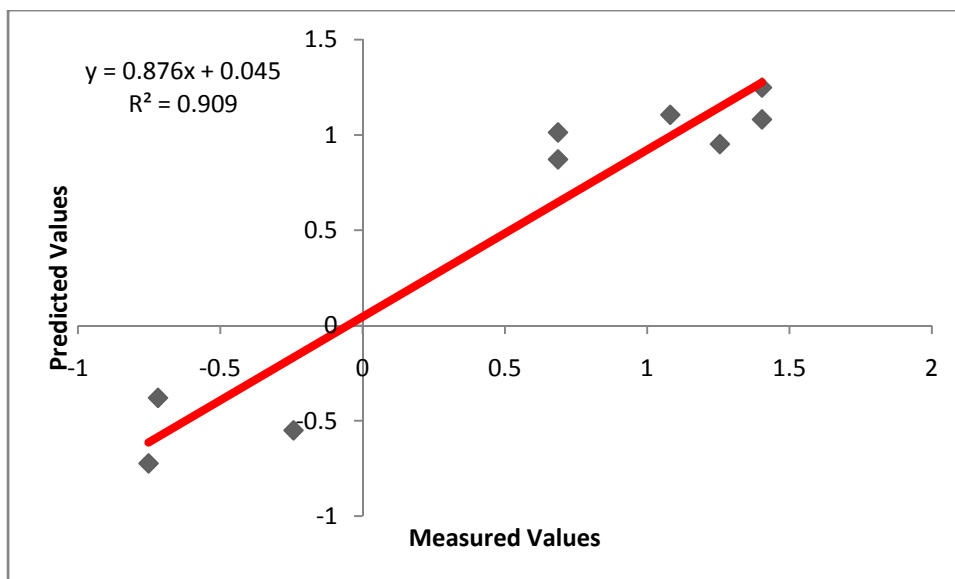

*5x5 Benzaldehyde*

| X Pos.      | Adj. Charton |             | Adj. Charton |          |
|-------------|--------------|-------------|--------------|----------|
|             | Value        | Y Pos.      | Value        | Delta G  |
| H           | -0.62        | Me          | -0.51        | 0.021702 |
| H           | -0.62        | Et          | -0.47        | 0.300384 |
| H           | -0.62        | <i>i</i> Pr | -0.27        | 0.254084 |
| H           | -0.62        | <i>t</i> Bu | 0.21         | 0.940979 |
| H           | -0.62        | Hep         | 0.51         | 0.64638  |
| Me          | -0.1         | Me          | -0.51        | 0.130825 |
| Me          | -0.1         | Et          | -0.47        | 0.242656 |
| Me          | -0.1         | <i>i</i> Pr | -0.27        | 0.32393  |
| Me          | -0.1         | <i>t</i> Bu | 0.21         | 0.860165 |
| Me          | -0.1         | Hep         | 0.51         | 1.080845 |
| Et          | -0.06        | Me          | -0.51        | 0.242656 |
| Et          | -0.06        | Et          | -0.47        | 0.5816   |
| Et          | -0.06        | <i>i</i> Pr | -0.27        | 0.879617 |
| Et          | -0.06        | <i>t</i> Bu | 0.21         | 0.822582 |
| Et          | -0.06        | Hep         | 0.51         | 1.134177 |
| <i>i</i> Pr | 0.14         | Me          | -0.51        | 0.277111 |
| <i>i</i> Pr | 0.14         | Et          | -0.47        | 0.879617 |
| <i>i</i> Pr | 0.14         | <i>i</i> Pr | -0.27        | 0.962552 |
| <i>i</i> Pr | 0.14         | <i>t</i> Bu | 0.21         | 1.289071 |
| <i>i</i> Pr | 0.14         | Hep         | 0.51         | 0.616416 |
| <i>t</i> Bu | 0.62         | Me          | -0.51        | 0.229012 |
| <i>t</i> Bu | 0.62         | Et          | -0.47        | 0.197442 |
| <i>t</i> Bu | 0.62         | <i>i</i> Pr | -0.27        | 0.329862 |
| <i>t</i> Bu | 0.62         | <i>t</i> Bu | 0.21         | 0.335814 |
| <i>t</i> Bu | 0.62         | Hep         | 0.51         | 0.42142  |

Design Matrix

| Z0 | Y     | X <sup>2</sup> | Y <sup>2</sup> | XY      | X <sup>3</sup> | YX <sup>2</sup> |
|----|-------|----------------|----------------|---------|----------------|-----------------|
| 1  | -0.51 | 0.3844         | 0.2601         | 0.3162  | -0.23833       | -0.19604        |
| 1  | -0.47 | 0.3844         | 0.2209         | 0.2914  | -0.23833       | -0.18067        |
| 1  | -0.27 | 0.3844         | 0.0729         | 0.1674  | -0.23833       | -0.10379        |
| 1  | 0.21  | 0.3844         | 0.0441         | -0.1302 | -0.23833       | 0.080724        |
| 1  | 0.51  | 0.3844         | 0.2601         | -0.3162 | -0.23833       | 0.196044        |
| 1  | -0.51 | 0.01           | 0.2601         | 0.051   | -0.001         | -0.0051         |
| 1  | -0.47 | 0.01           | 0.2209         | 0.047   | -0.001         | -0.0047         |
| 1  | -0.27 | 0.01           | 0.0729         | 0.027   | -0.001         | -0.0027         |
| 1  | 0.21  | 0.01           | 0.0441         | -0.021  | -0.001         | 0.0021          |
| 1  | 0.51  | 0.01           | 0.2601         | -0.051  | -0.001         | 0.0051          |
| 1  | -0.51 | 0.0036         | 0.2601         | 0.0306  | -0.00022       | -0.00184        |
| 1  | -0.47 | 0.0036         | 0.2209         | 0.0282  | -0.00022       | -0.00169        |
| 1  | -0.27 | 0.0036         | 0.0729         | 0.0162  | -0.00022       | -0.00097        |
| 1  | 0.21  | 0.0036         | 0.0441         | -0.0126 | -0.00022       | 0.000756        |
| 1  | 0.51  | 0.0036         | 0.2601         | -0.0306 | -0.00022       | 0.001836        |
| 1  | -0.51 | 0.0196         | 0.2601         | -0.0714 | 0.002744       | -0.01           |
| 1  | -0.47 | 0.0196         | 0.2209         | -0.0658 | 0.002744       | -0.00921        |
| 1  | -0.27 | 0.0196         | 0.0729         | -0.0378 | 0.002744       | -0.00529        |
| 1  | 0.21  | 0.0196         | 0.0441         | 0.0294  | 0.002744       | 0.004116        |
| 1  | 0.51  | 0.0196         | 0.2601         | 0.0714  | 0.002744       | 0.009996        |
| 1  | -0.51 | 0.3844         | 0.2601         | -0.3162 | 0.238328       | -0.19604        |
| 1  | -0.47 | 0.3844         | 0.2209         | -0.2914 | 0.238328       | -0.18067        |
| 1  | -0.27 | 0.3844         | 0.0729         | -0.1674 | 0.238328       | -0.10379        |
| 1  | 0.21  | 0.3844         | 0.0441         | 0.1302  | 0.238328       | 0.080724        |
| 1  | 0.51  | 0.3844         | 0.2601         | 0.3162  | 0.238328       | 0.196044        |

Response Matrix

0.021702  
0.300384  
0.254084  
0.940979  
0.64638  
0.130825  
0.242656  
0.32393  
0.860165  
1.080845  
0.242656  
0.5816  
0.879617  
0.822582  
1.134177  
0.277111  
0.879617  
0.962552  
1.289071  
0.616416  
0.229012  
0.197442  
0.329862  
0.335814  
0.42142

Coefficient Matrix

0.9311  
0.5757  
-0.9053  
-1.0053  
-0.5018  
-0.4069  
-0.4751

Covariance Matrix

|         |         |         |         |         |         |         |
|---------|---------|---------|---------|---------|---------|---------|
| 0.2066  | 0.0242  | -0.2051 | -0.7764 | -0.0002 | -0.0009 | -0.1267 |
| 0.0242  | 0.4451  | -0.1267 | 0.1338  | 0.0132  | 0.0037  | -0.1954 |
| -0.2051 | -0.1267 | 0.2786  | 0.0000  | 0.0005  | 0.0023  | 0.7897  |
| -0.7764 | 0.1338  | 0.0000  | 0.6065  | 0.0000  | 0.0000  | 0.0000  |
| -0.0002 | 0.0132  | 0.0005  | 0.0000  | 0.5512  | 0.4284  | -0.0439 |
| -0.0009 | 0.0037  | 0.0023  | 0.0000  | 0.4284  | 0.8788  | -0.0121 |
| -0.1267 | -0.1954 | 0.7897  | 0.0000  | -0.0439 | -0.0121 | 0.4513  |

$$\Delta\Delta G^\ddagger = 0.931 + 0.576Y - 0.905X^2 - 1.005Y^2 - 0.502XY - 0.407X^3 - 0.475YX^2$$

The following key statistics were calculated with this model

Sum of Square due to experimental error (SS<sub>pe</sub>):

0.029

Sum of Squares due to Lack of Fit (SS<sub>lof</sub>)

0.872

S<sub>r</sub><sup>2</sup> = 0.021

R<sup>2</sup> = 0.64

F test for goodness of fit gave

F<sub>(5, 9)</sub> = 16.1

Significant at the 90% confidence interval.

| <i>Substituent</i> |          | <i>Measured</i> |          |                                             | <i>Predicted</i> |          |                                             |
|--------------------|----------|-----------------|----------|---------------------------------------------|------------------|----------|---------------------------------------------|
| <b>X</b>           | <b>Y</b> | <b>R</b>        | <b>S</b> | <b><math>\Delta\Delta G^\ddagger</math></b> | <b>R</b>         | <b>S</b> | <b><math>\Delta\Delta G^\ddagger</math></b> |
| H                  | Me       | 49              | 51       | 0.021702                                    | 47               | 53       | 0.059345                                    |
| H                  | Et       | 37              | 64       | 0.300384                                    | 44               | 56       | 0.126927                                    |
| H                  | iPr      | 39              | 62       | 0.254084                                    | 32               | 68       | 0.416597                                    |
| H                  | tBu      | 15              | 85       | 0.940979                                    | 19               | 81       | 0.783773                                    |
| H                  | Hep      | 22              | 73       | 0.64638                                     | 22               | 78       | 0.681496                                    |
| Me                 | Me       | 44              | 56       | 0.130825                                    | 35               | 65       | 0.344017                                    |
| Me                 | Et       | 39              | 61       | 0.242656                                    | 32               | 68       | 0.408271                                    |
| Me                 | iPr      | 36              | 65       | 0.32393                                     | 22               | 78       | 0.681301                                    |
| Me                 | tBu      | 17              | 83       | 0.860165                                    | 13               | 87       | 1.008541                                    |
| Me                 | Hep      | 12              | 88       | 1.080845                                    | 14               | 86       | 0.977577                                    |
| Et                 | Me       | 39              | 61       | 0.242656                                    | 34               | 66       | 0.35818                                     |
| Et                 | Et       | 26              | 75       | 0.5816                                      | 31               | 69       | 0.421753                                    |
| Et                 | iPr      | 17              | 84       | 0.879617                                    | 22               | 78       | 0.691375                                    |
| Et                 | tBu      | 18              | 82       | 0.822582                                    | 13               | 87       | 1.010436                                    |
| Et                 | Hep      | 11              | 89       | 1.134177                                    | 14               | 86       | 0.973474                                    |
| iPr                | Me       | 38              | 63       | 0.277111                                    | 32               | 68       | 0.397576                                    |
| iPr                | Et       | 17              | 84       | 0.879617                                    | 30               | 70       | 0.456828                                    |
| iPr                | iPr      | 15              | 86       | 0.962552                                    | 21               | 79       | 0.70485                                     |
| iPr                | tBu      | 9               | 92       | 1.289071                                    | 14               | 86       | 0.972071                                    |
| iPr                | Hep      | 24              | 76       | 0.616416                                    | 18               | 82       | 0.808031                                    |
| tBu                | Me       | 40              | 60       | 0.229012                                    | 42               | 58       | 0.182811                                    |
| tBu                | Et       | 41              | 59       | 0.197442                                    | 40               | 60       | 0.225494                                    |
| tBu                | iPr      | 35              | 65       | 0.329862                                    | 33               | 67       | 0.390668                                    |
| tBu                | tBu      | 35              | 65       | 0.335814                                    | 30               | 70       | 0.459054                                    |
| tBu                | Hep      | 32              | 69       | 0.42142                                     | 34               | 66       | 0.363624                                    |

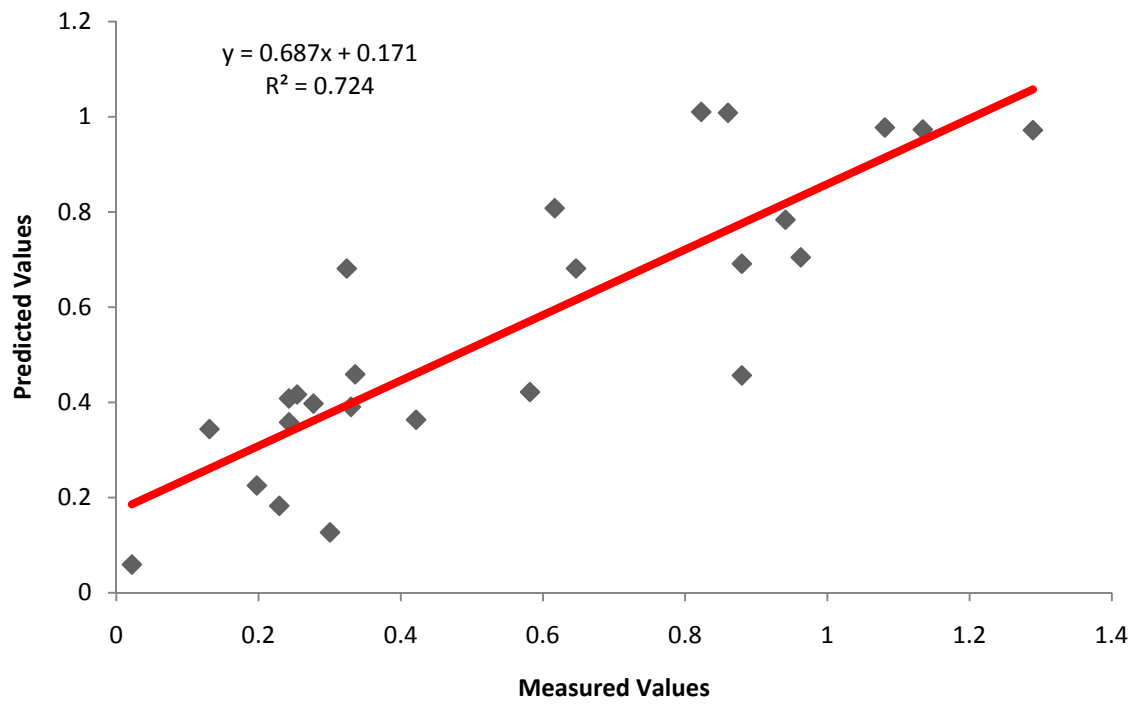

### References:

- (1) Miller, J. J.; Rajaram, S.; Pfaffenroth, C.; Sigman, M. S. (2009) Synthesis of amine functionalized oxazolines with applications in asymmetric catalysis. *Tetrahedron* 65: 3110-3119.
- (2) Miller, J. J.; Sigman, M. S. (2008) Quantitatively Correlating the Effect of Ligand-Substituent Size in Asymmetric Catalysis Using Linear Free Energy Relationships. *Angew. Chem., Int. Ed.* 47: 771-774.
- (3) Rajaram, S.; Sigman, M. S. (2005) Design of Hydrogen Bond Catalysts Based on a Modular Oxazoline Template: Application to an Enantioselective Hetero Diels–Alder Reaction. *Org. Lett.* 7: 5473-5475.
- (4) Miller, J. J.; Sigman, M. S. (2007) Design and Synthesis of Modular Oxazoline Ligands for the Enantioselective Chromium-Catalyzed Addition of Allyl Bromide to Ketones. *J. Am. Chem. Soc.* 129: 2752-2753.
- (5) All carbons were not observed in the  $^{13}\text{C}$  NMR even with increased delay times ( $d_1 = 25$  sec) and extended experiment length ( $> 12\text{h}$ ) and increased concentration.
- (6) Wadamoto, M.; Ozasa, N.; Yanagisawa, A.; Yamamoto, H. *J. Org. Chem.* **2003**, 68, 5593-5601.
- (7) (a) Deming, S. N.; Morgan, S. L. (1993) *Experimental design: a chemometric approach; Data Handling in Science and Technology, Vol. 11*, (Elsevier: Amsterdam-London-New York-Tokyo). (b) Deming, S. N. (1983) *Chemometrics. Mathematics and Statistics in Chemistry*, ed. Kowalski, B. R. (D. Riedel Publishing Company, Dordrecht) pp. 267-304. (c) Argawal, A. K.; Brisk, M. L. (1985) Sequential Experimental Design for Precise Parameter Estimation. *Ind. Eng. Chem. Process. Des. Dev.* 24: 203-210. (d) Issanchou, S.; Cognet, P.; Cabassud, M. (2005) Sequential Experimental Design Strategy for Rapid Kinetic Modeling of Chemical Synthesis. *AIChE J.* 51: 1773-1781.
- (8) Ligands **L21-L25** were synthesized as their opposite enantiomer due to the prohibitive cost of D-TLE. The sign of the reported values were changed (in terms of  $\Delta\Delta G^\ddagger$ ) to account for this.



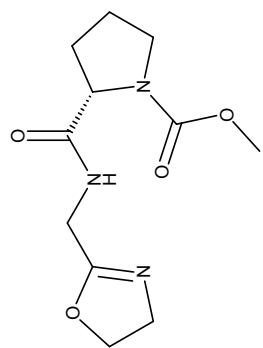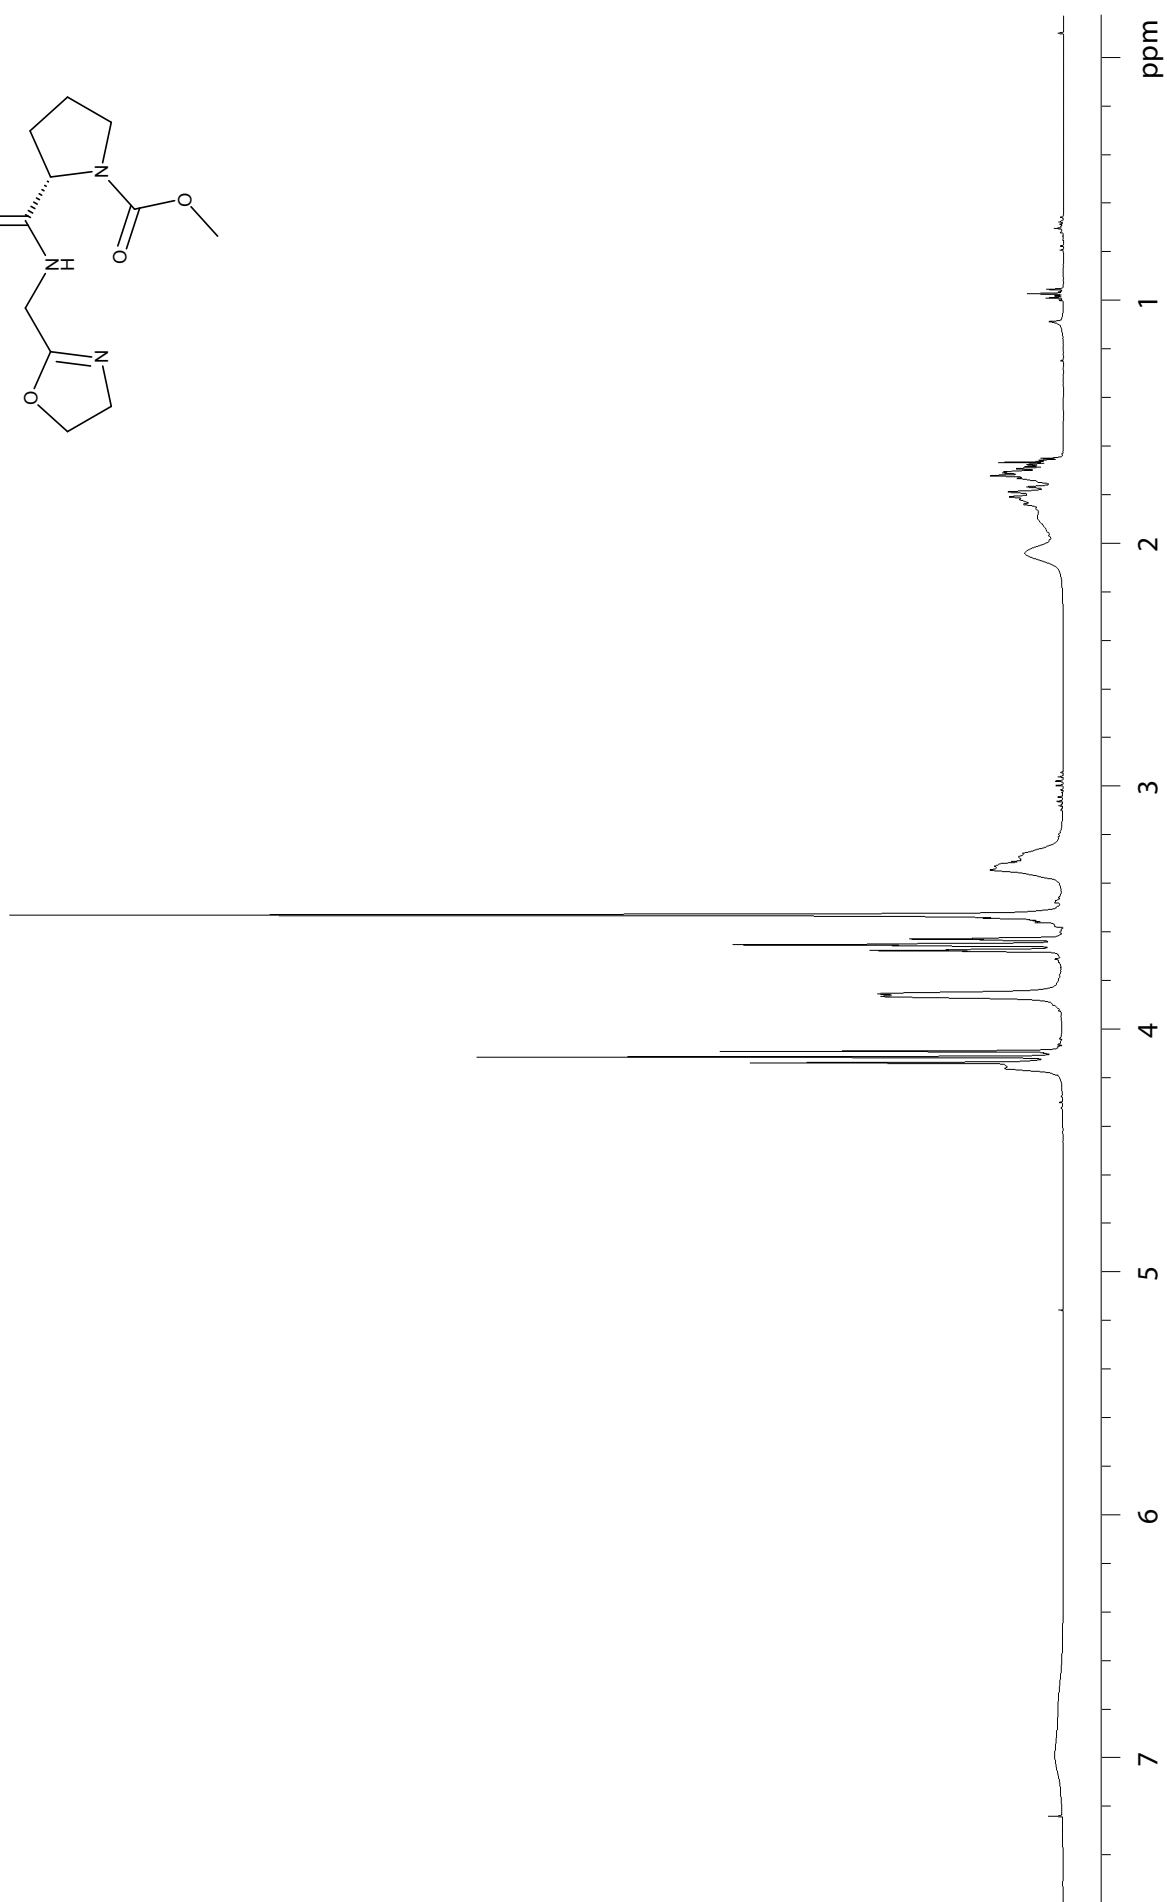

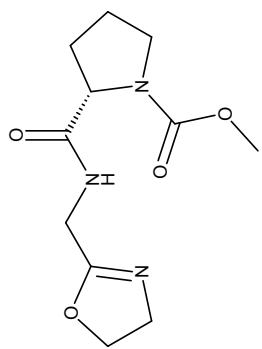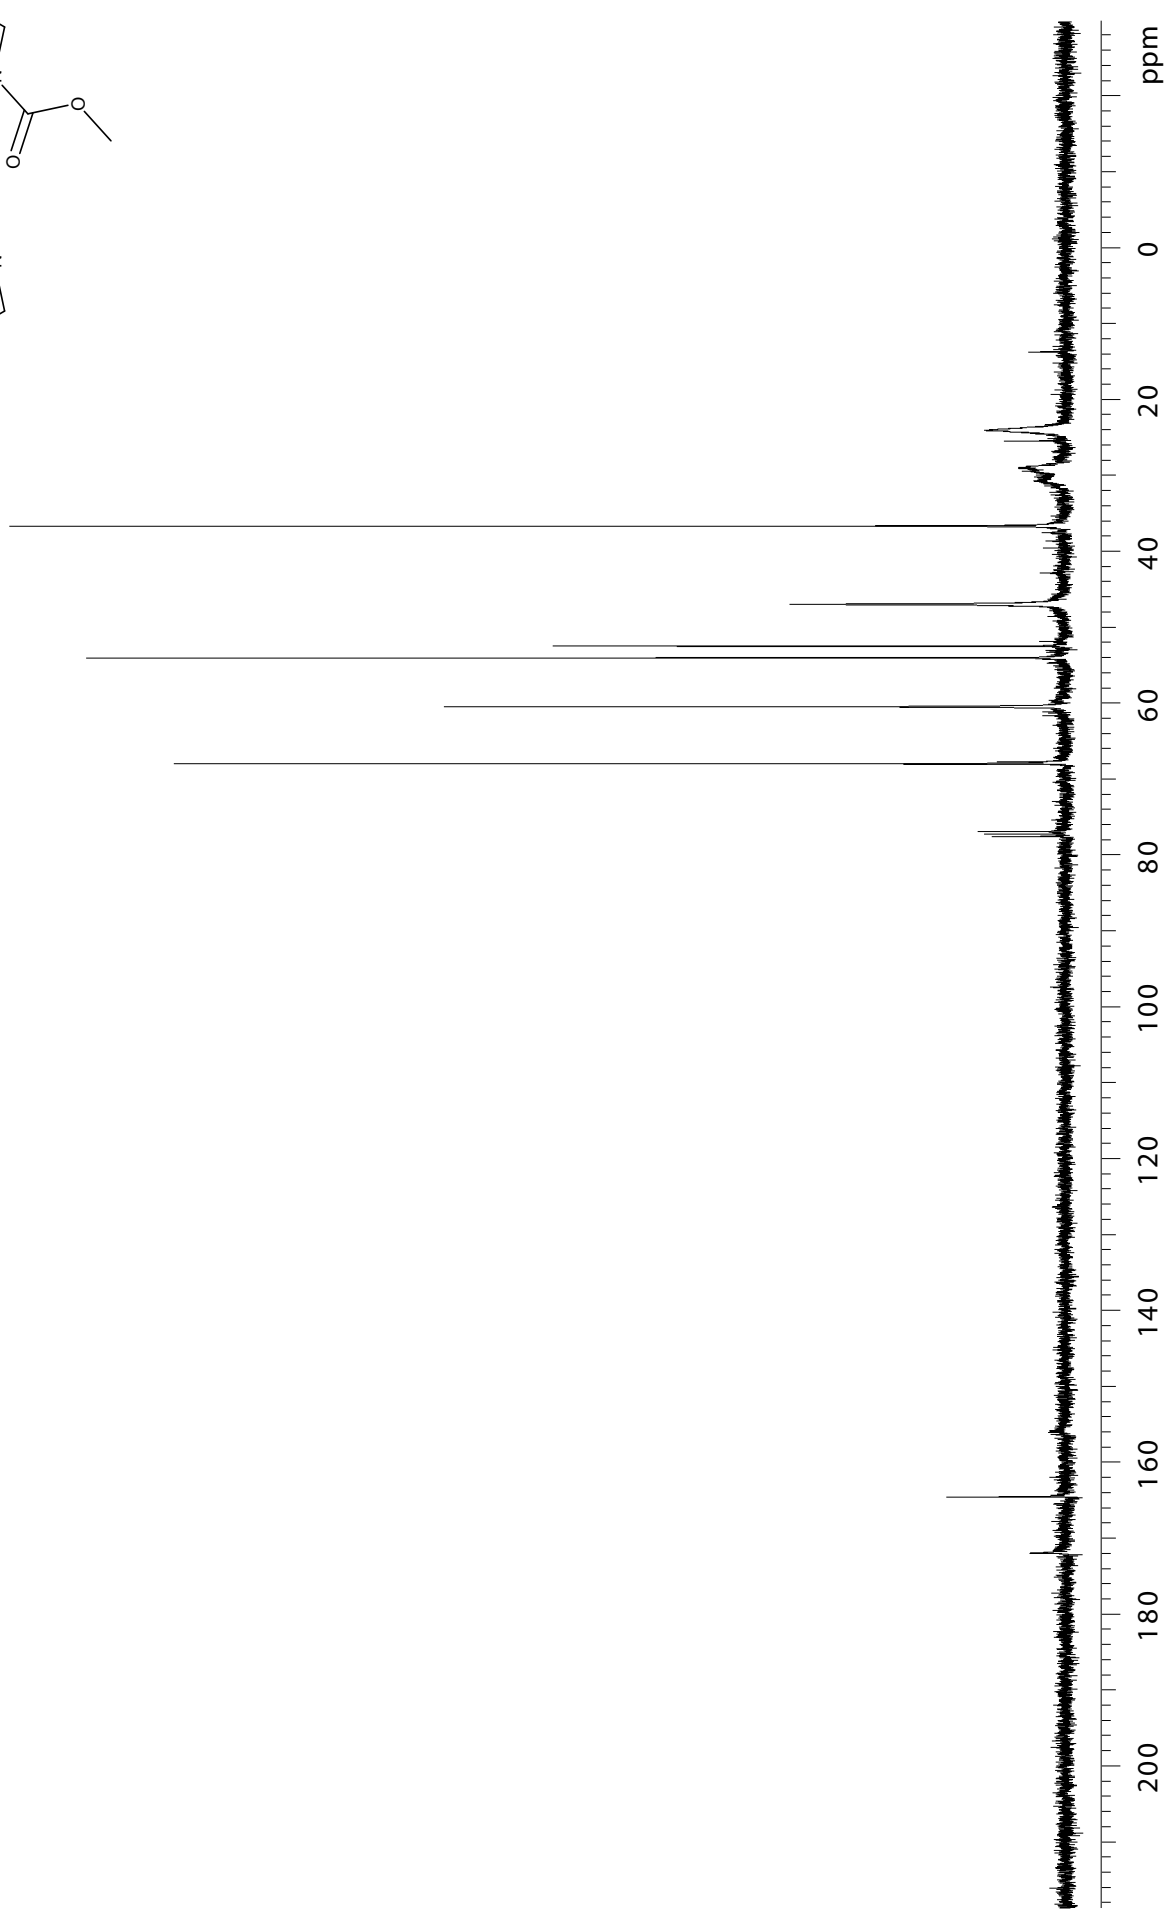

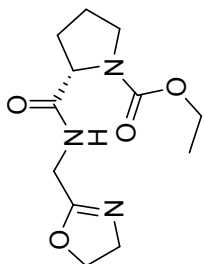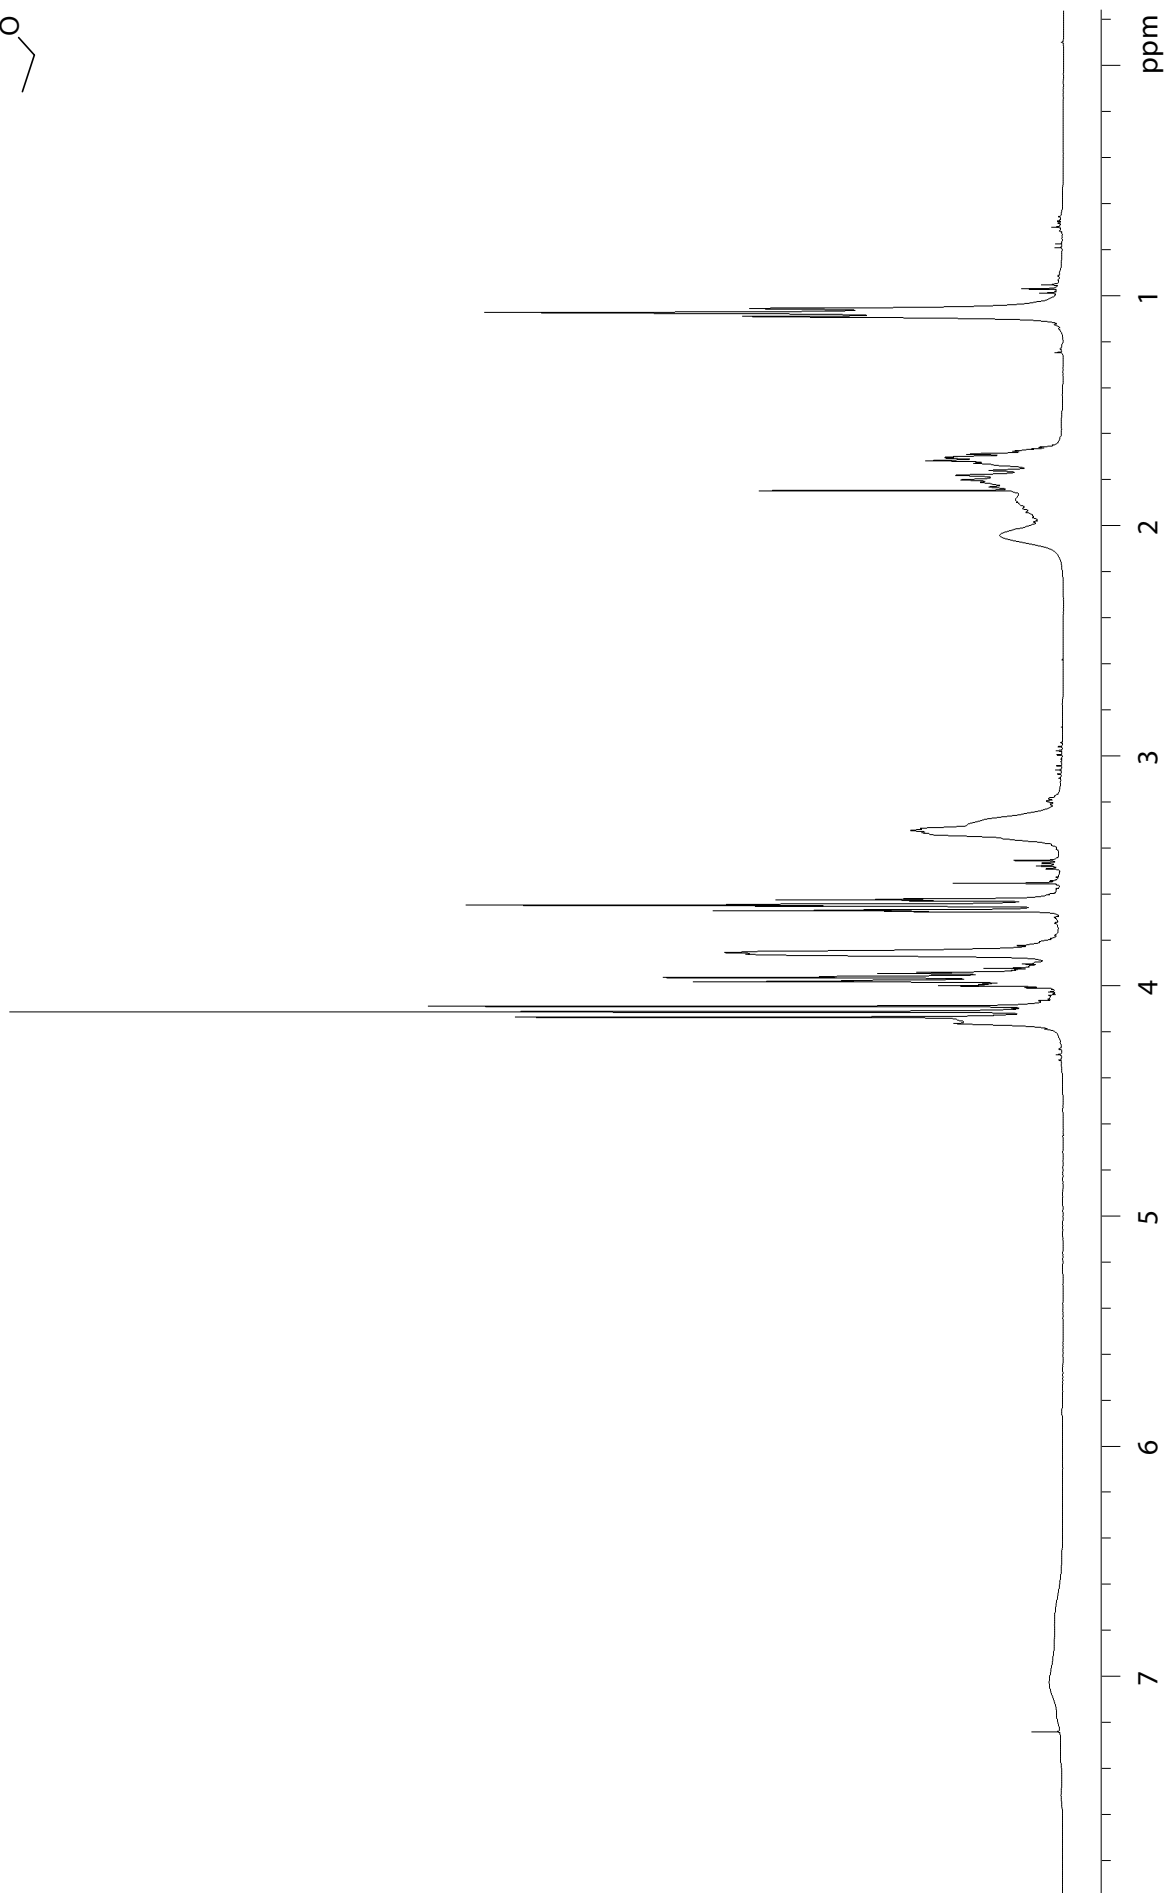

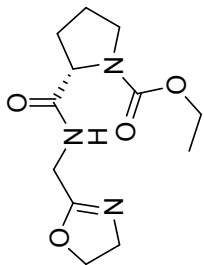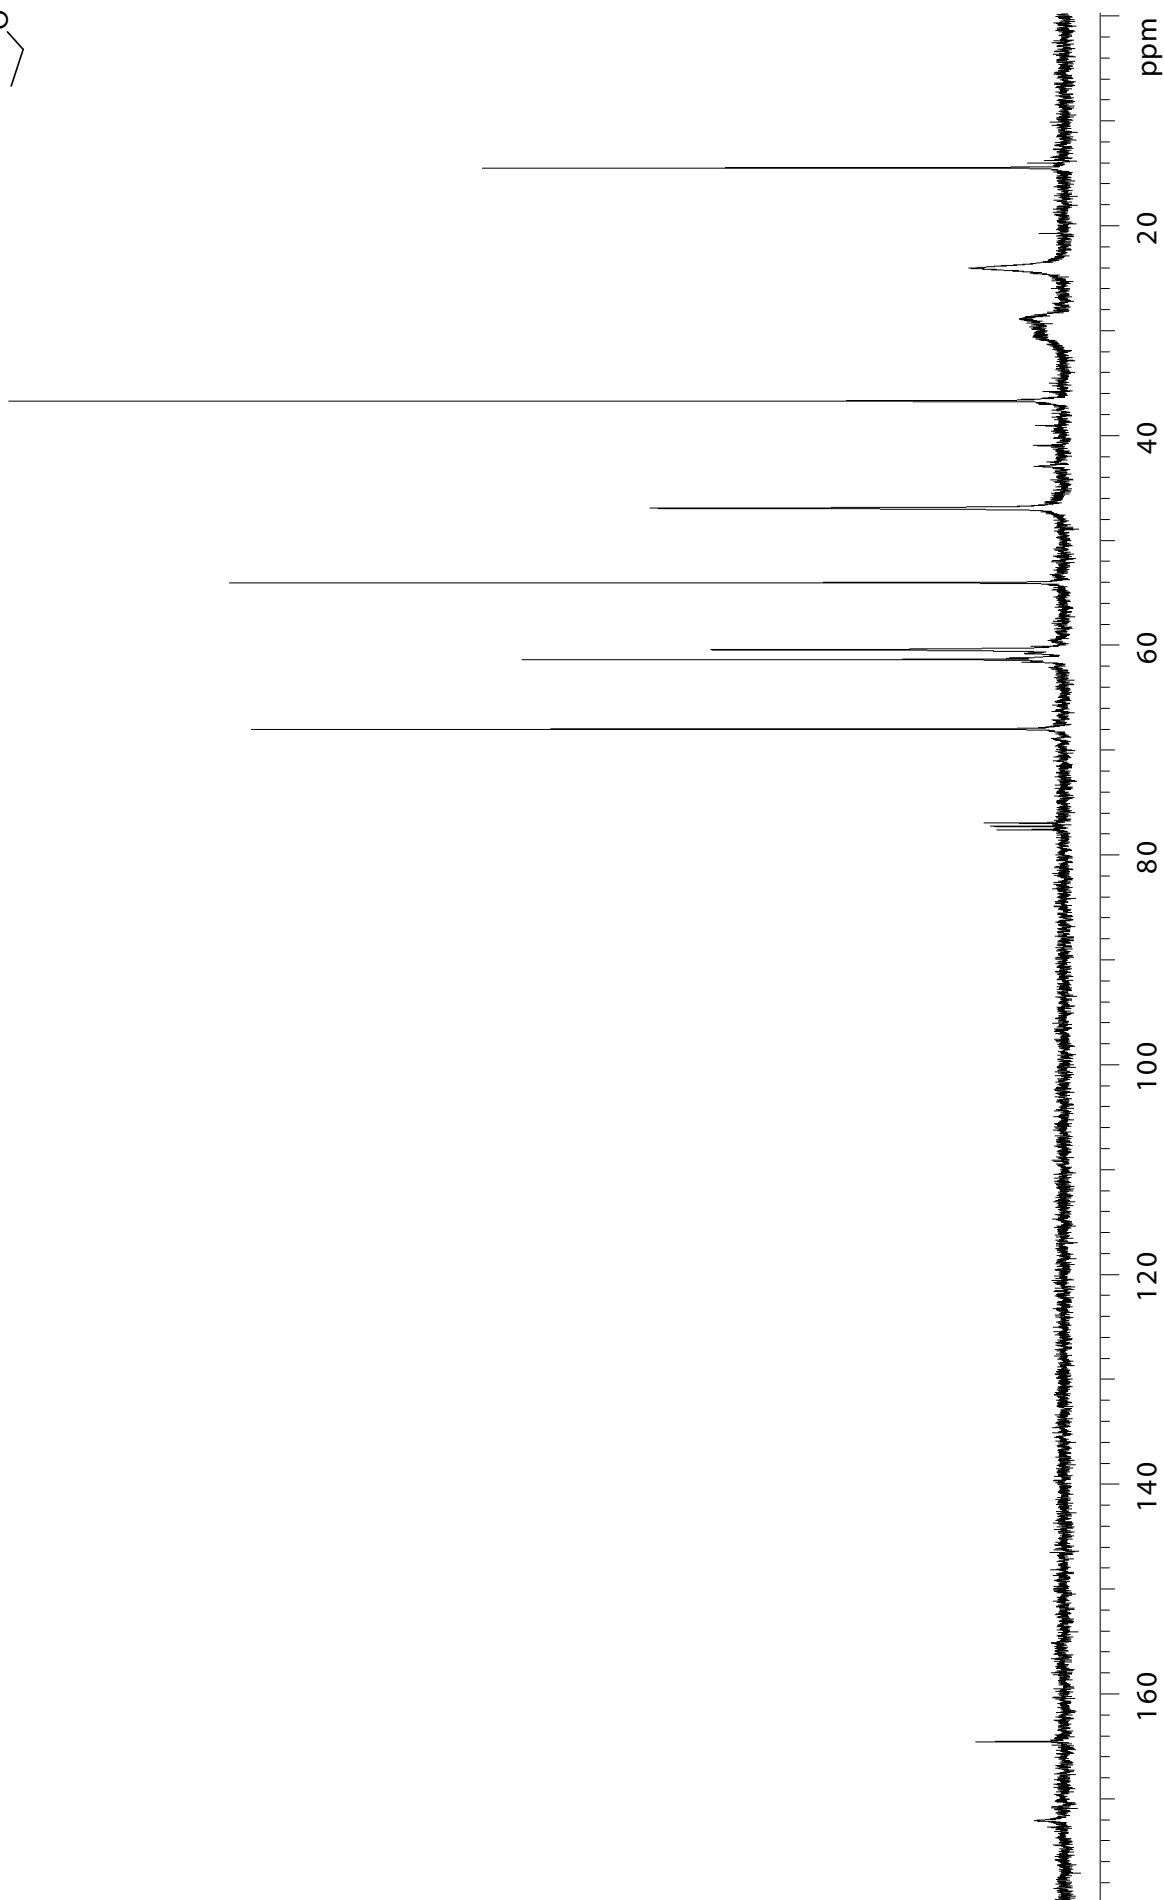

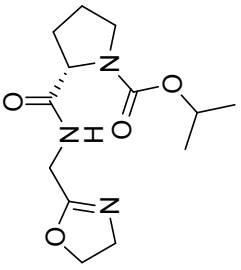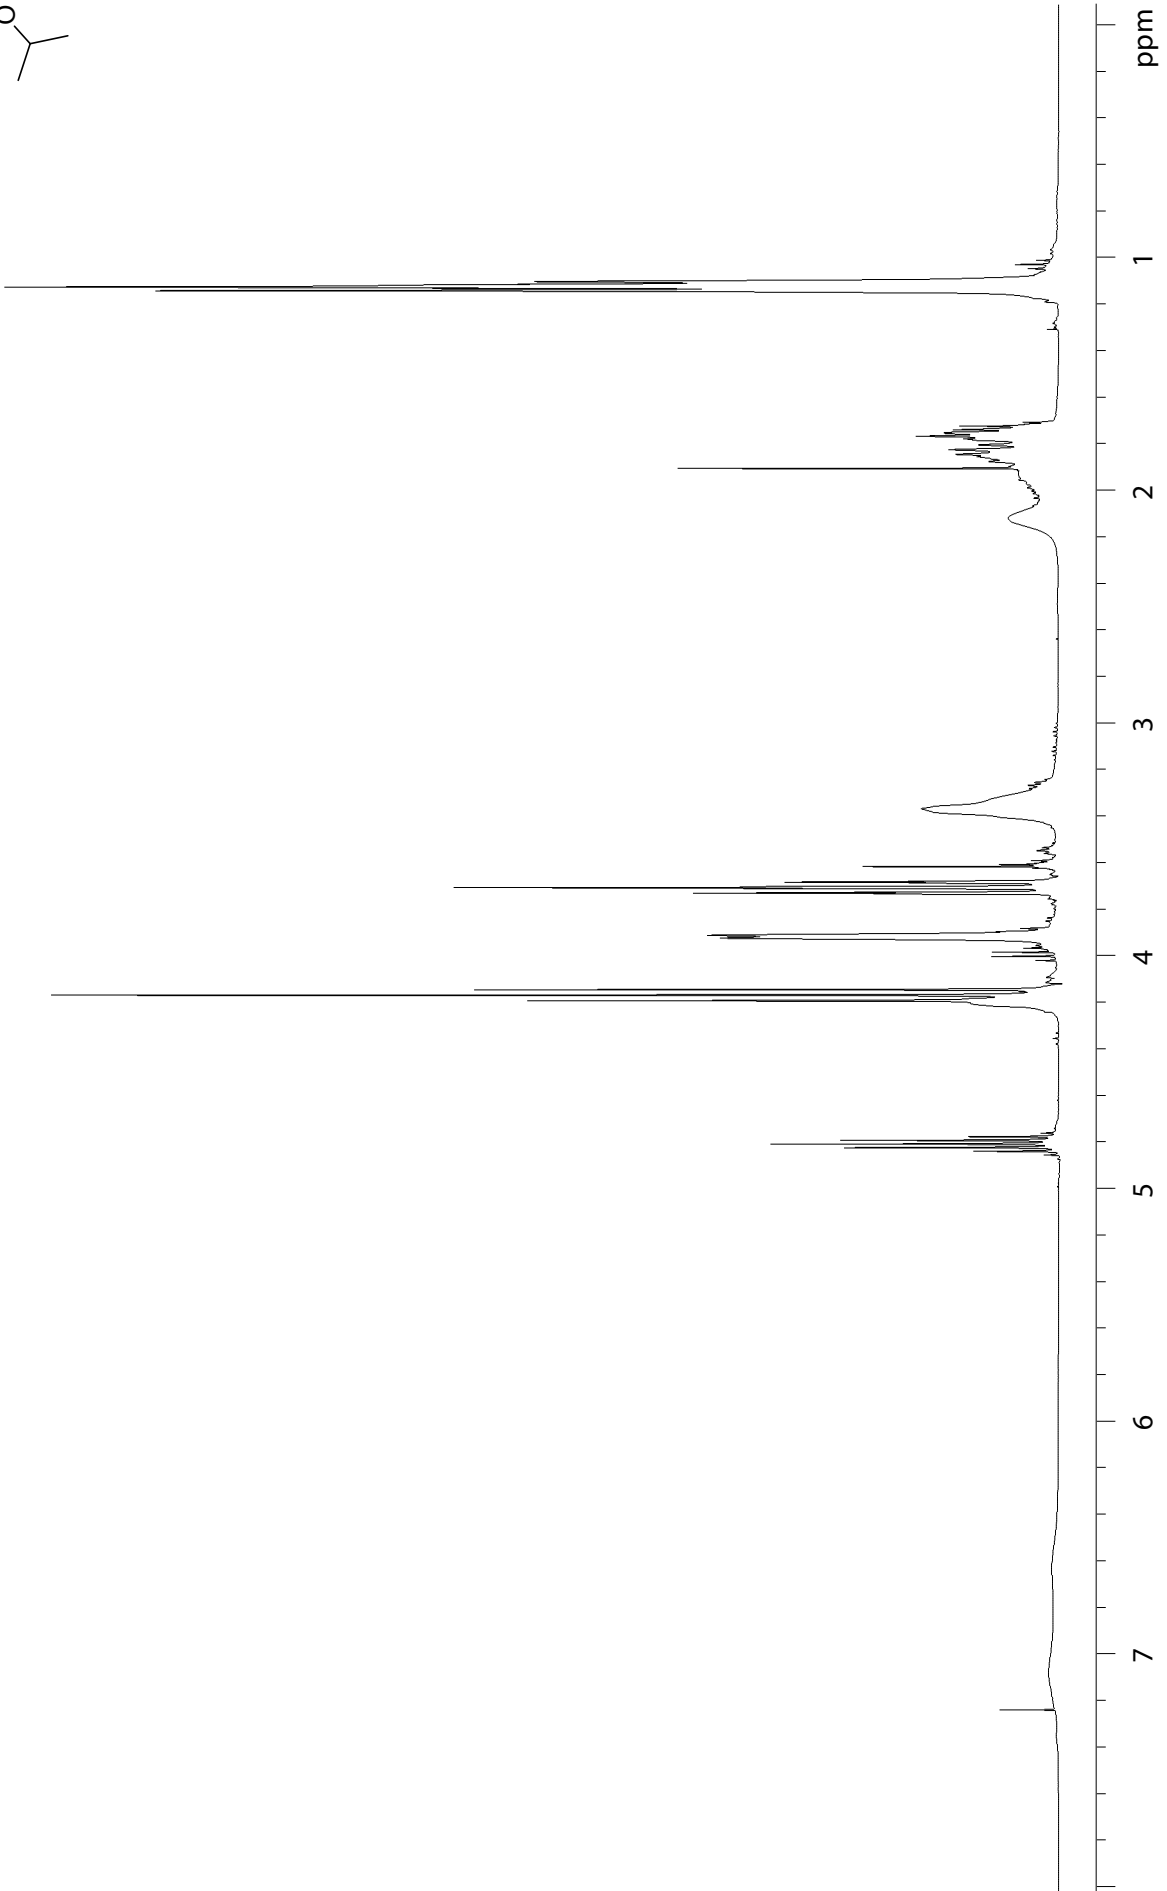

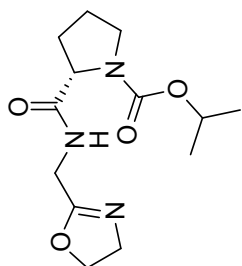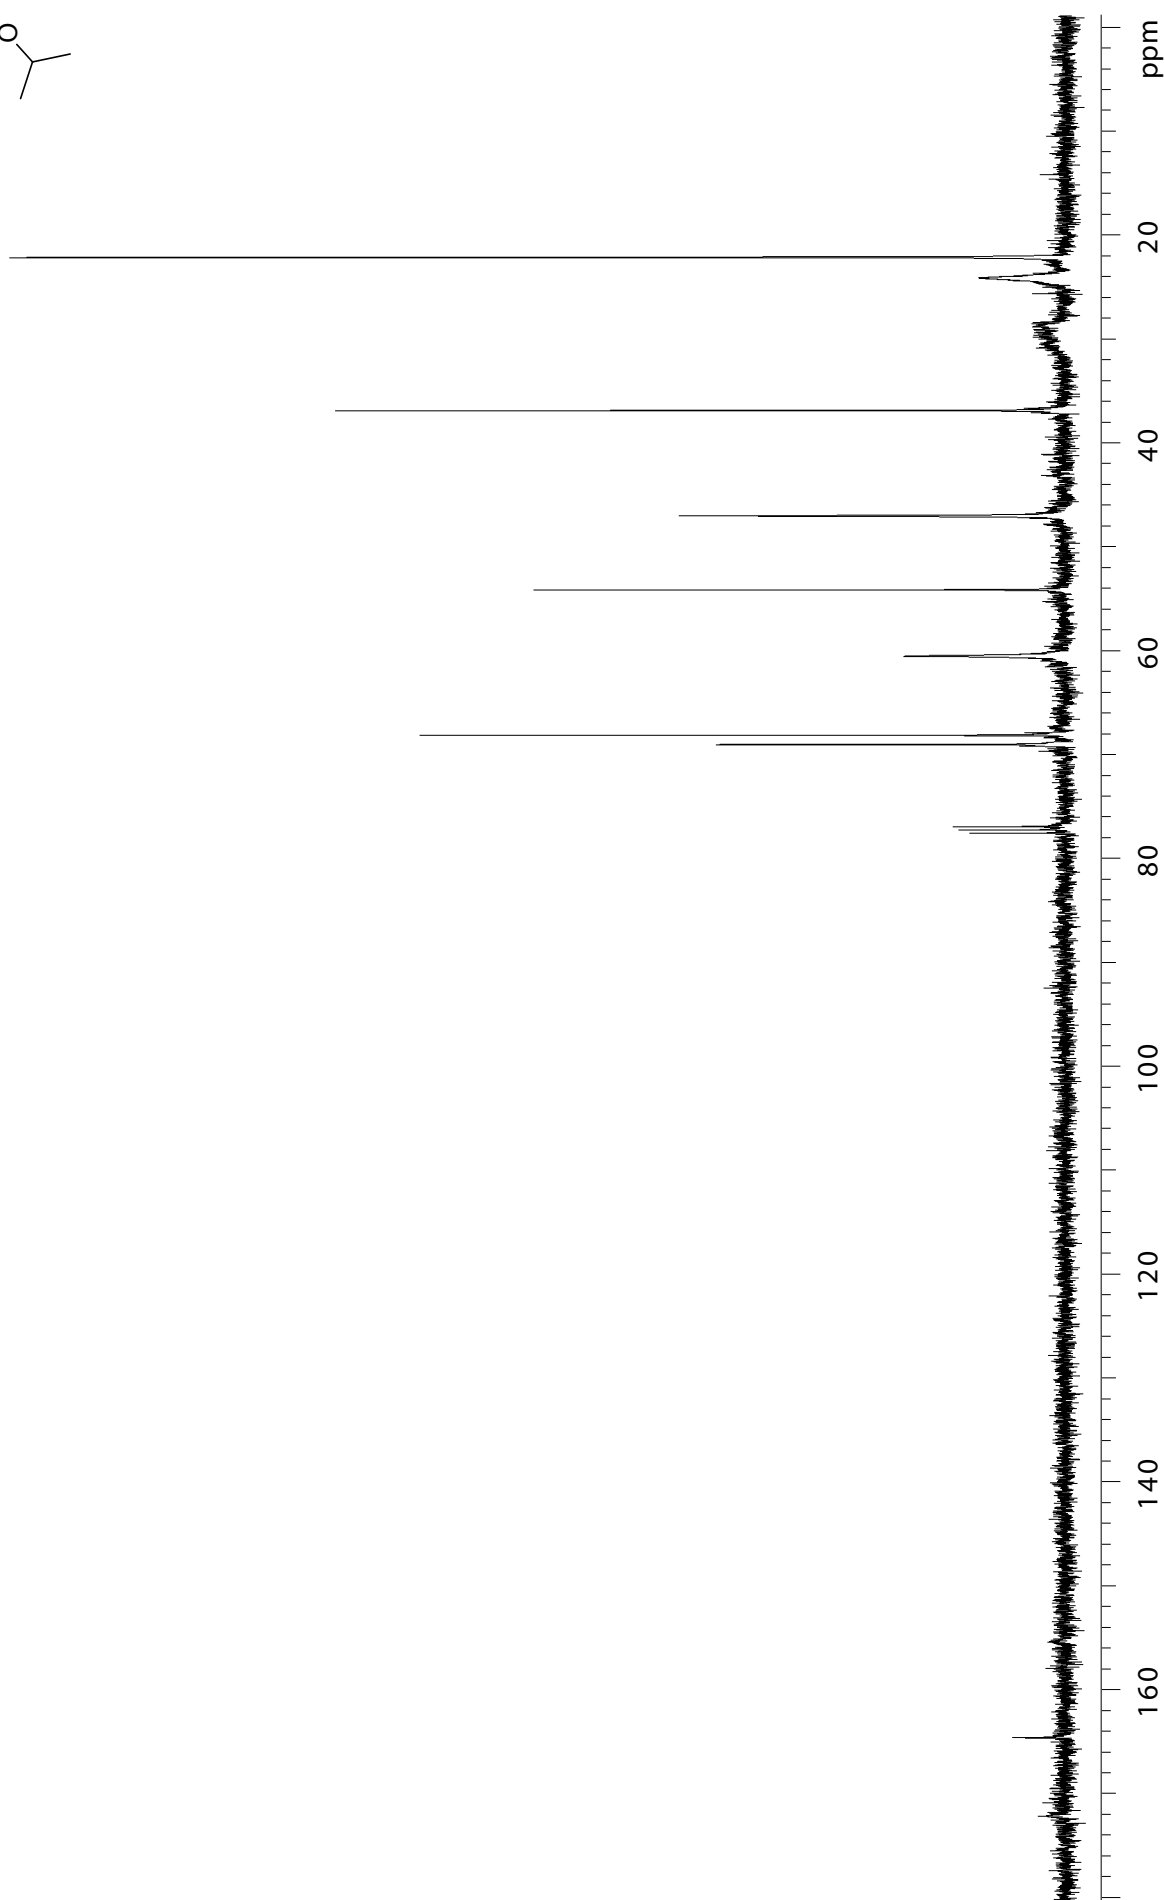

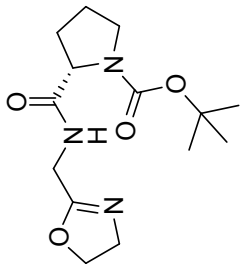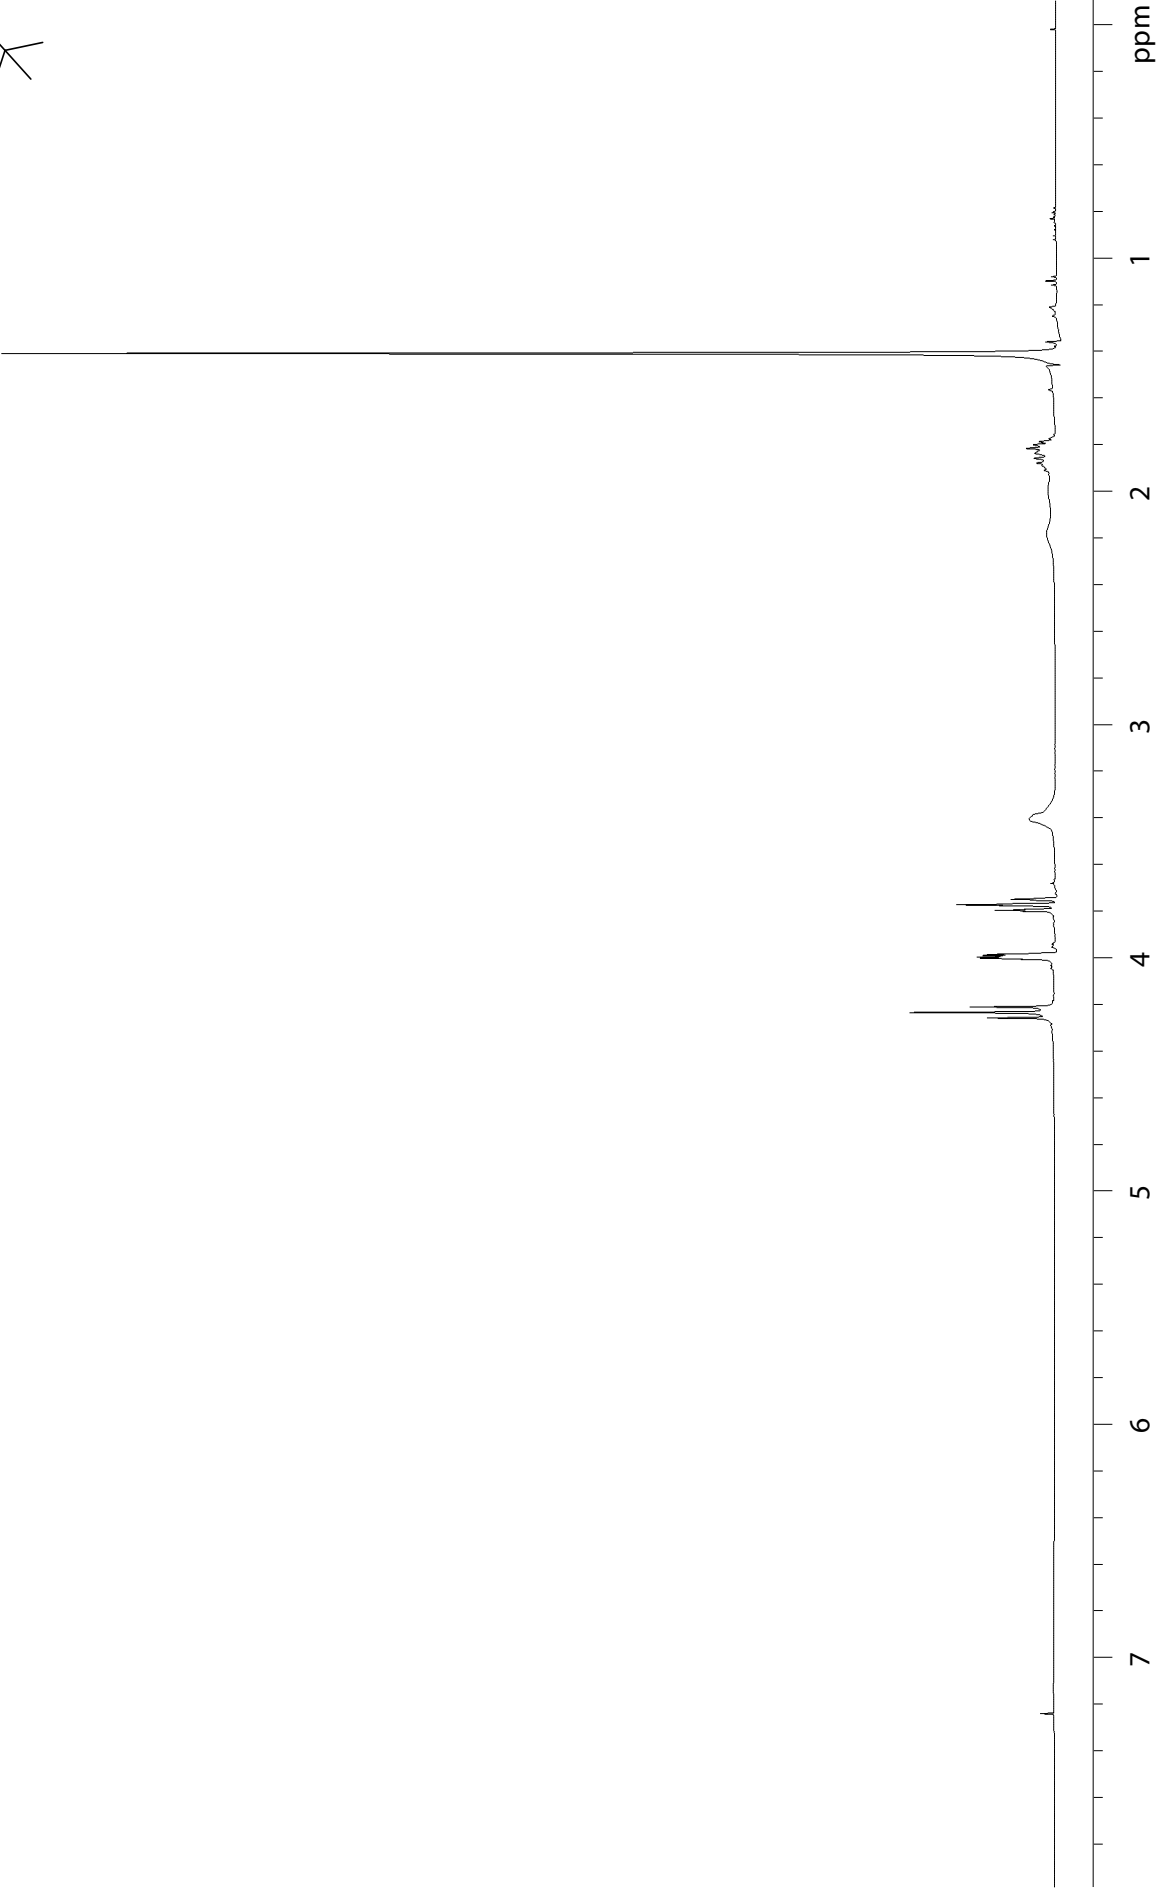

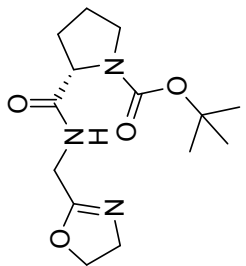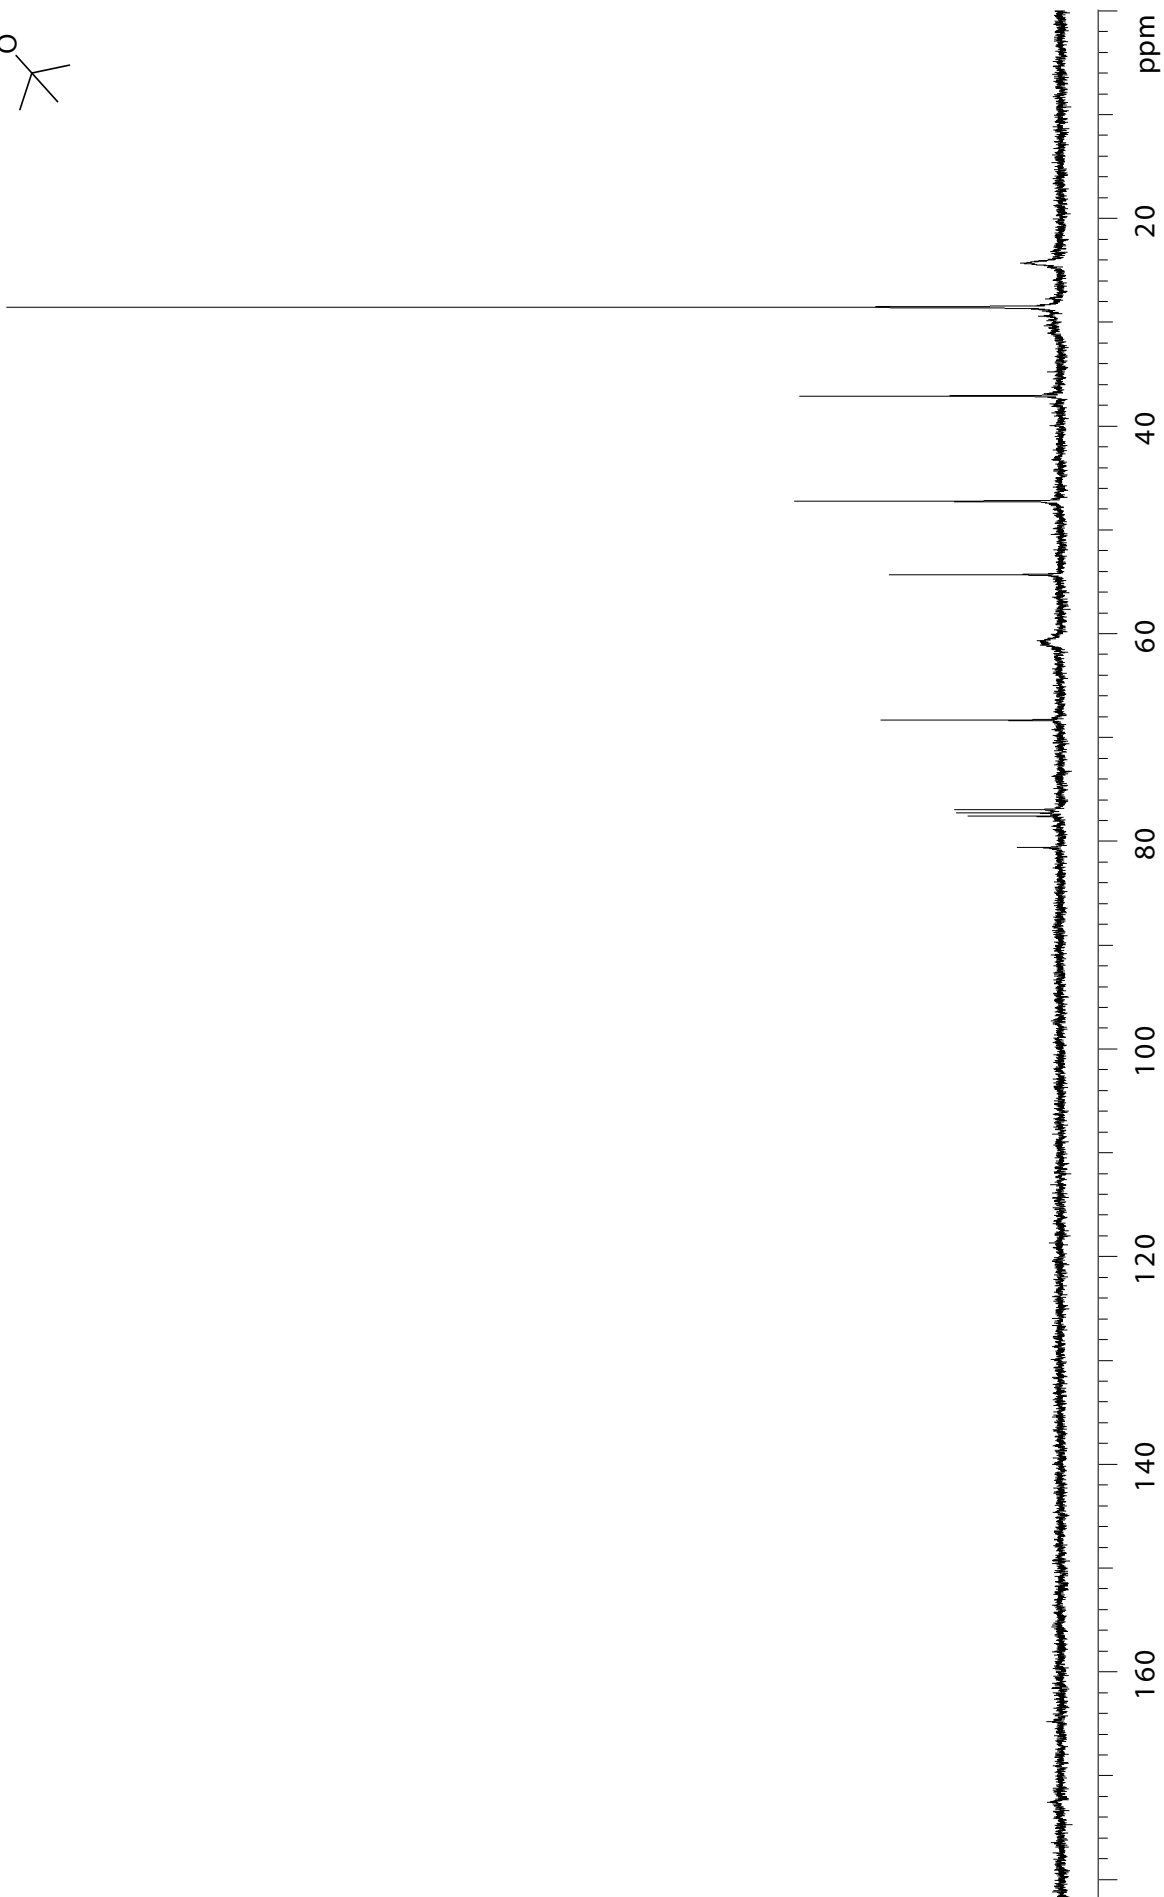



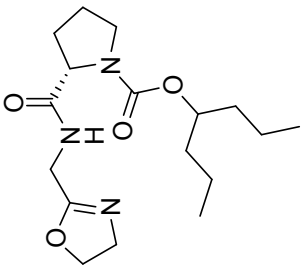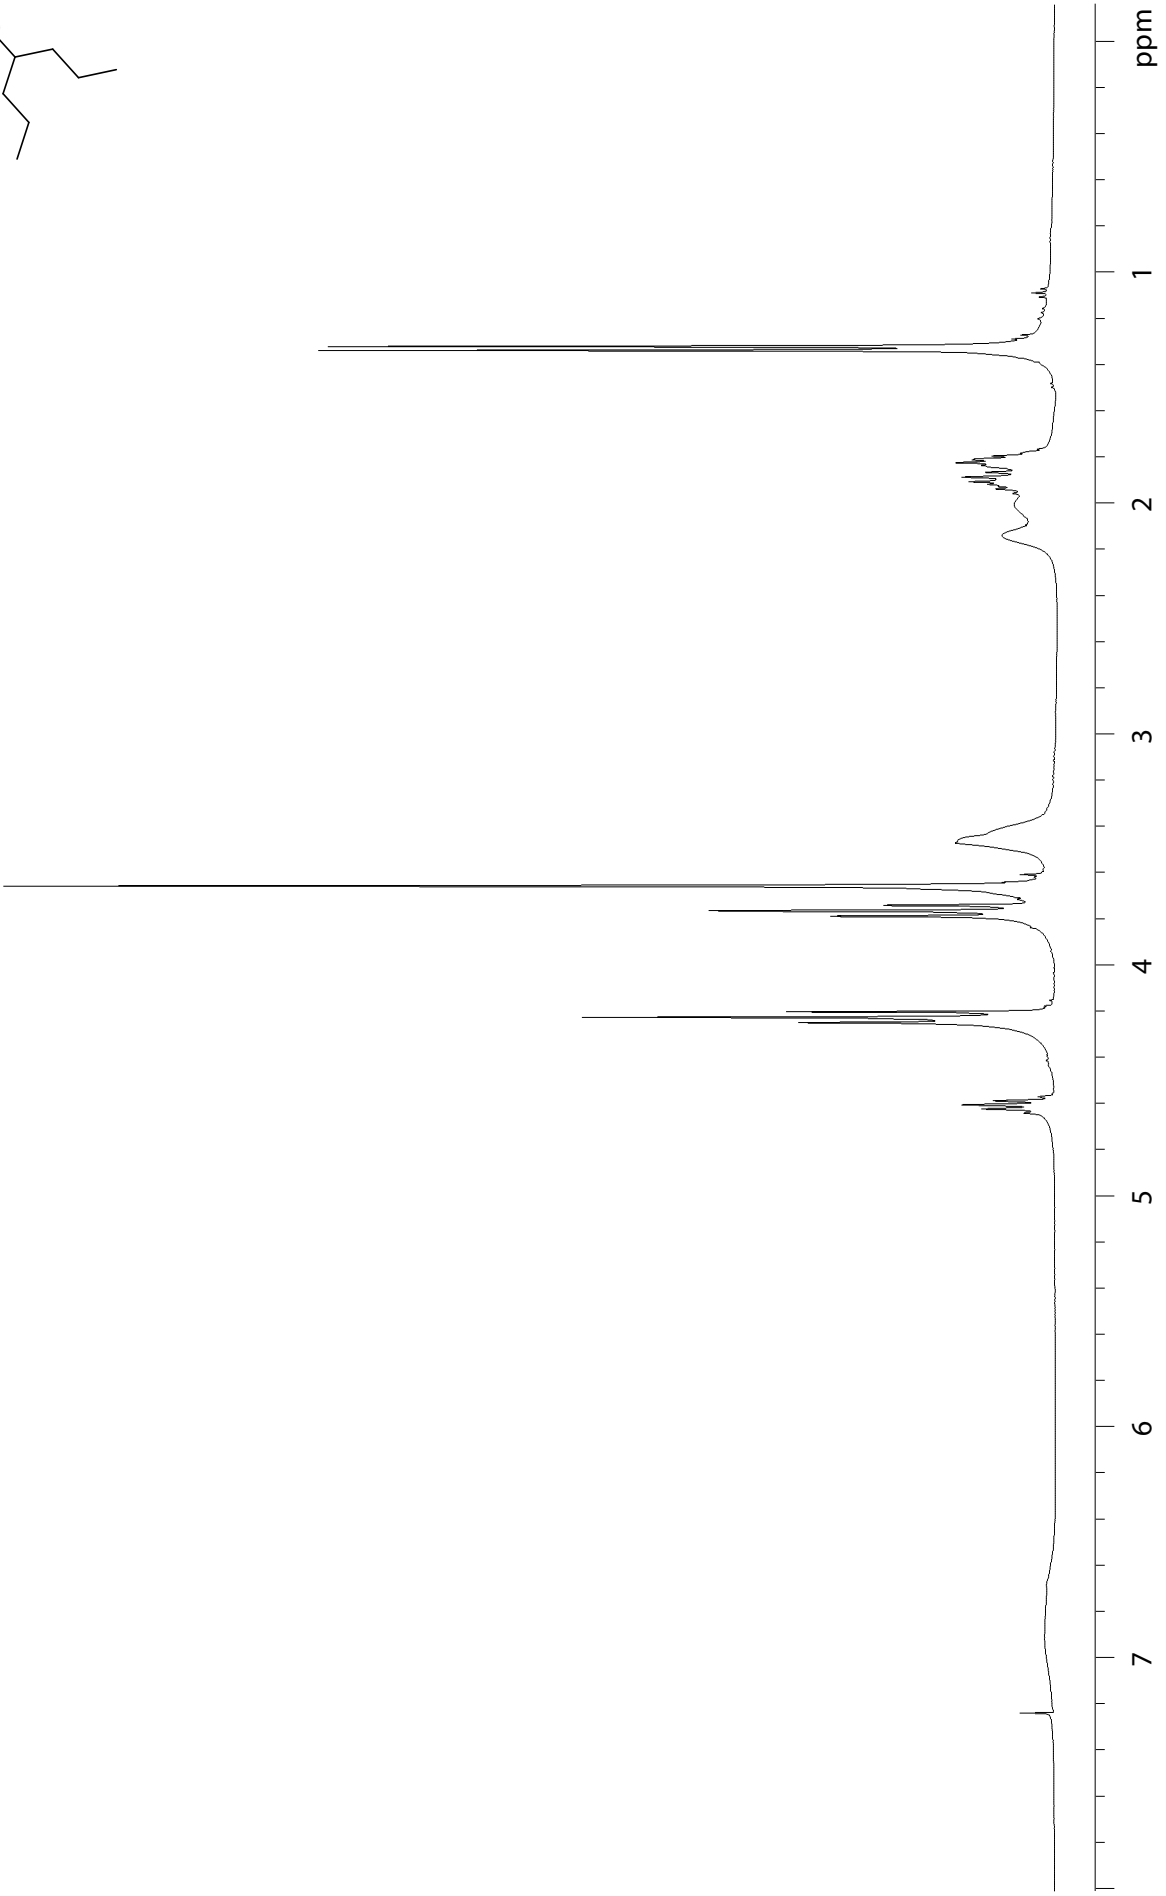

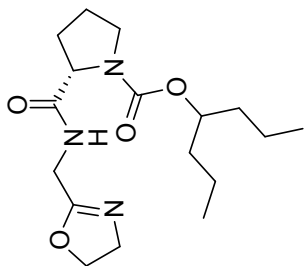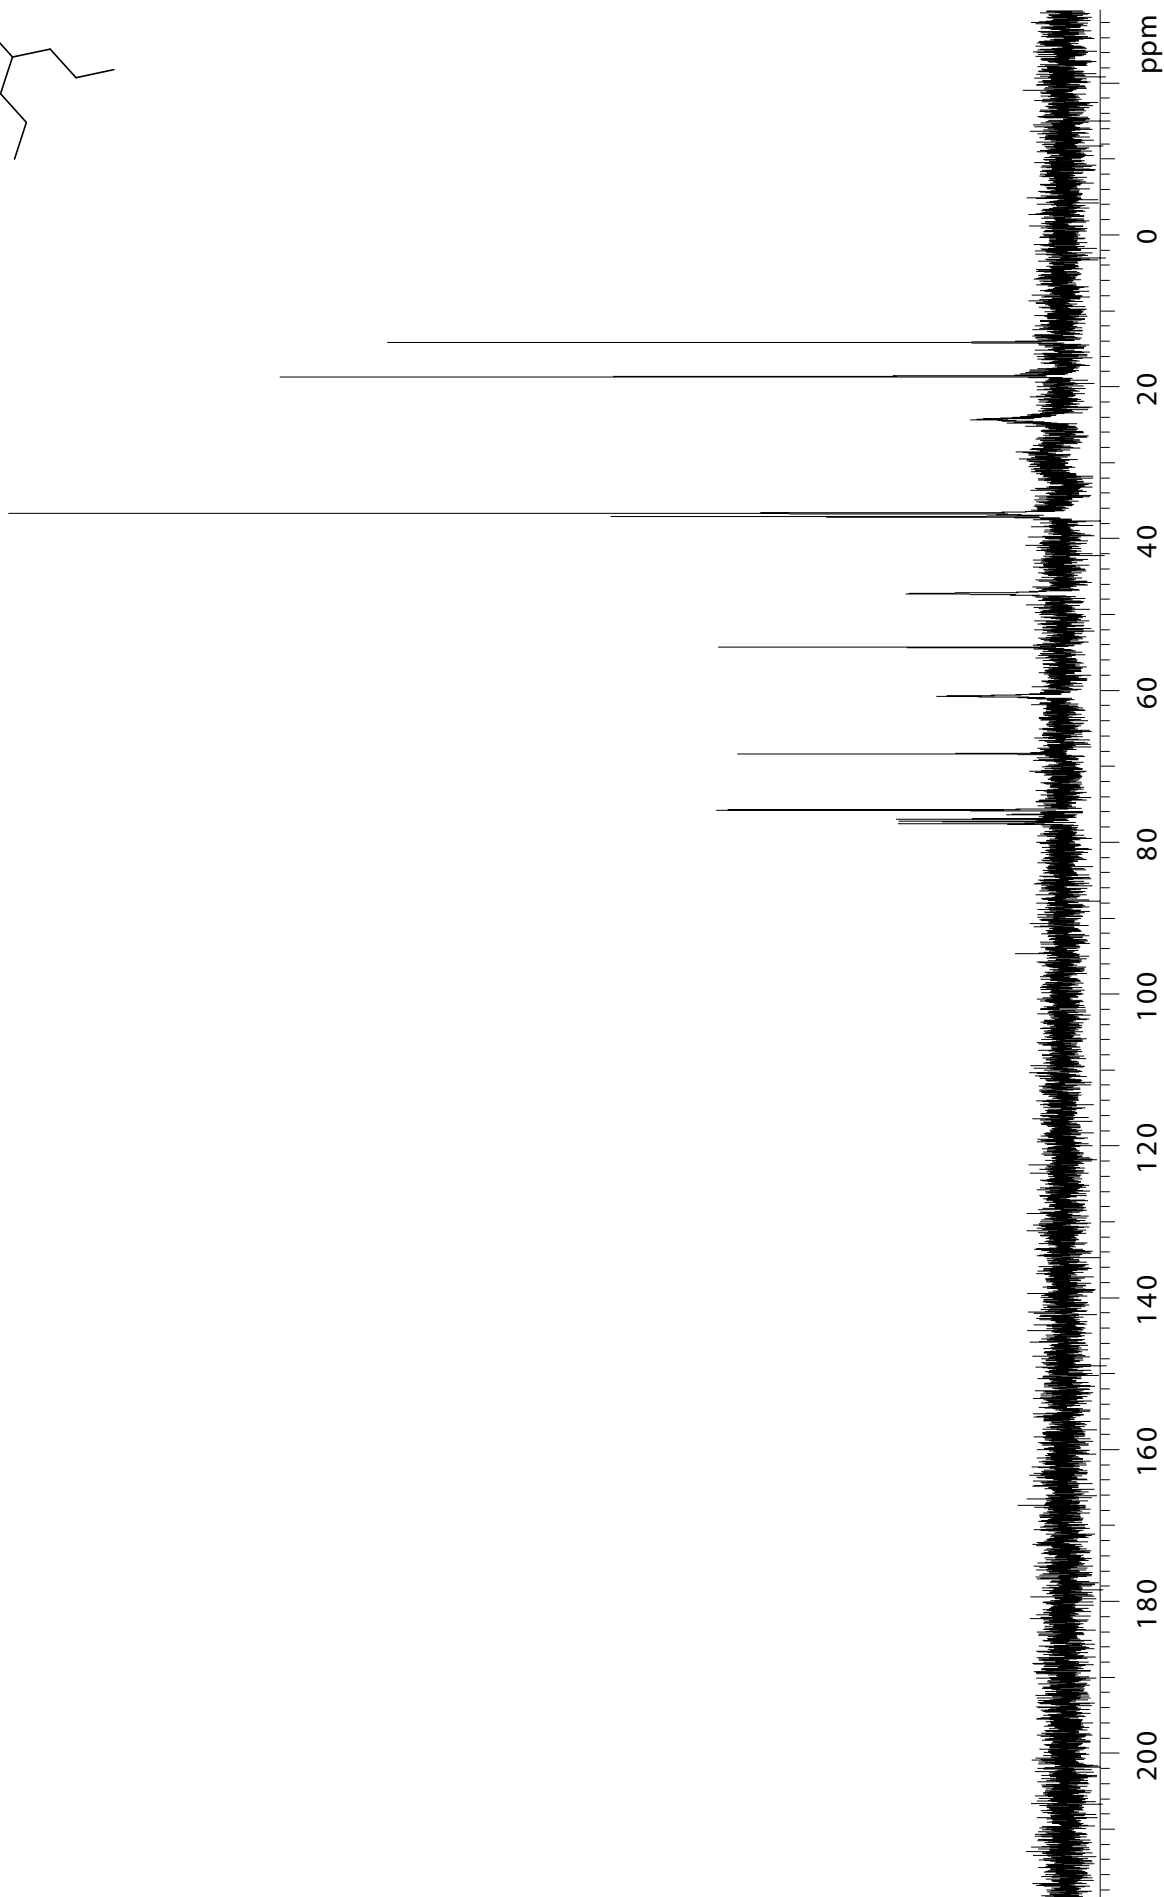

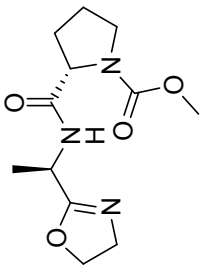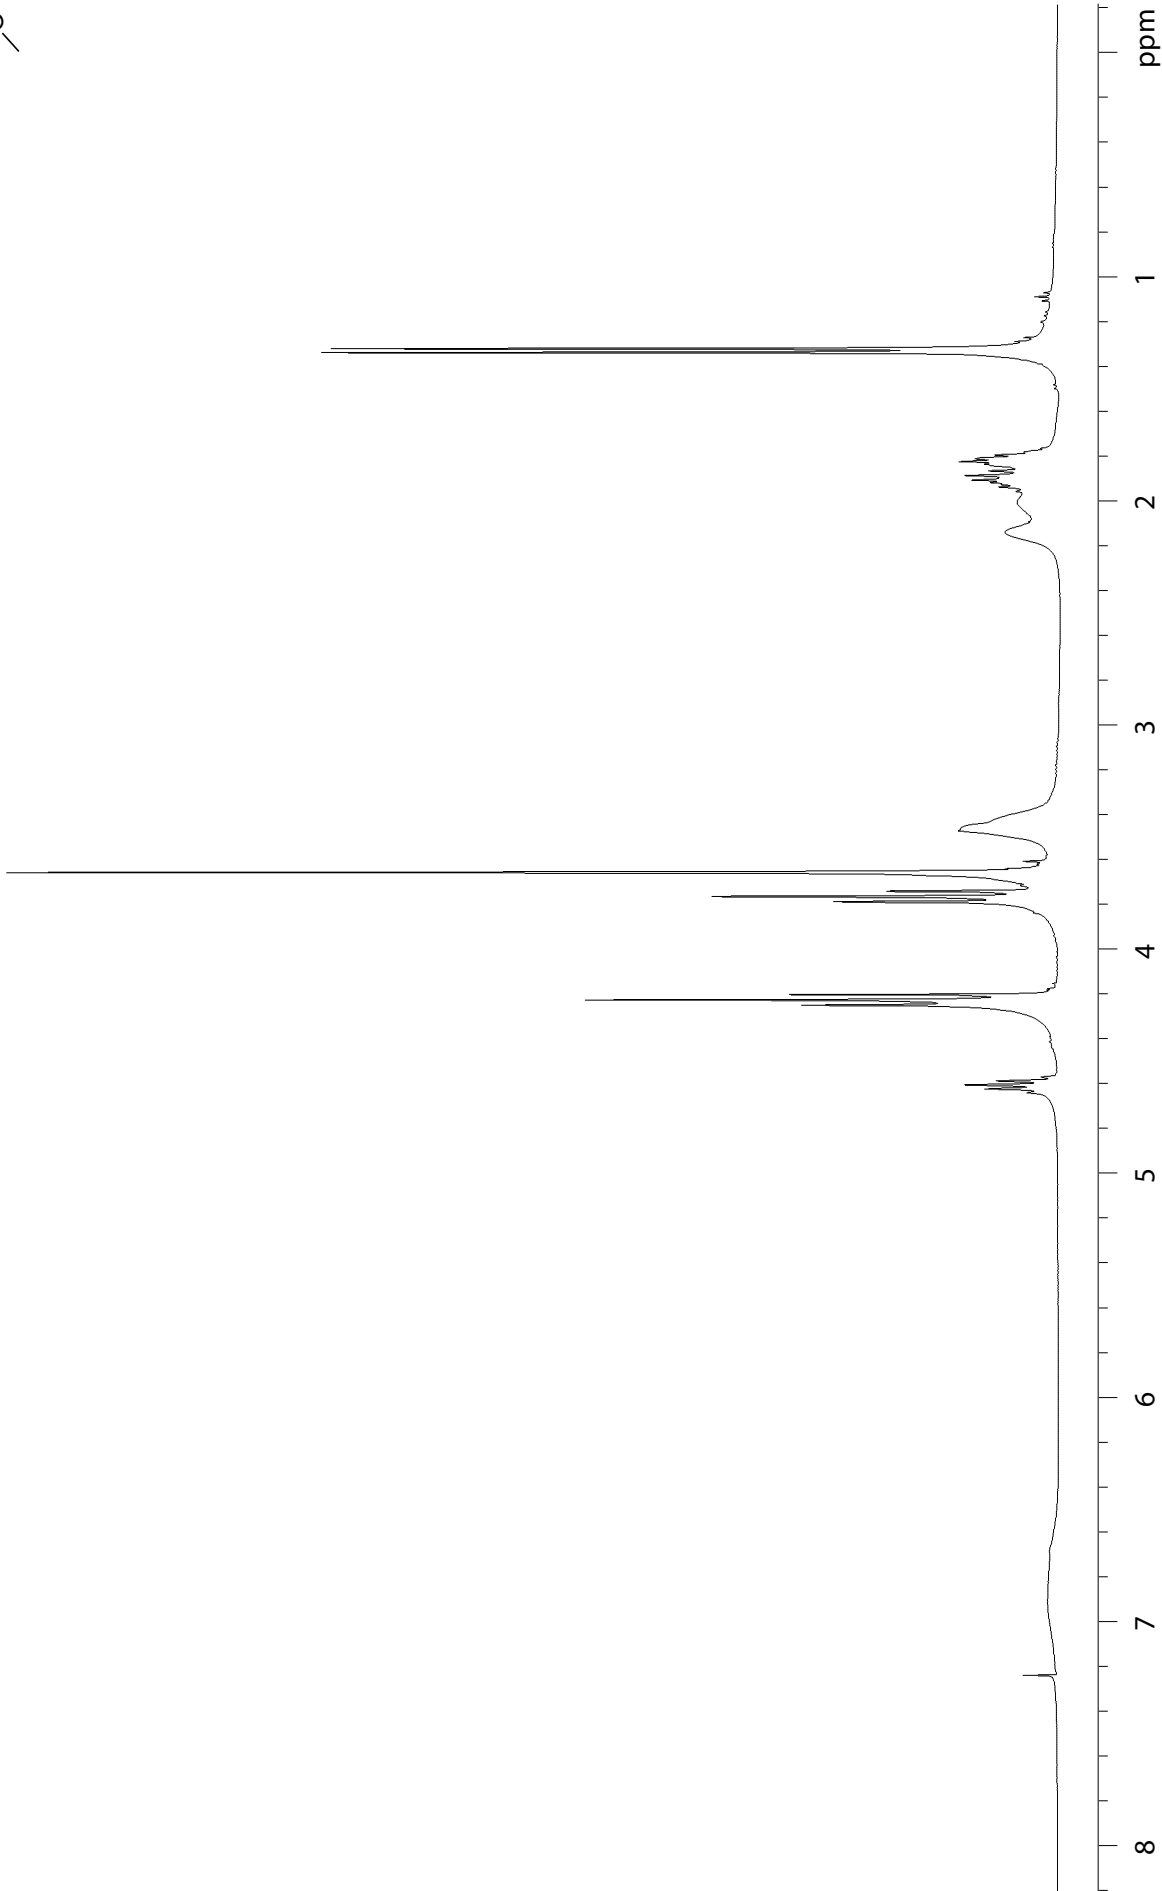

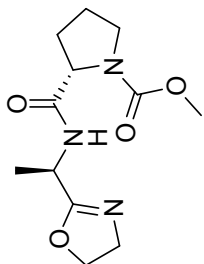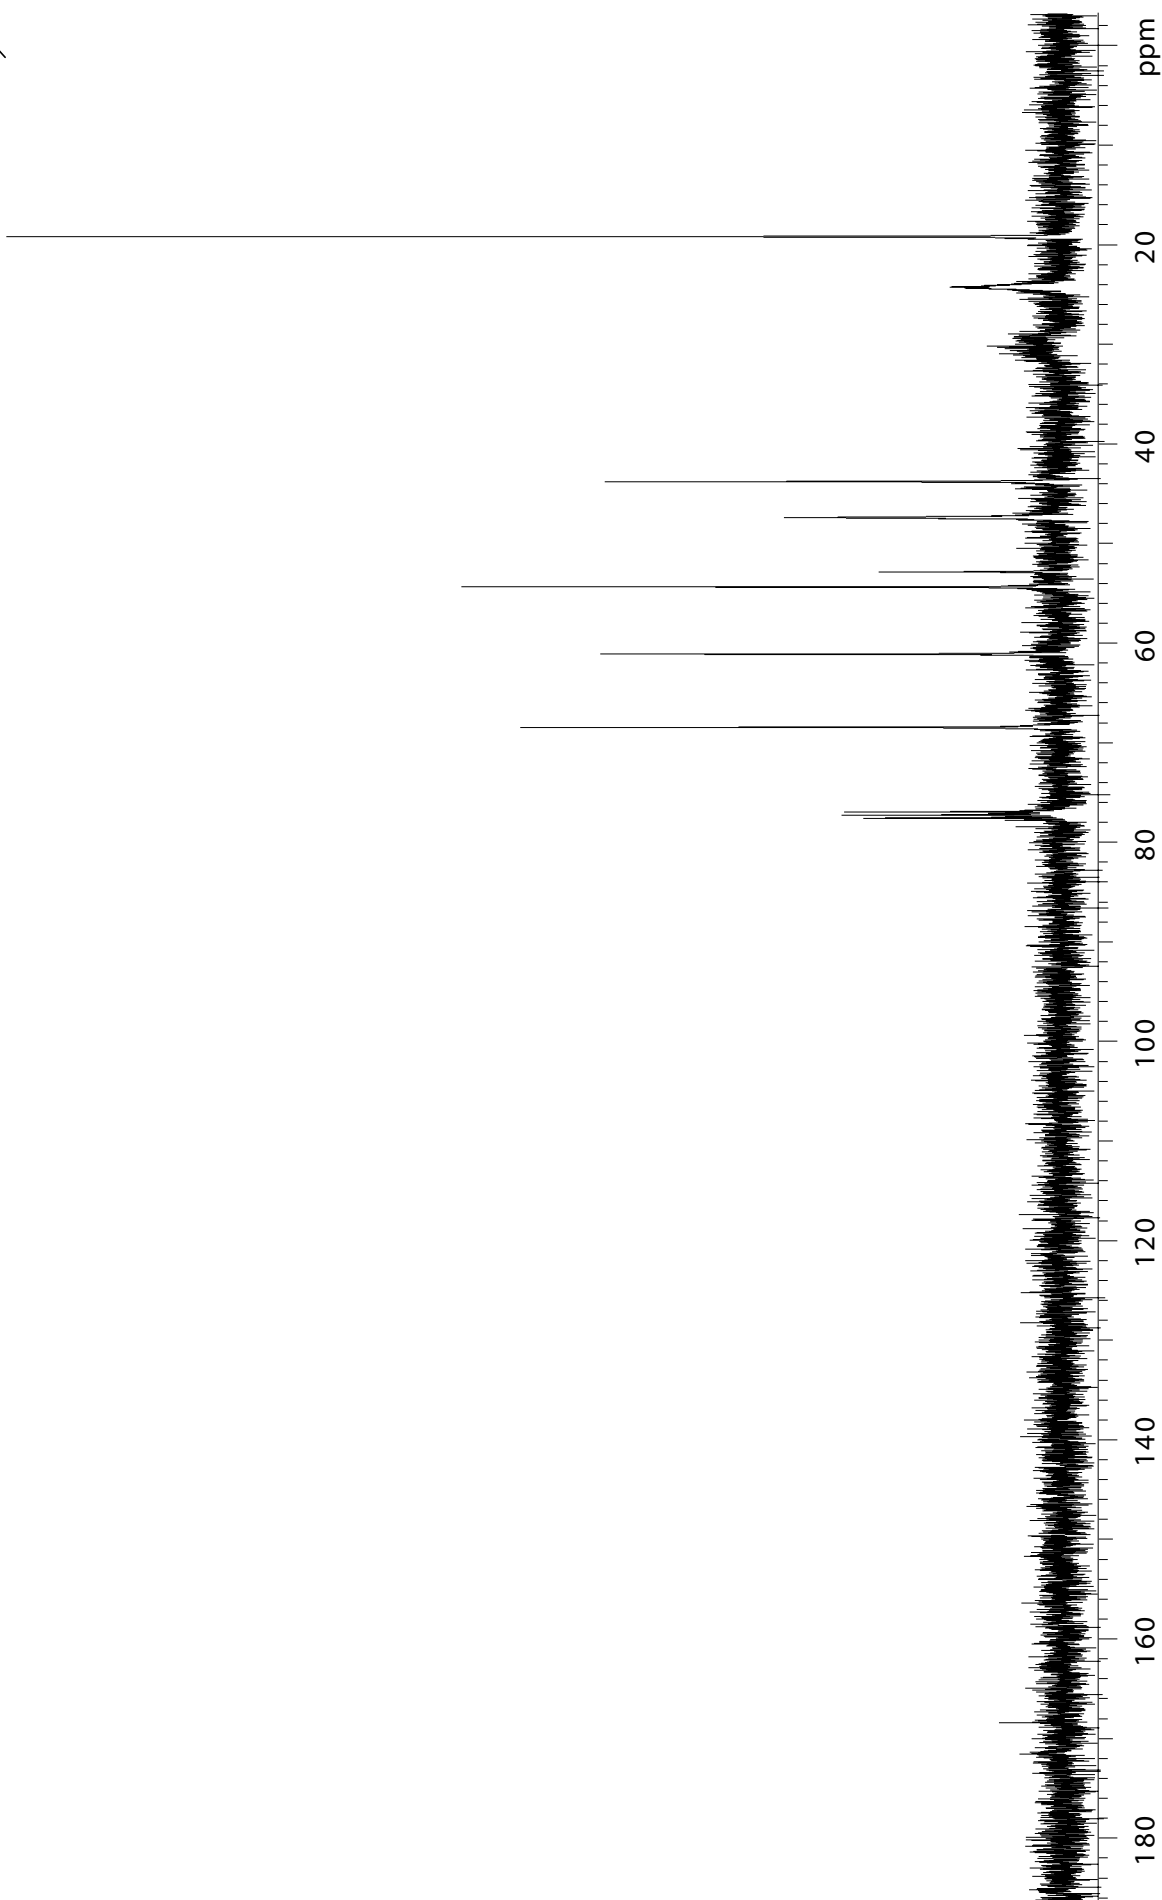

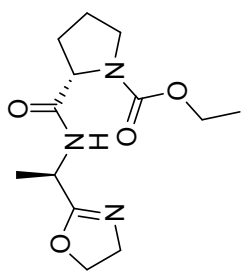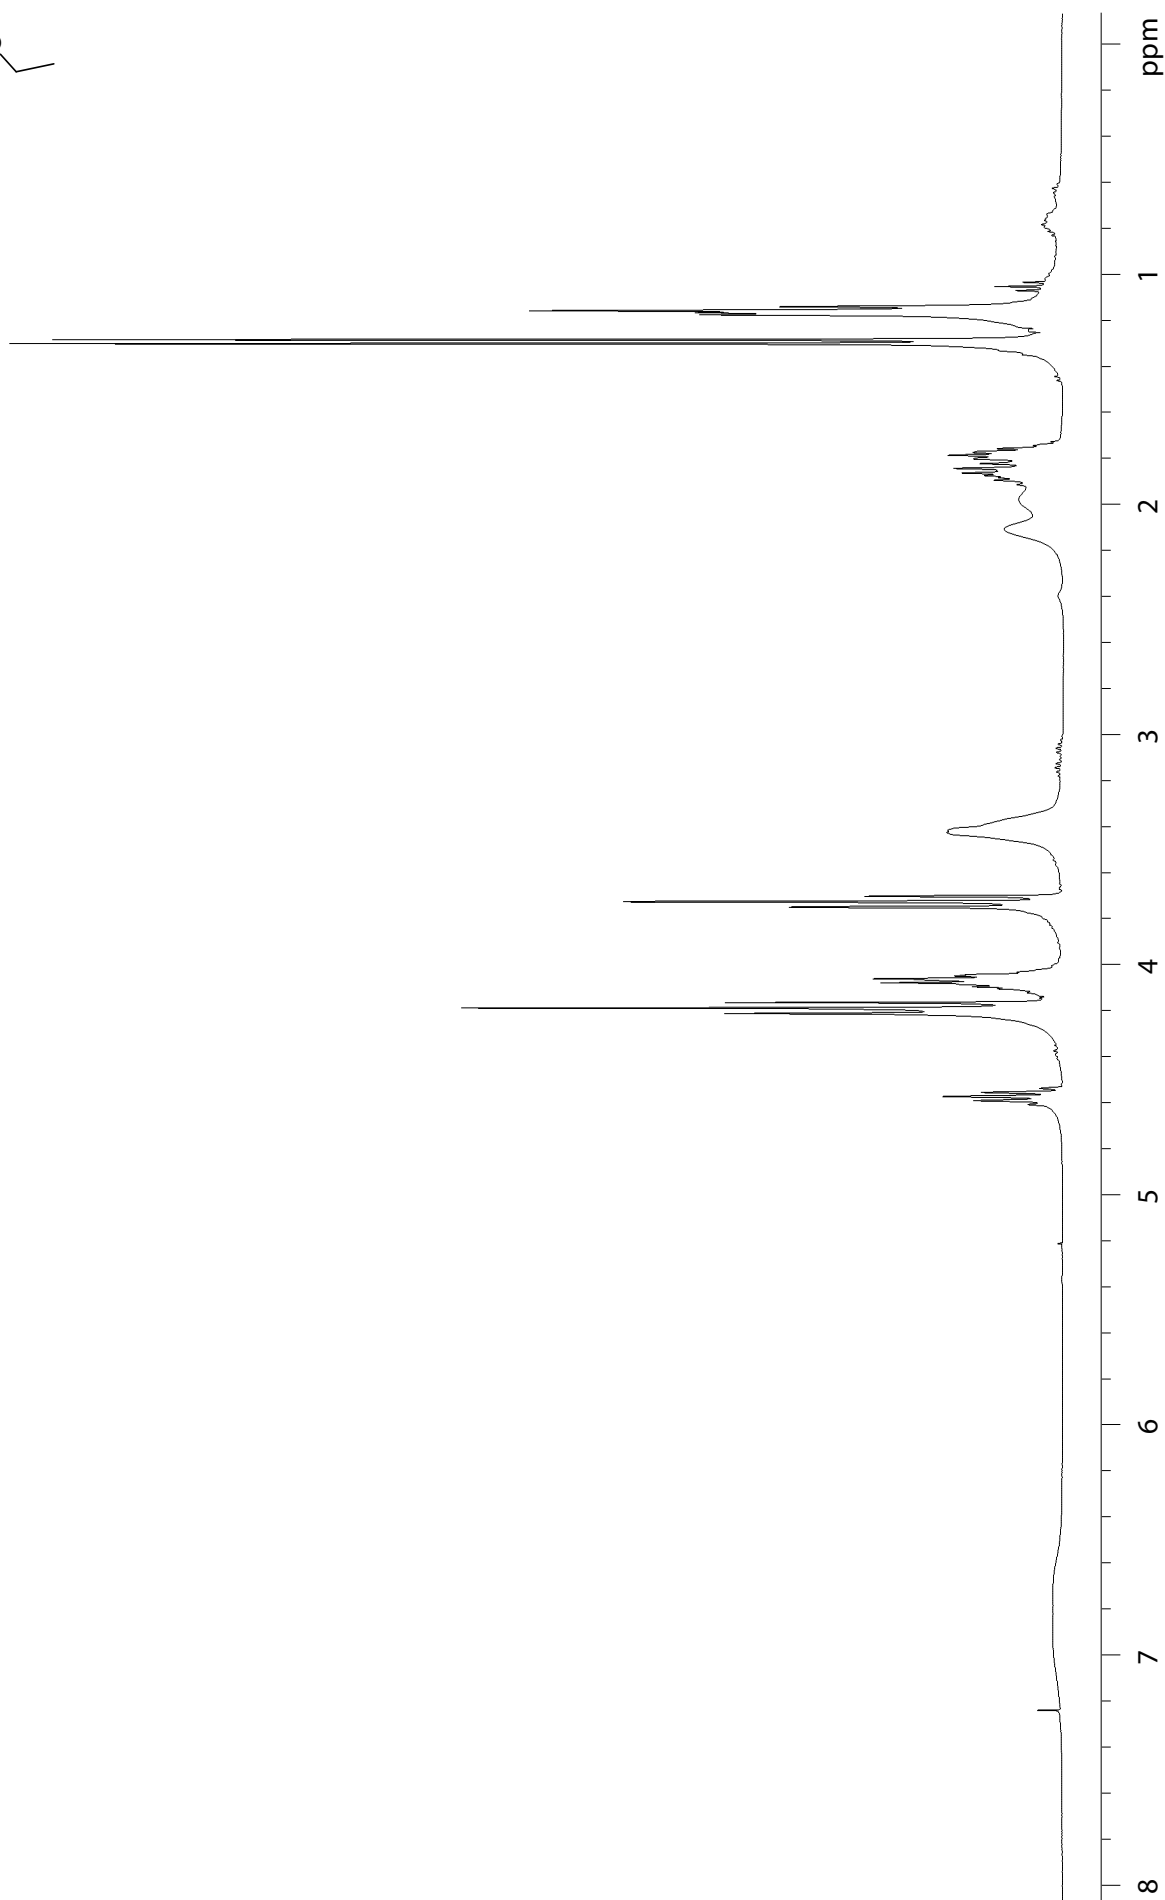

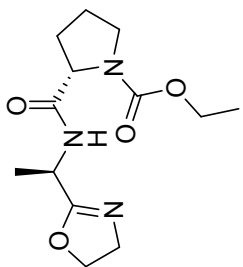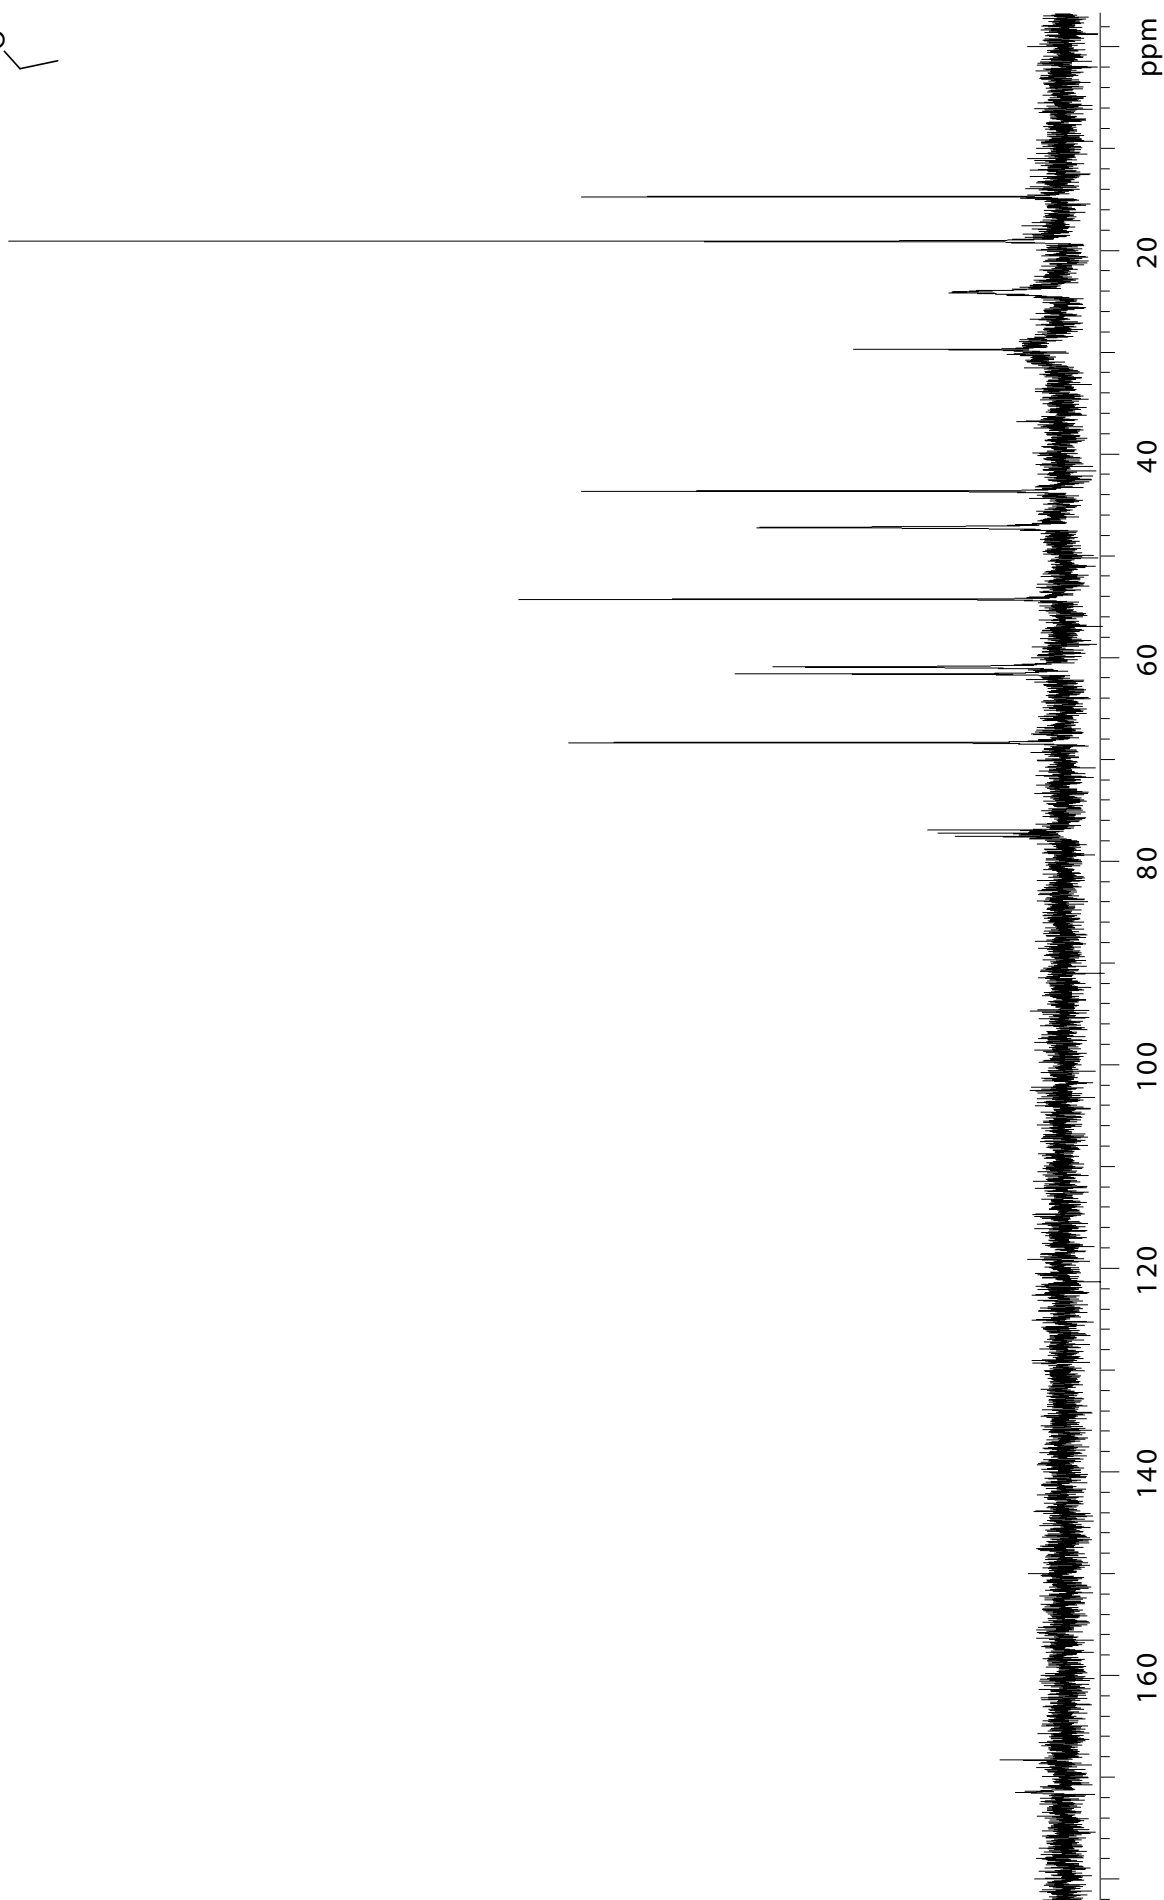

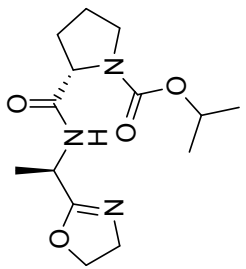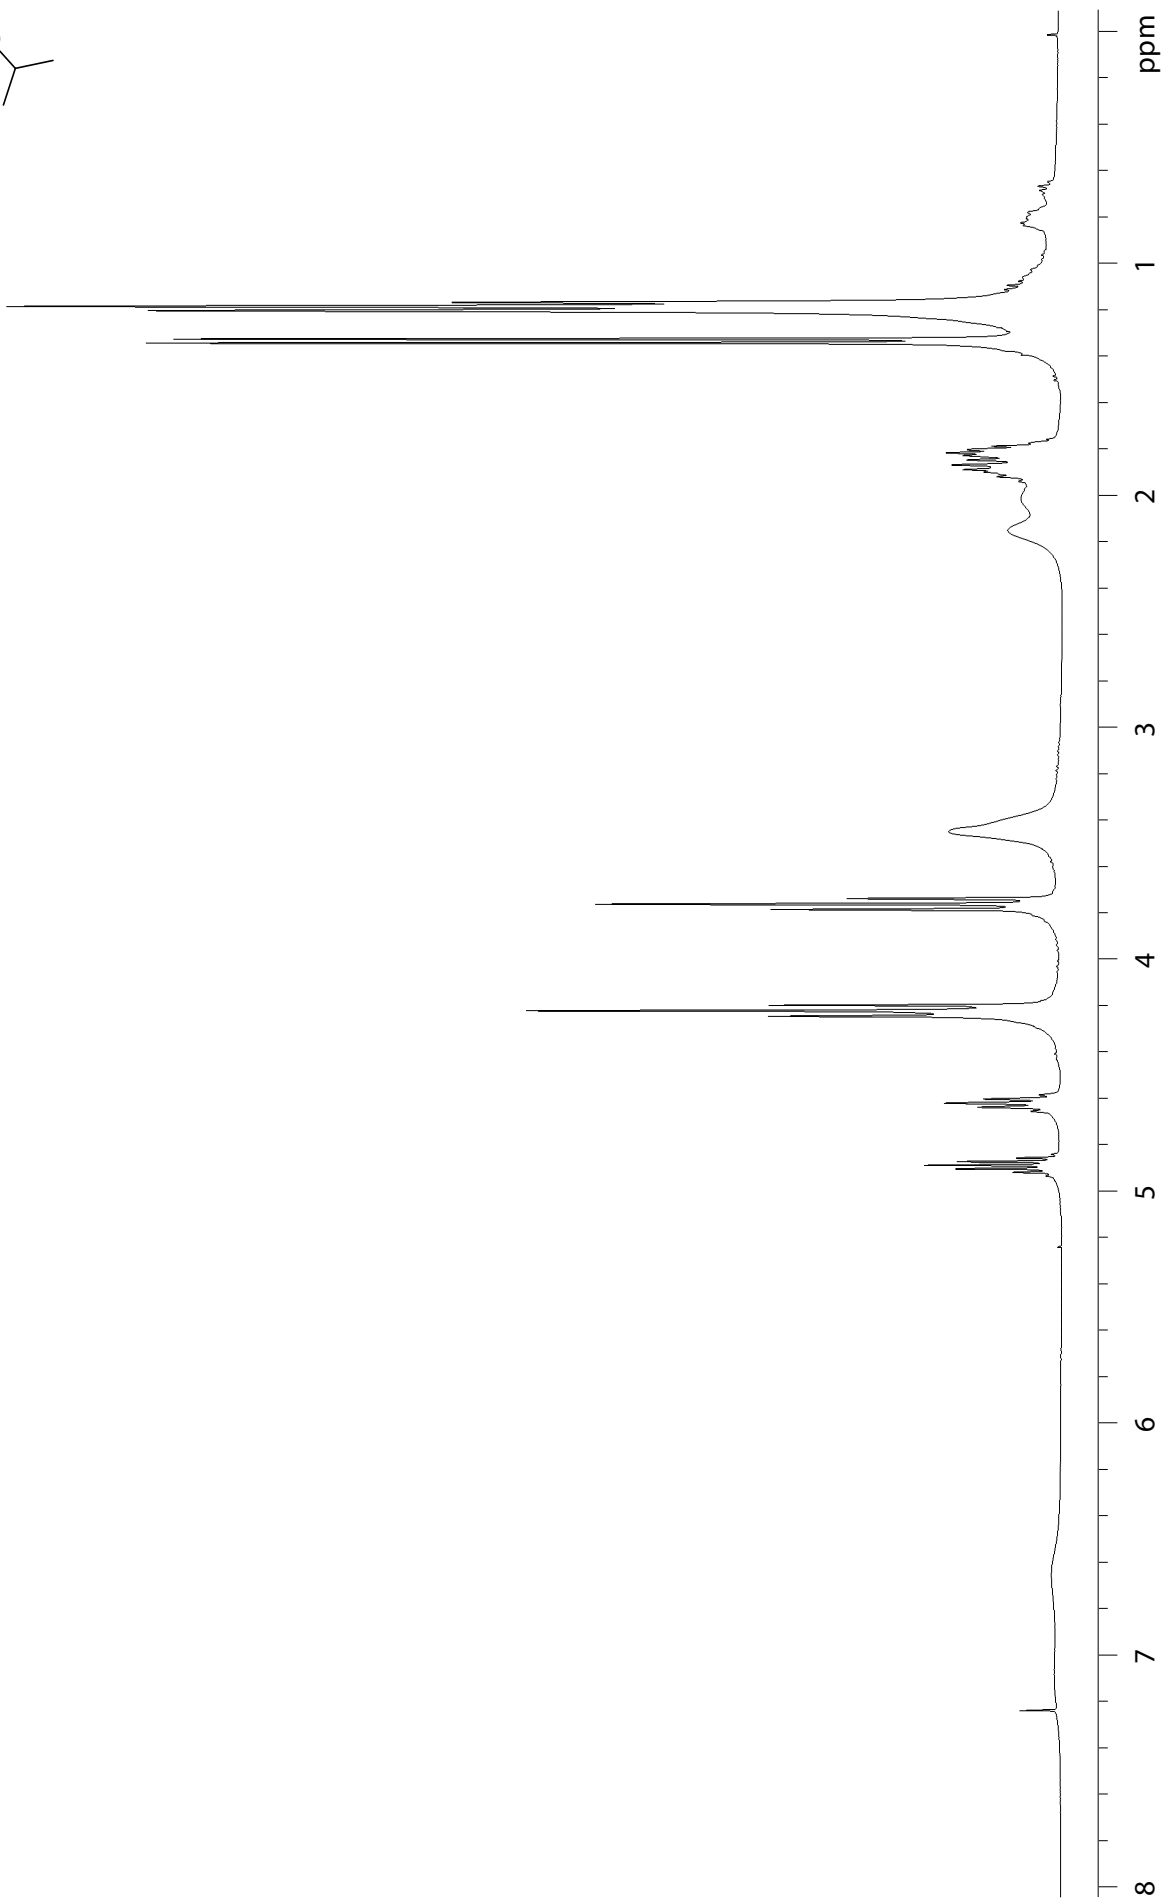

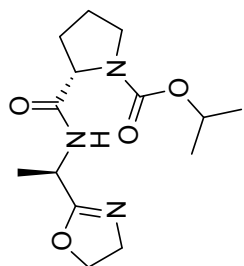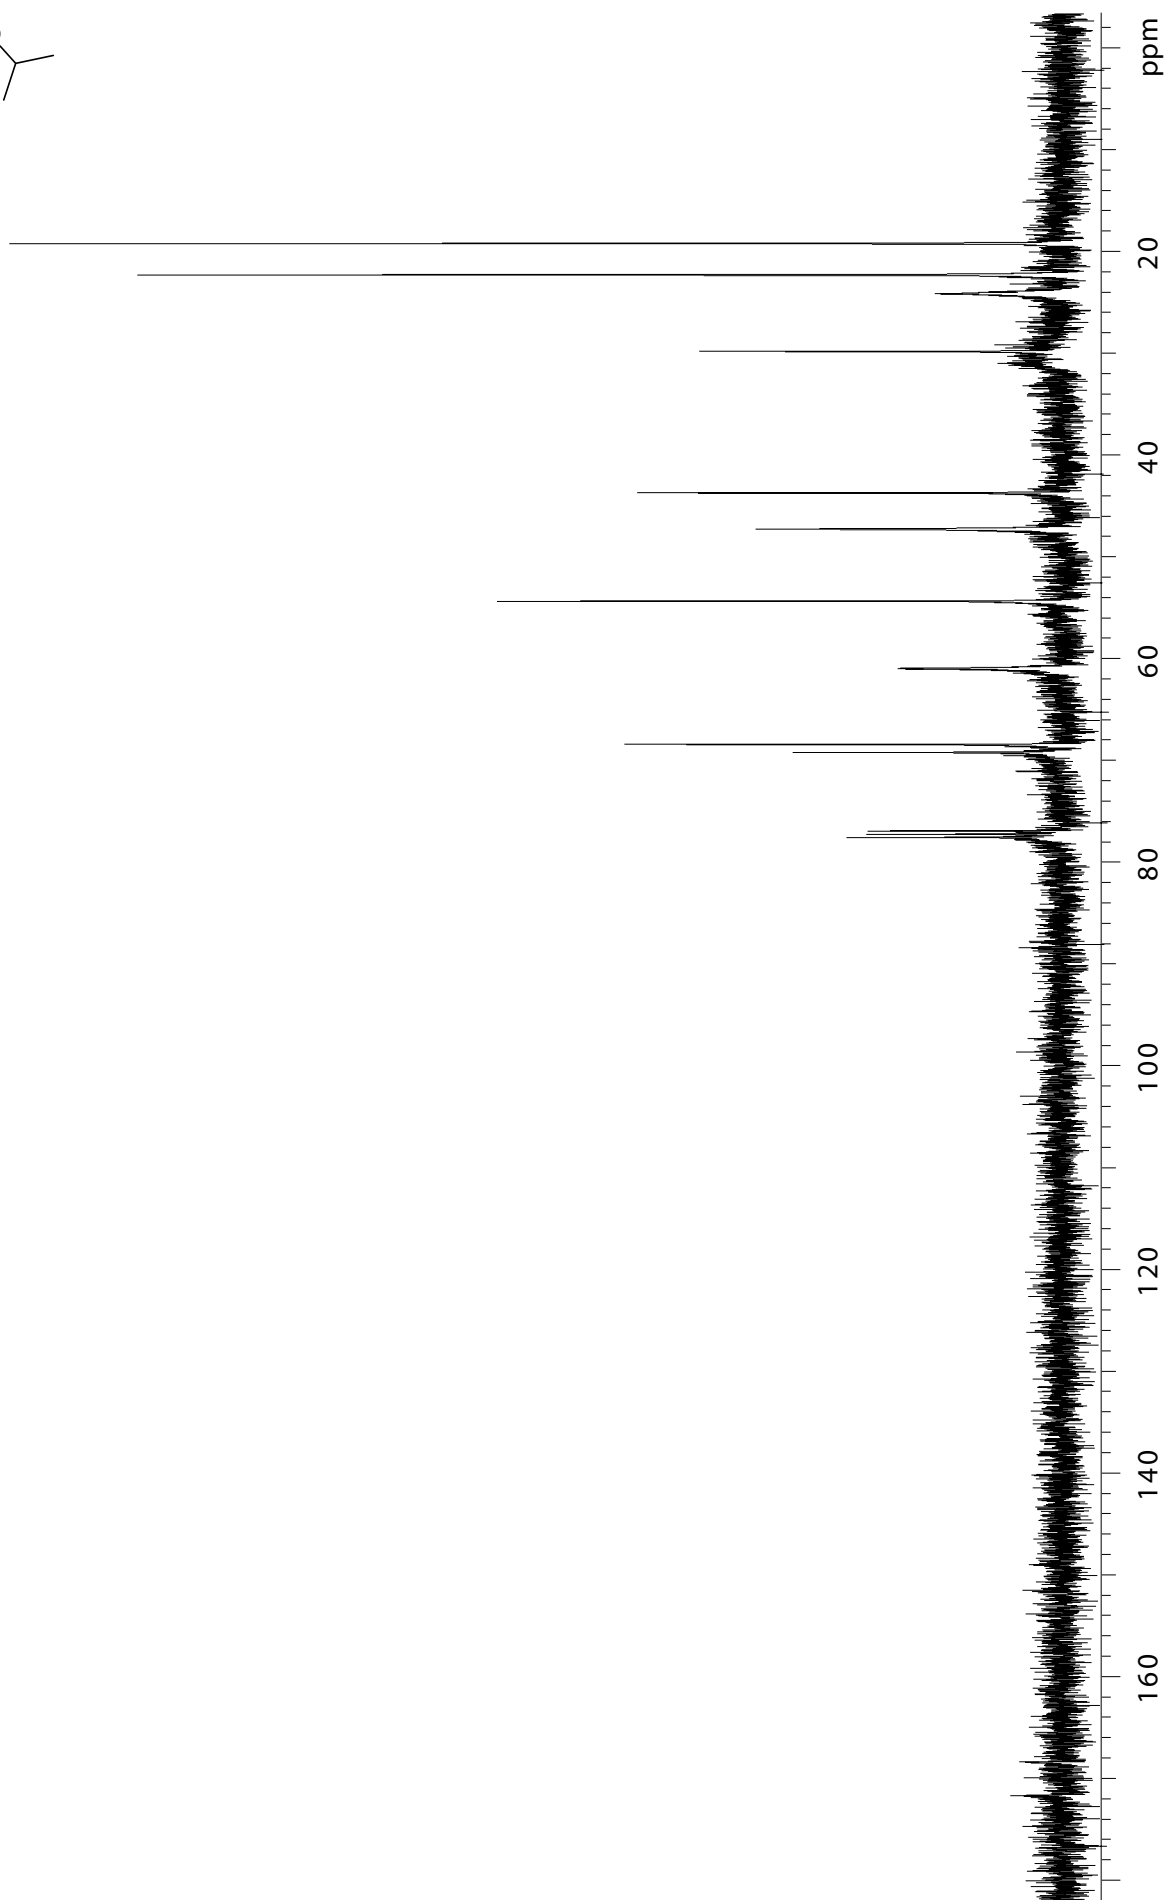



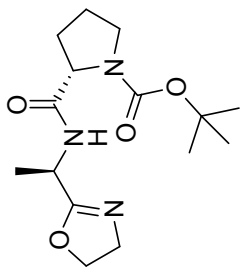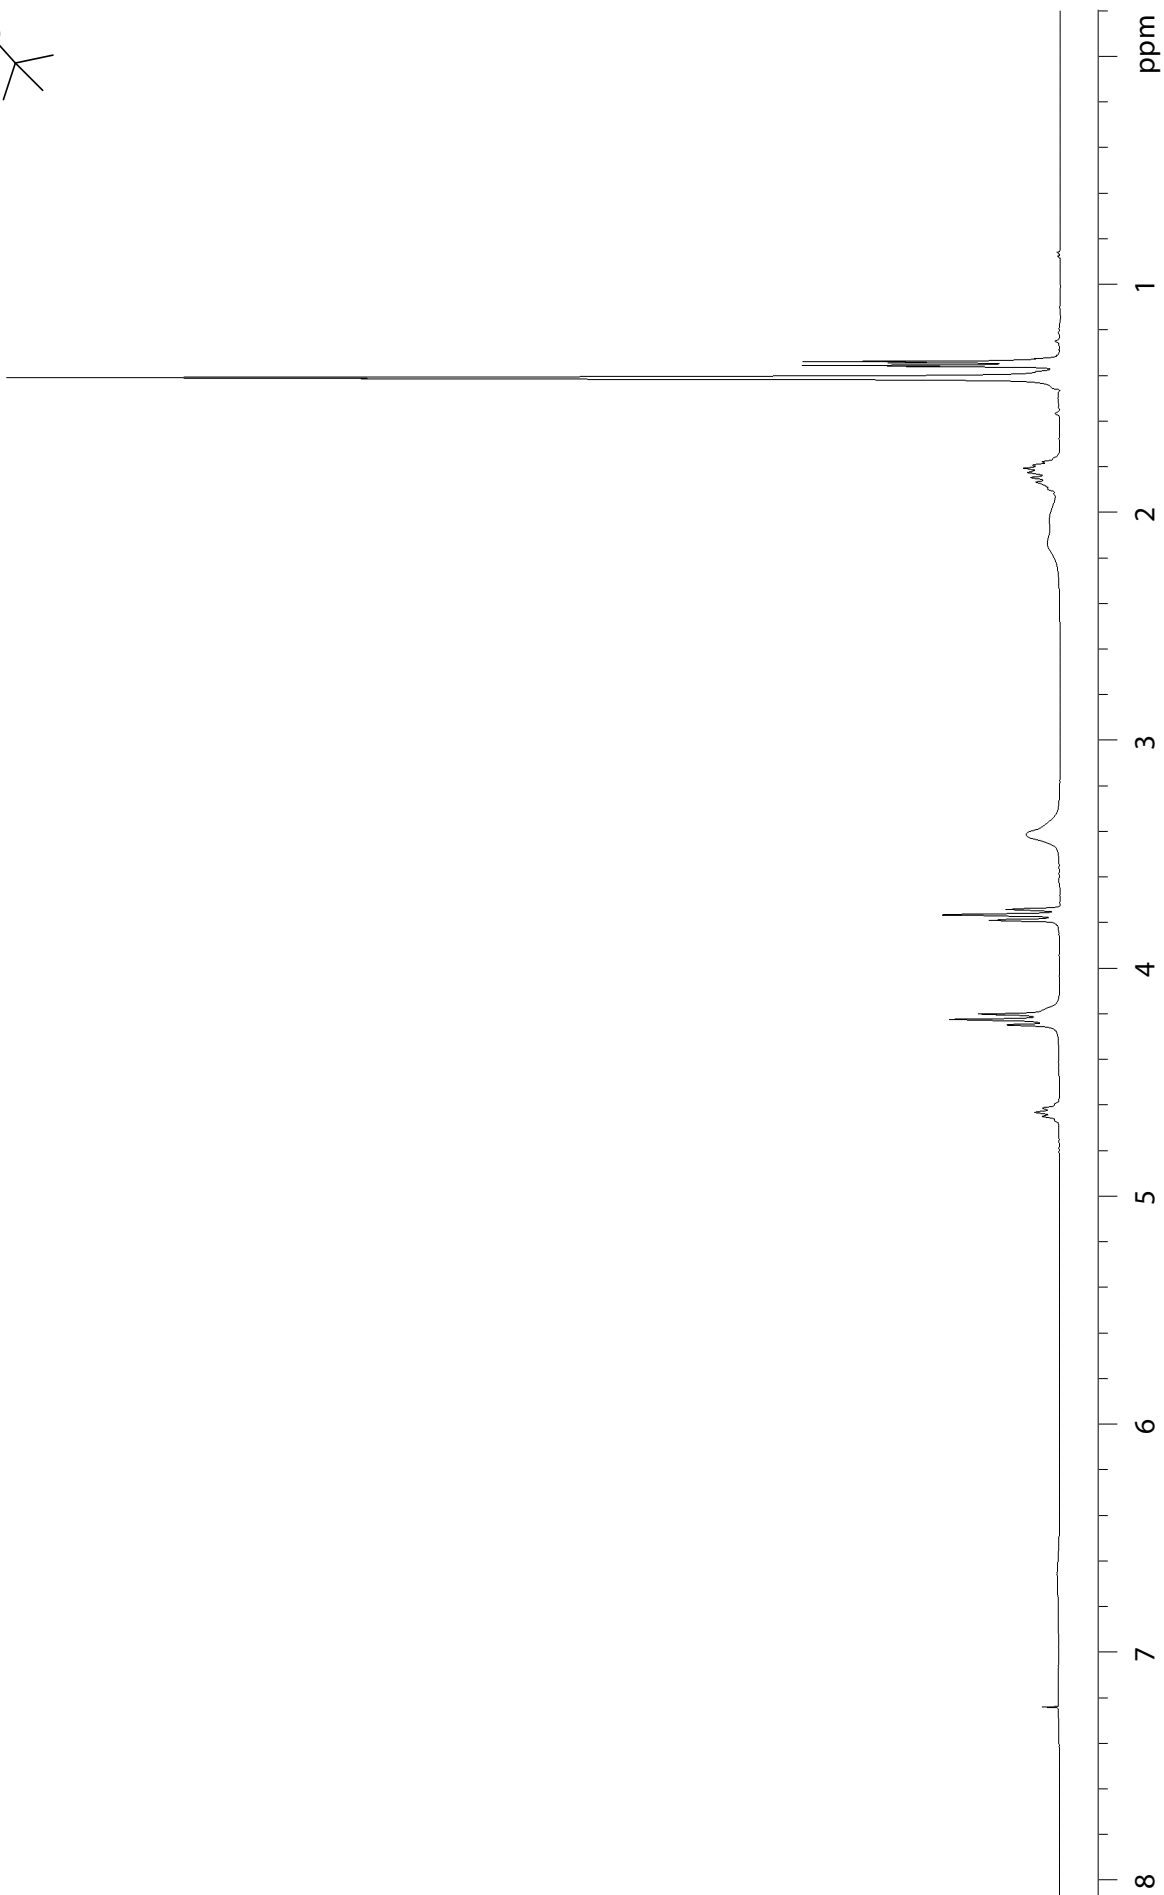

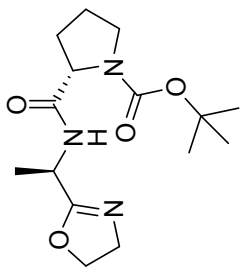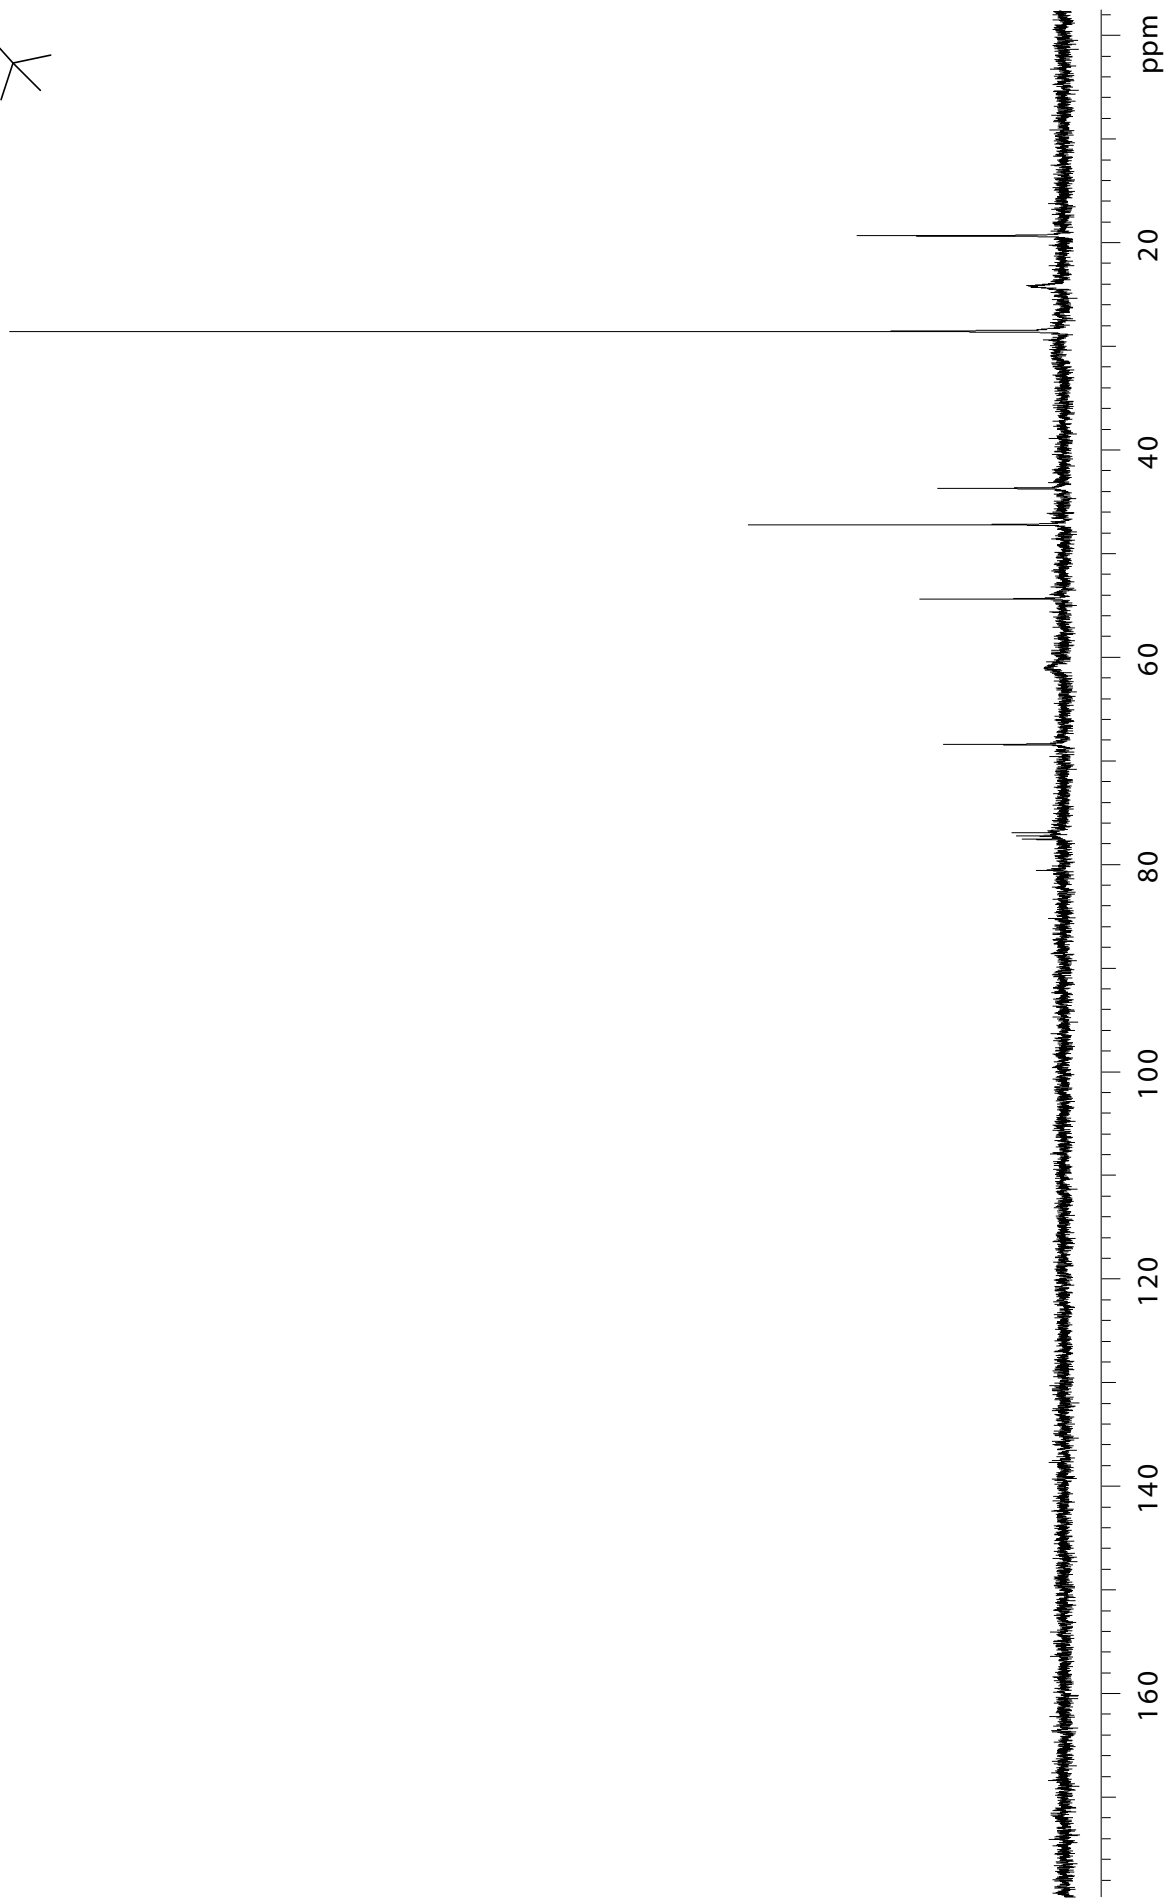

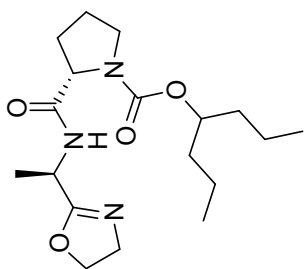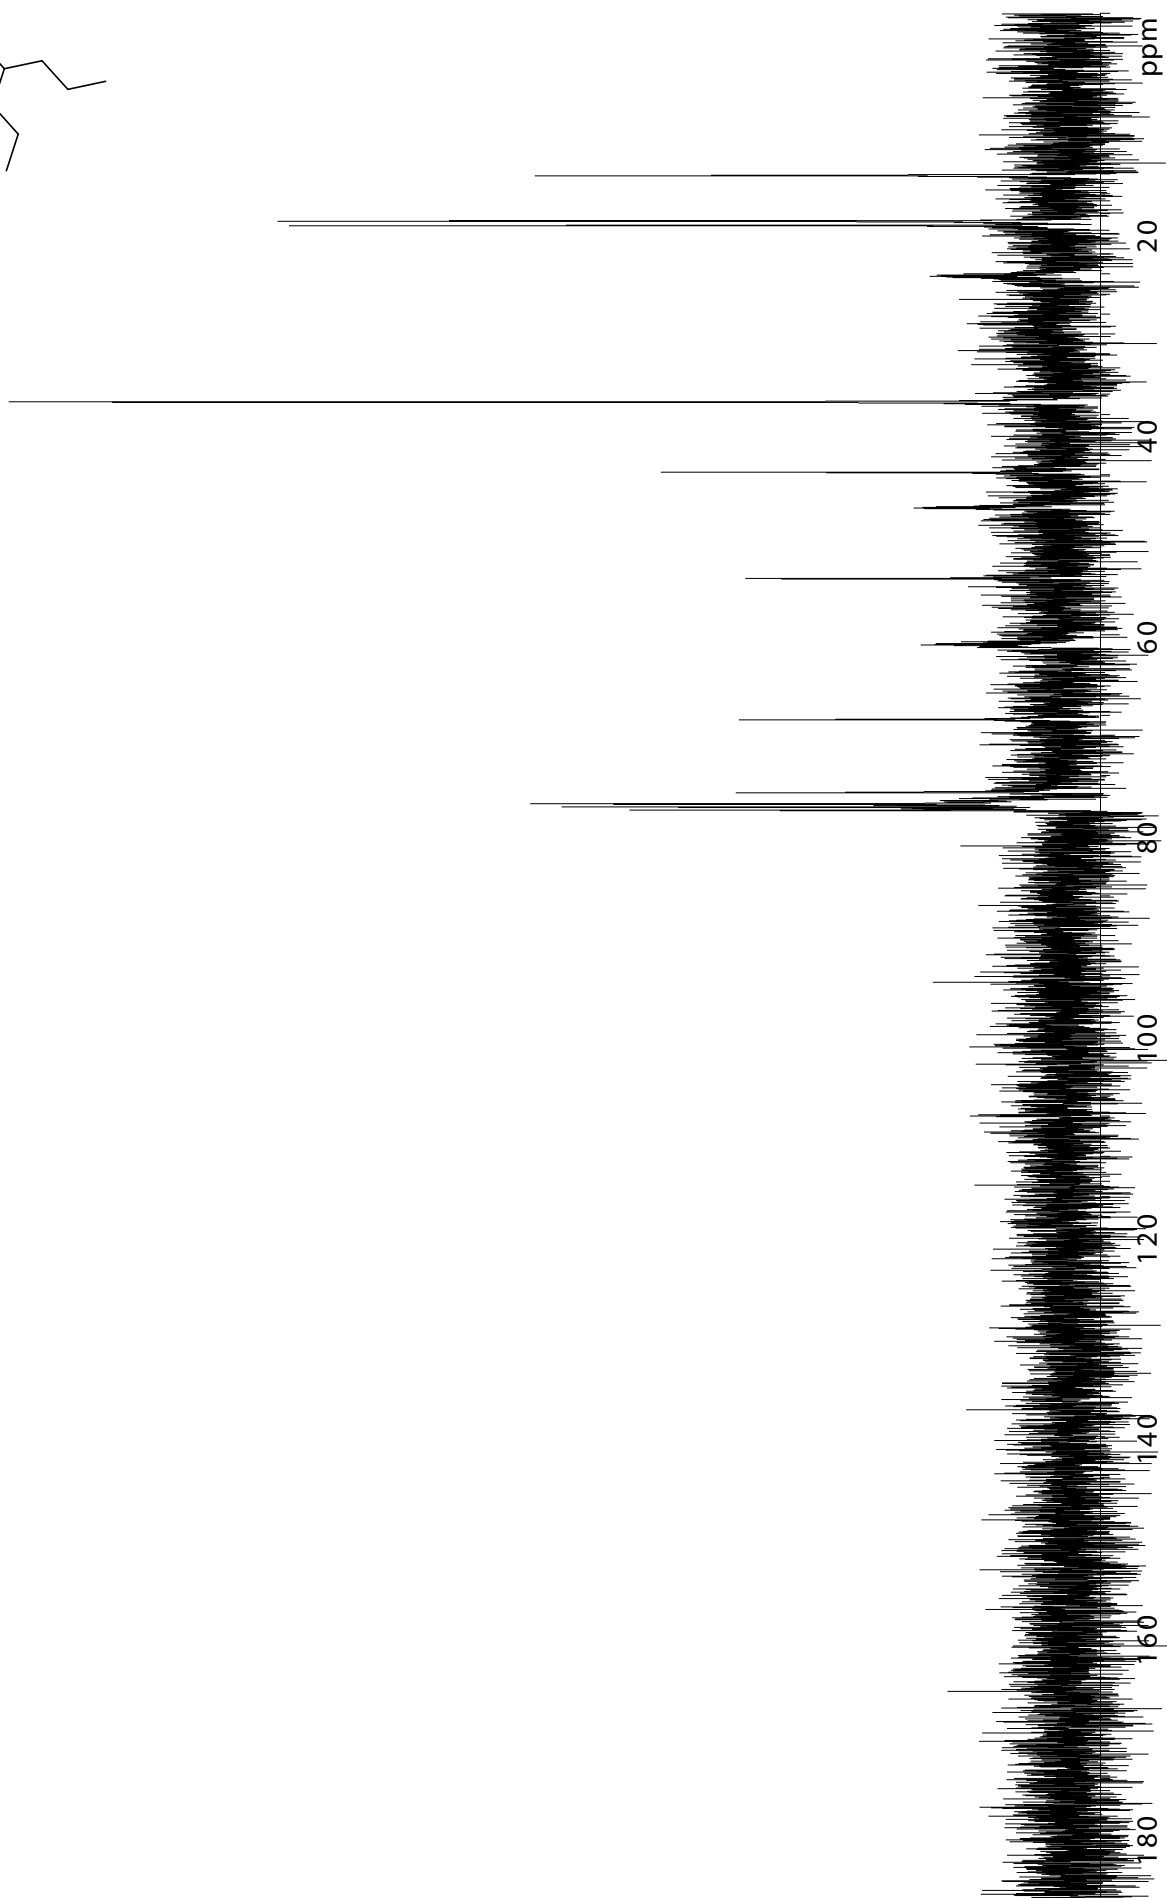

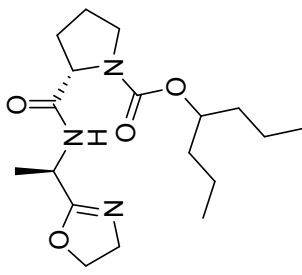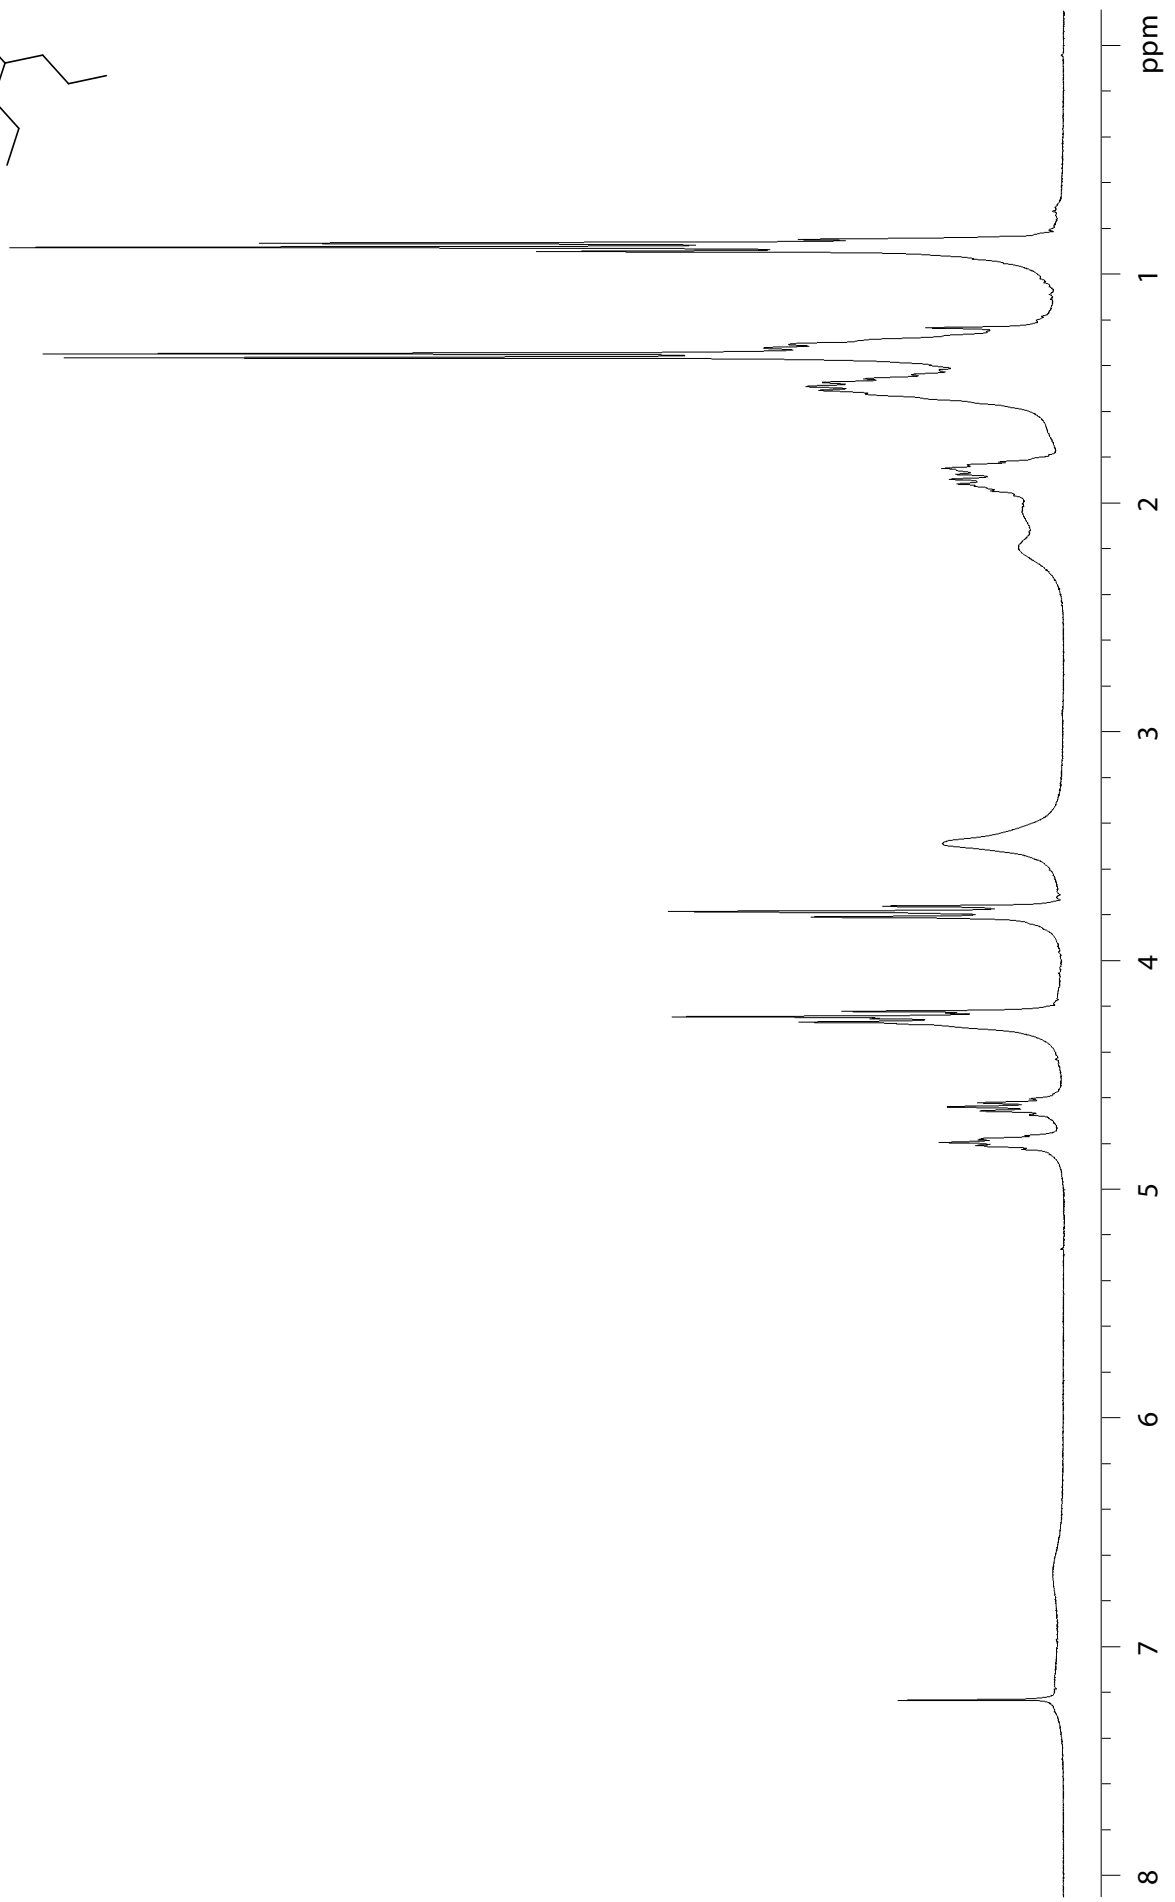

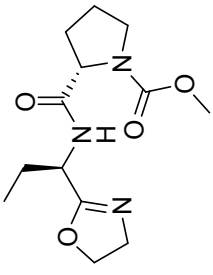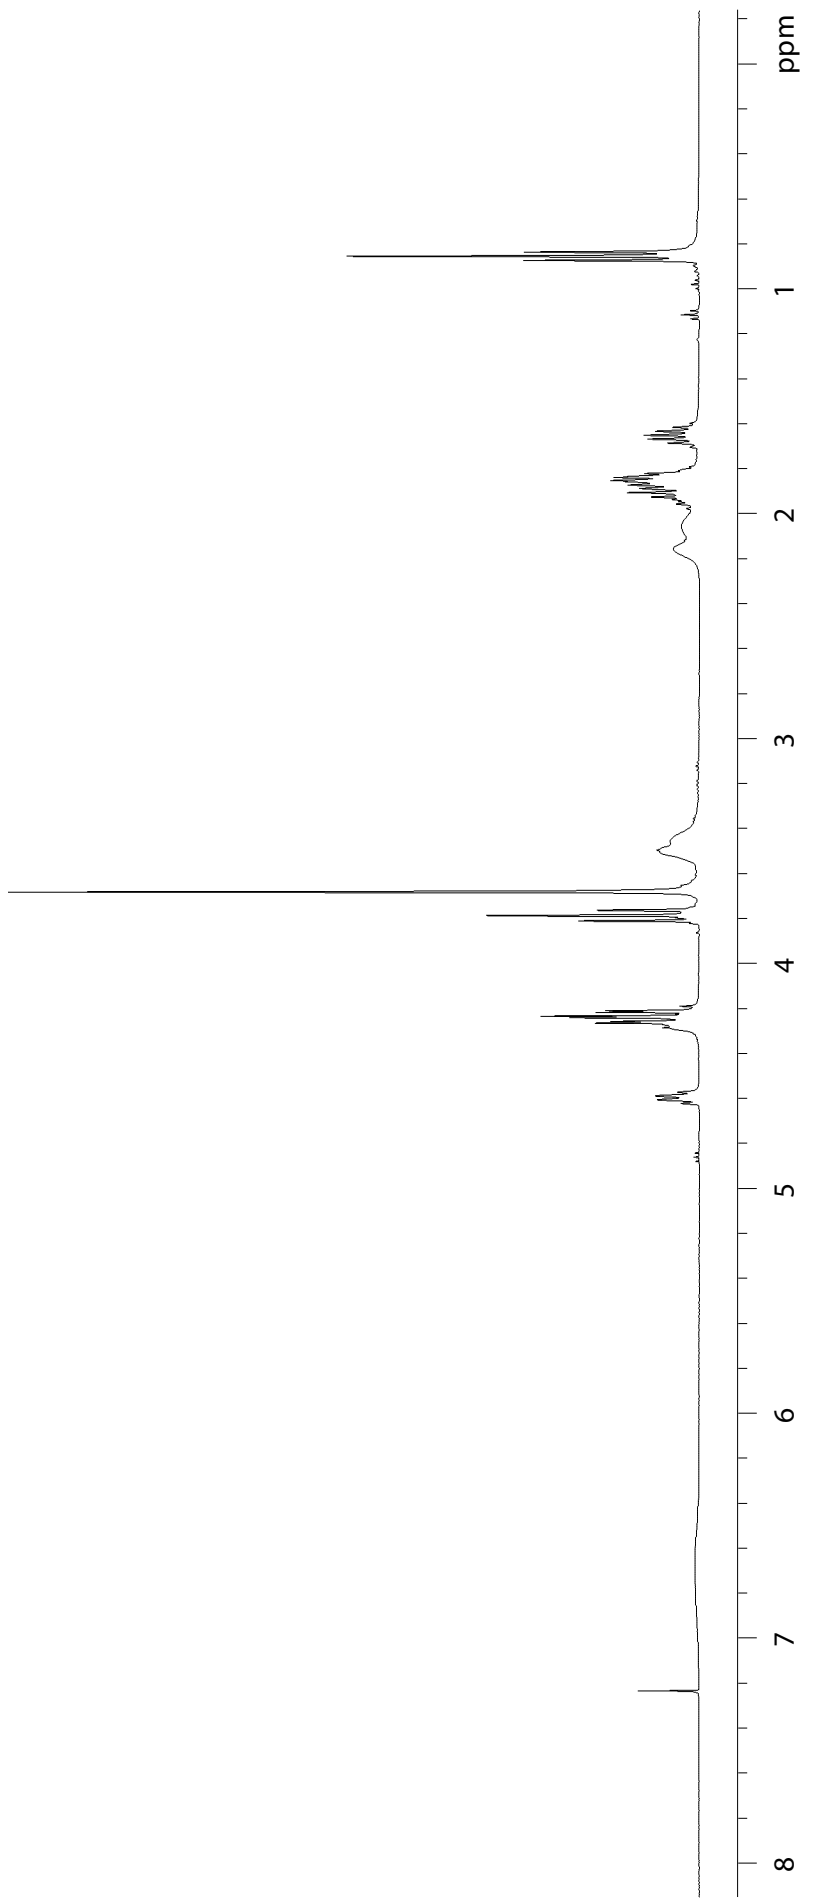

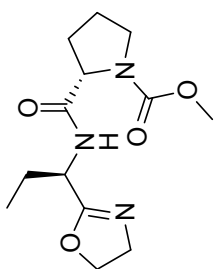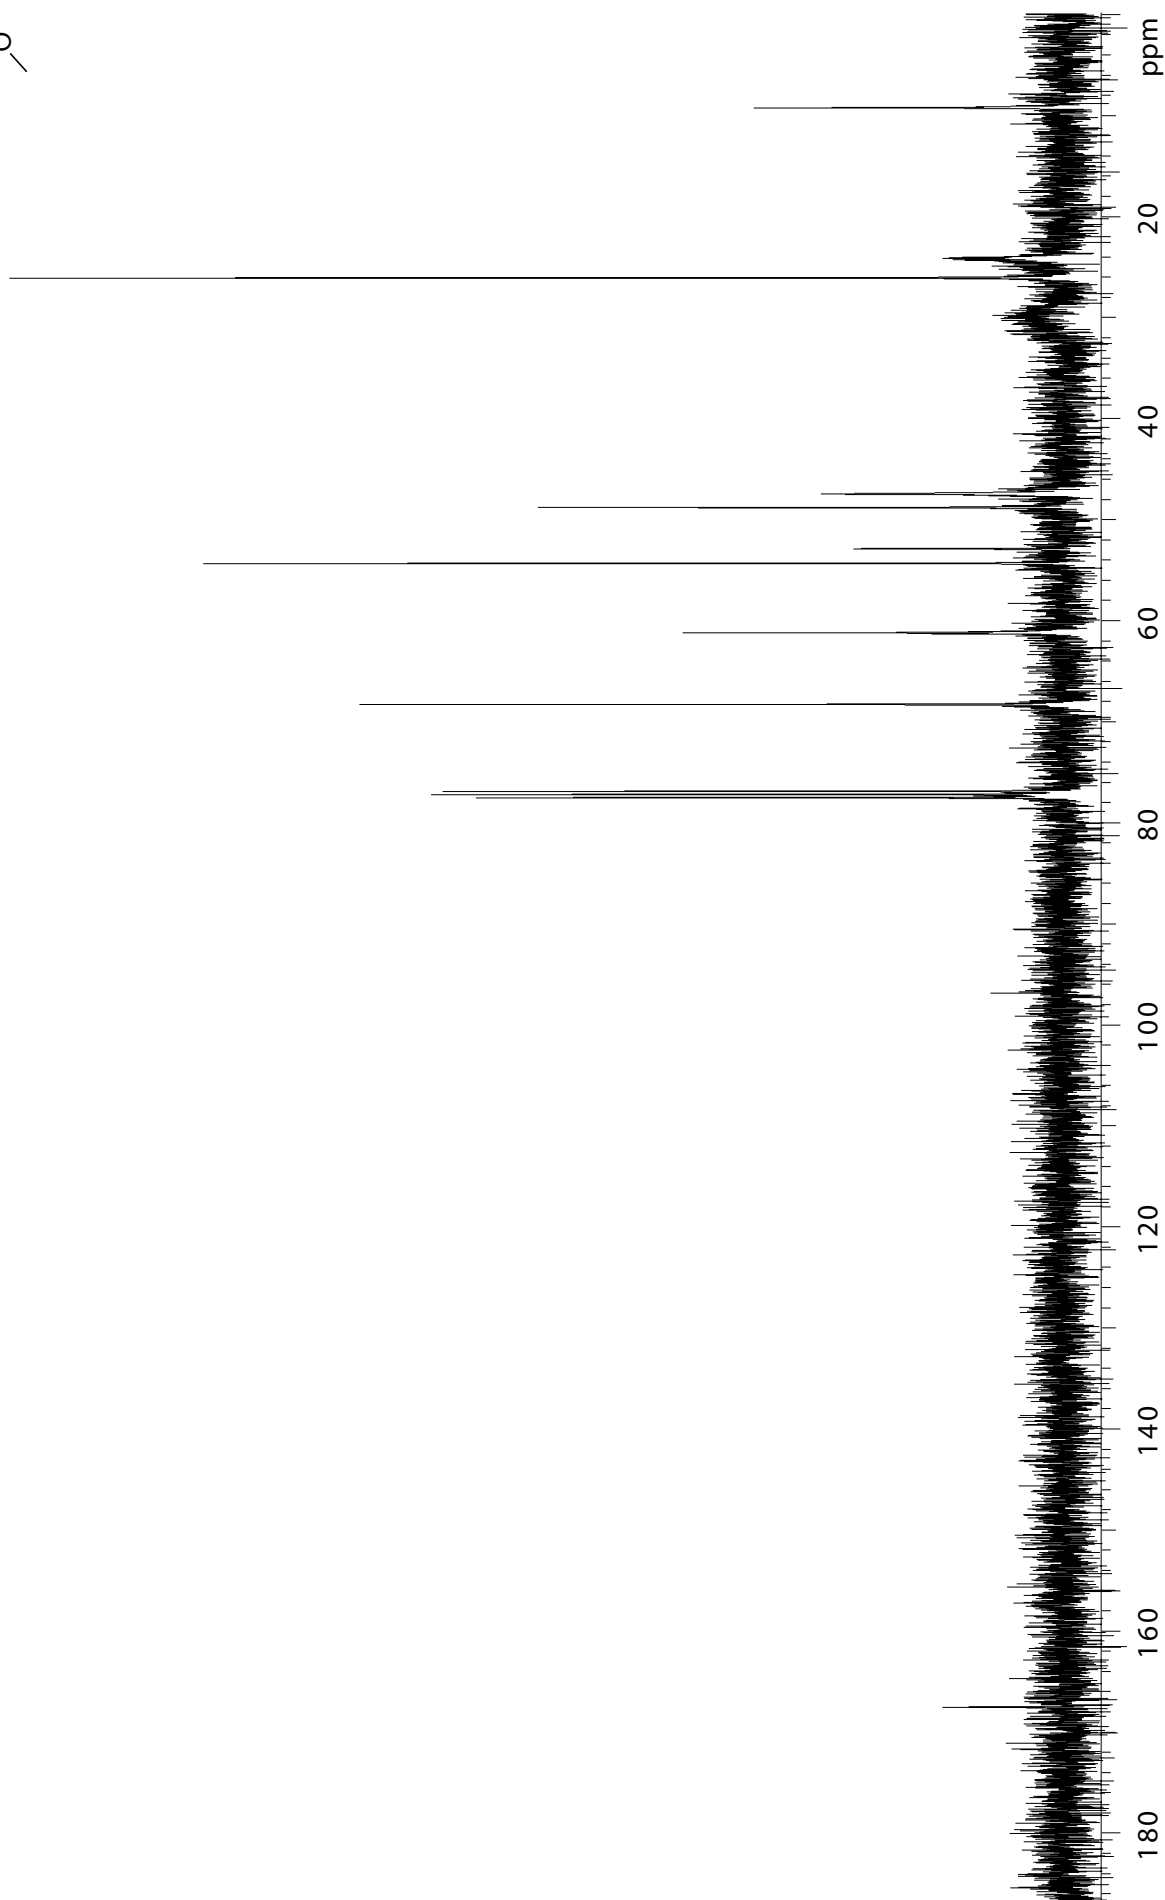

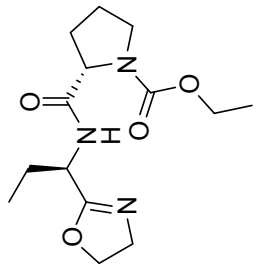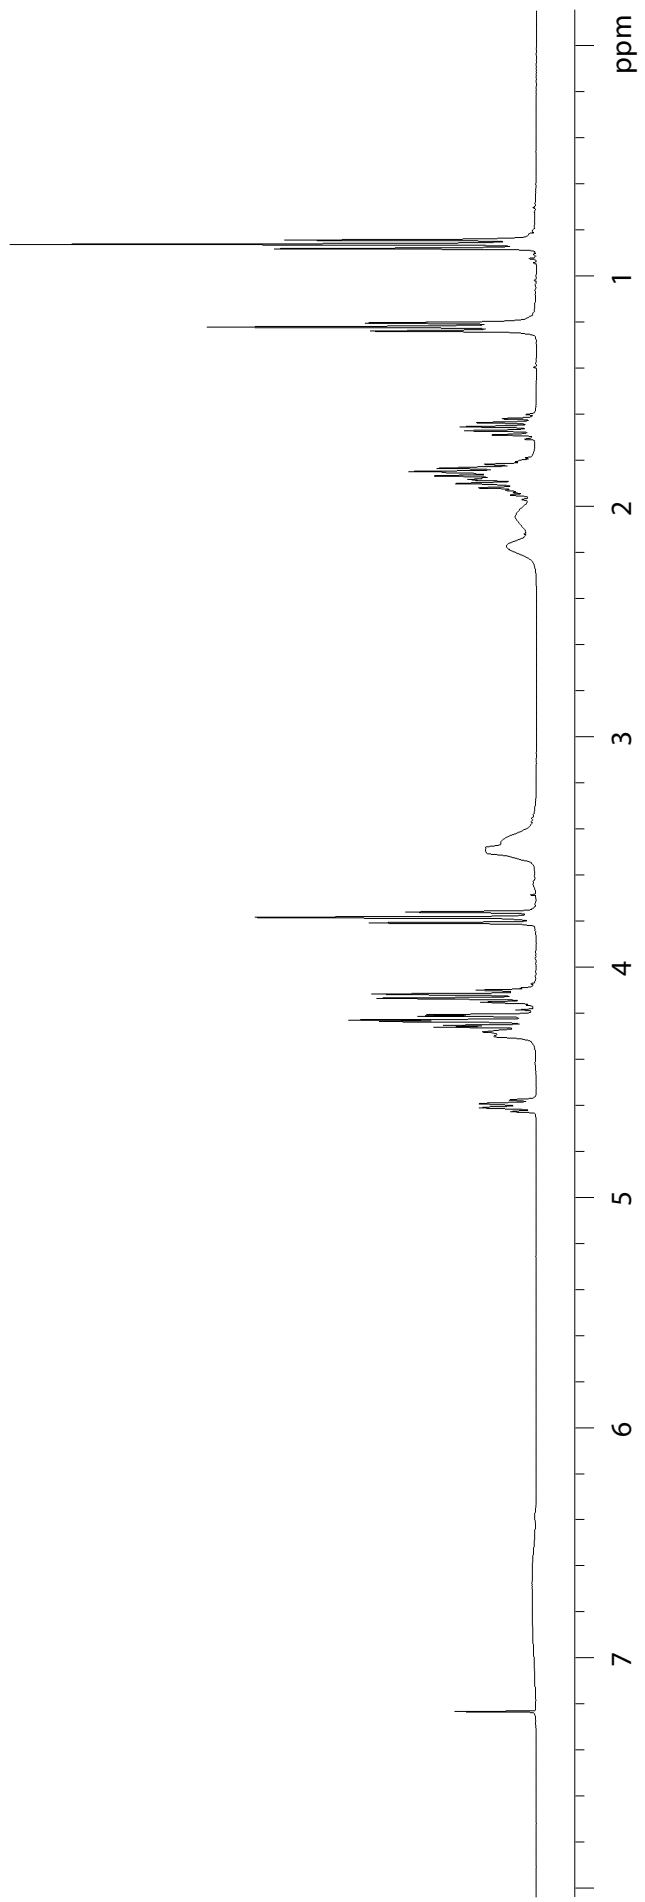

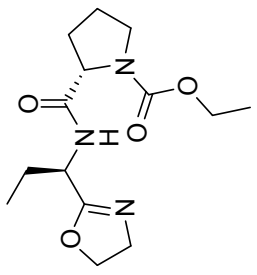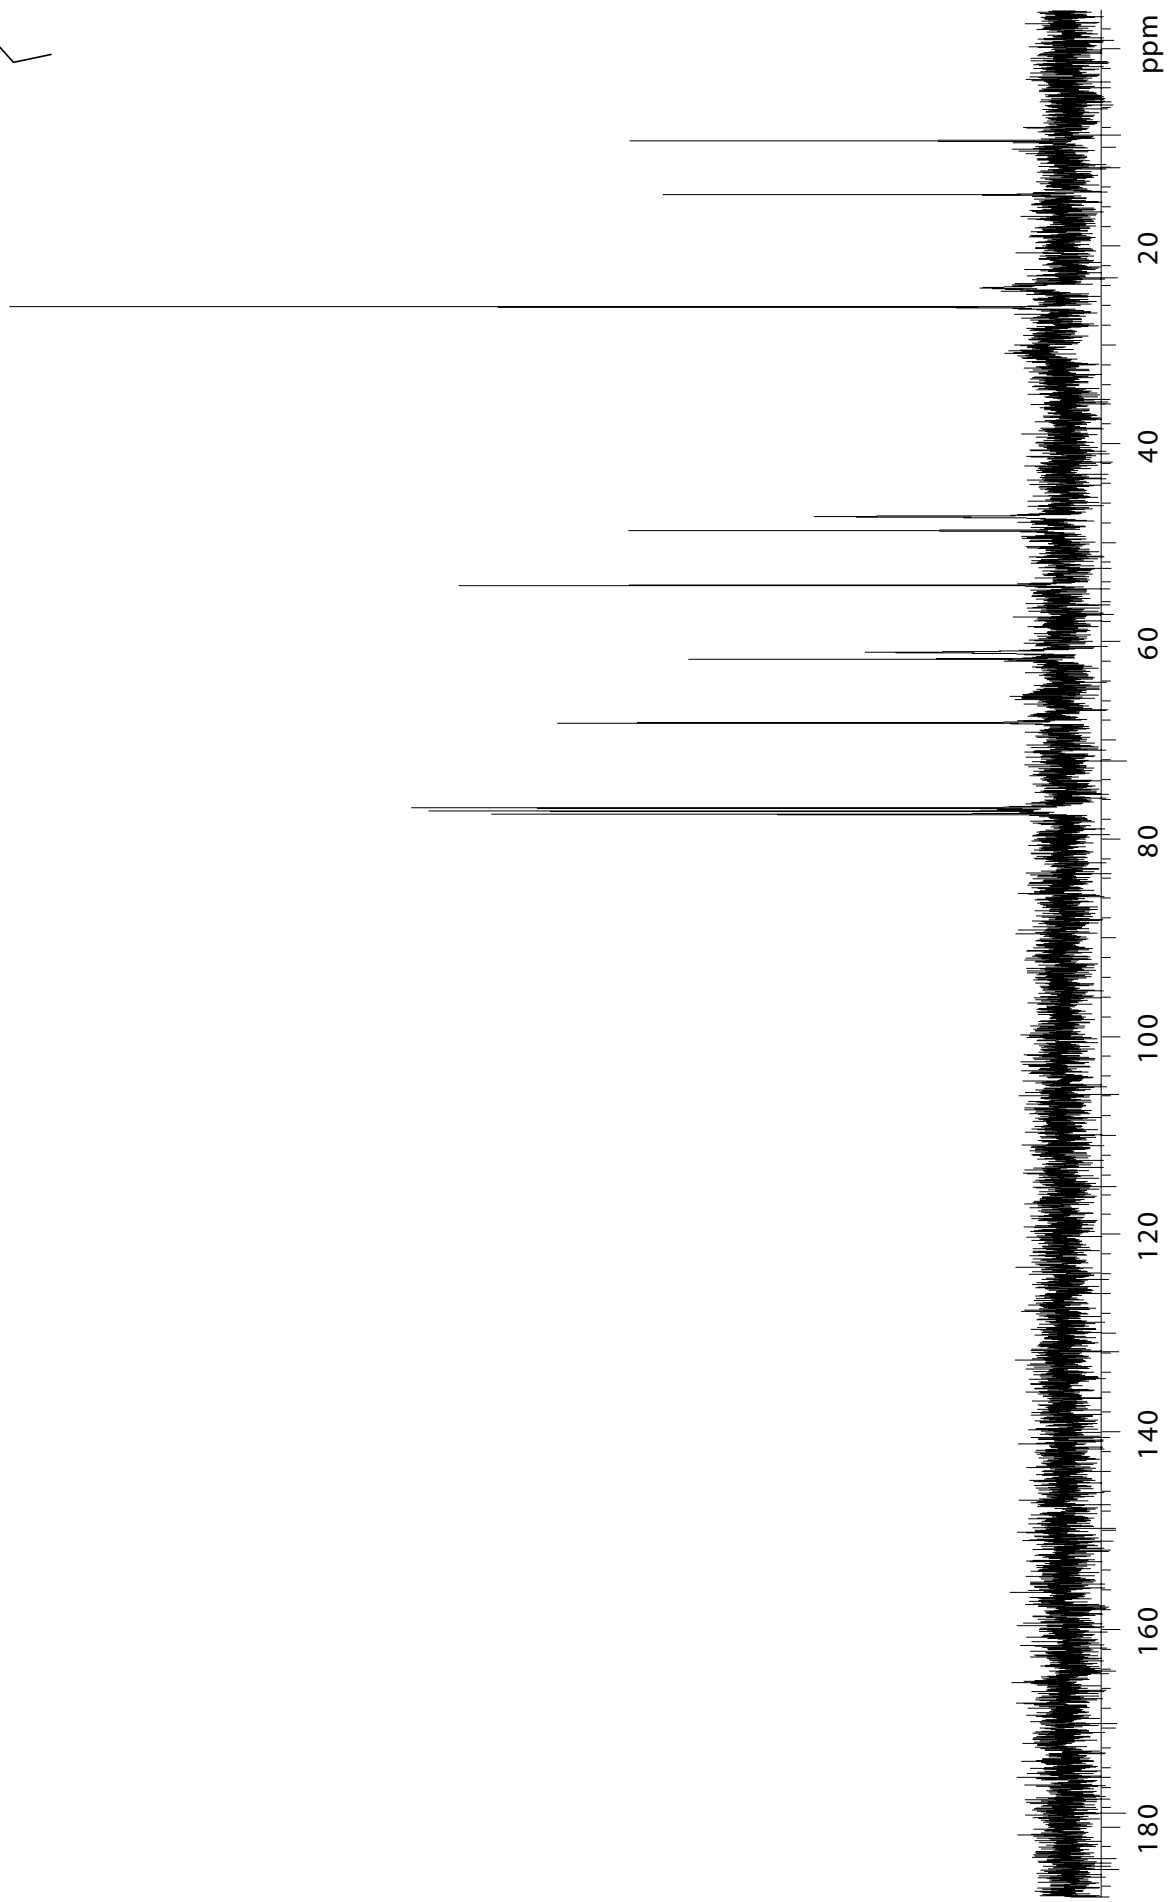



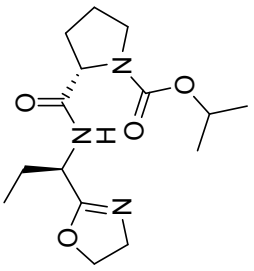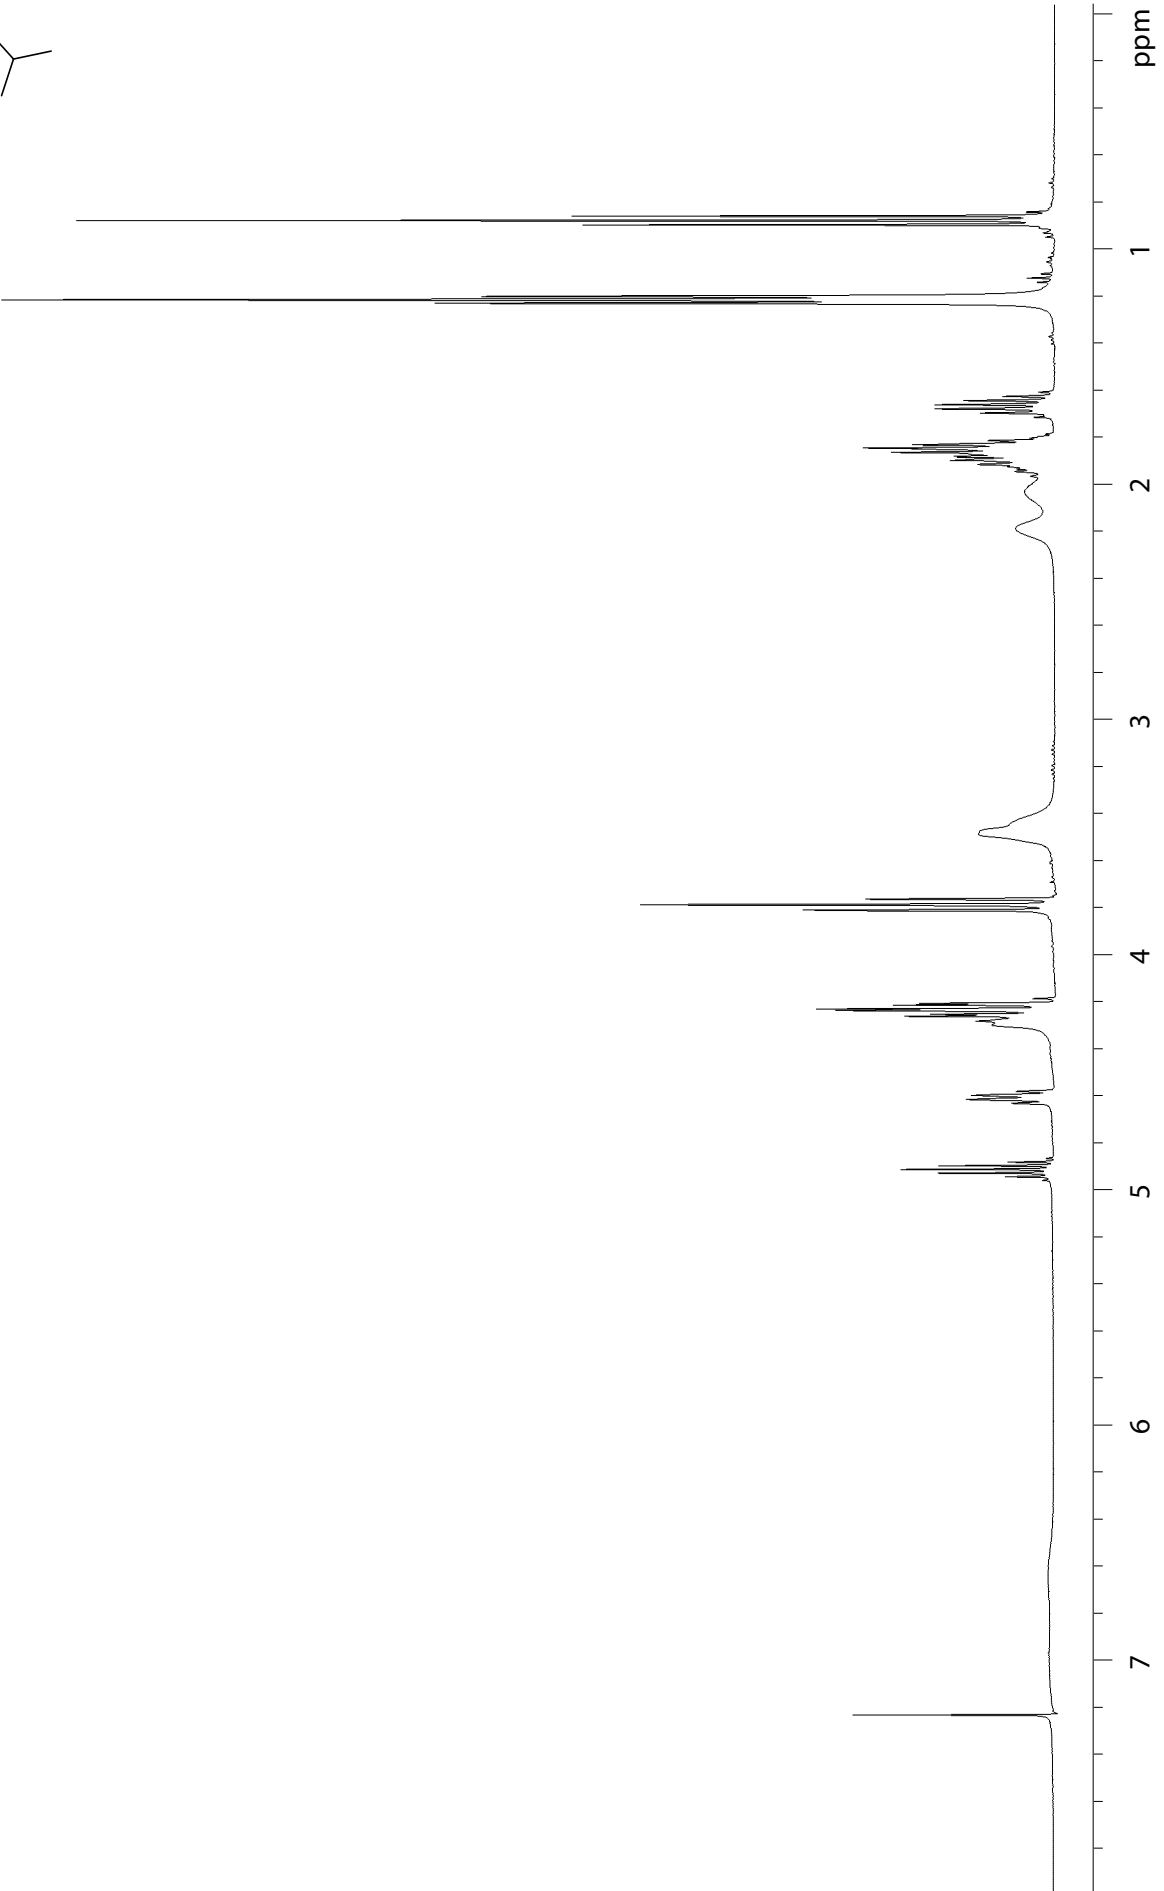

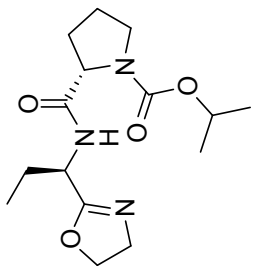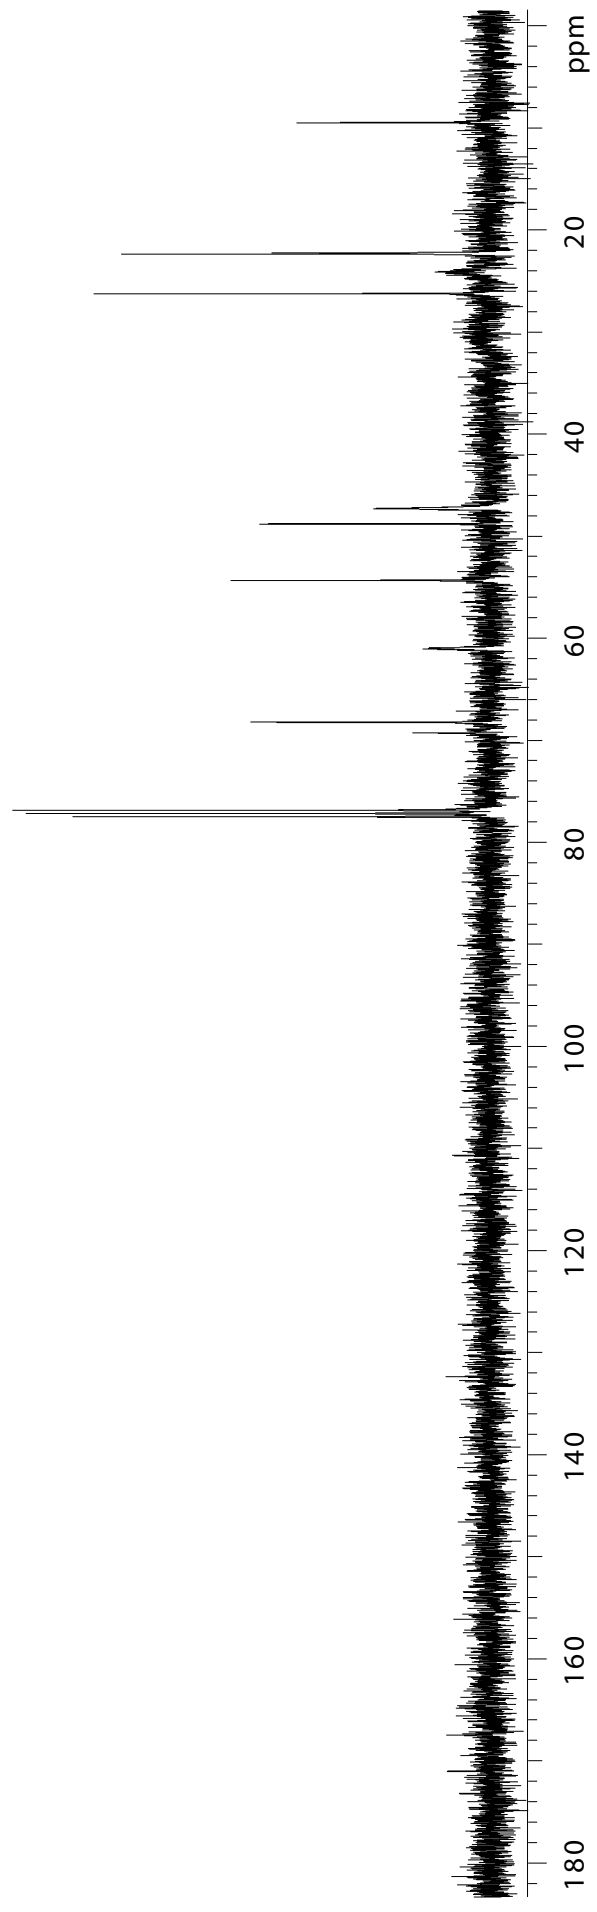

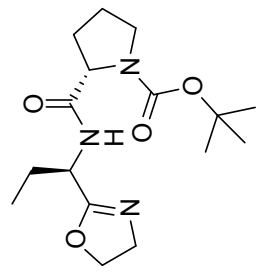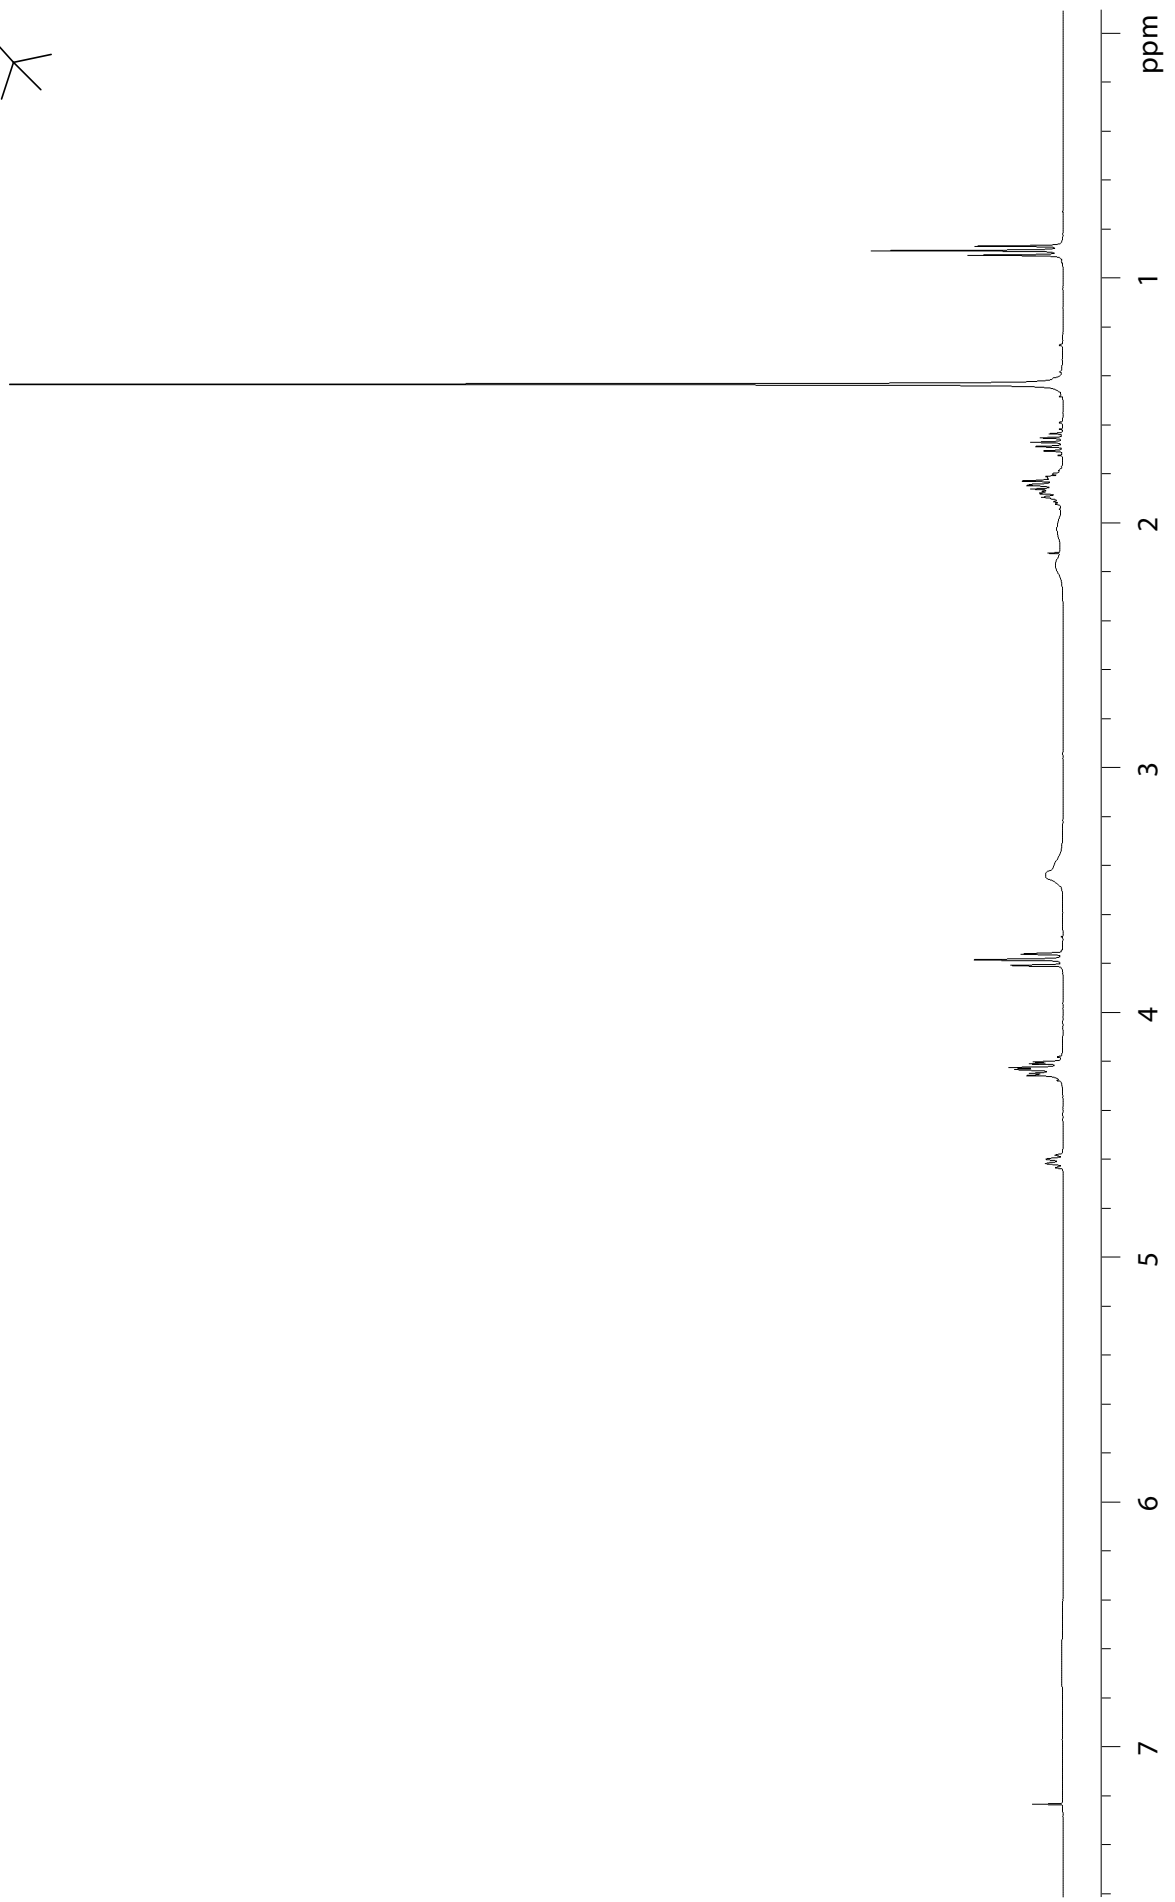

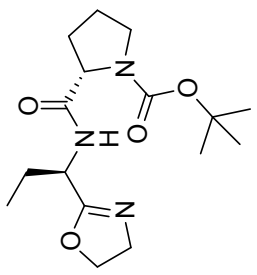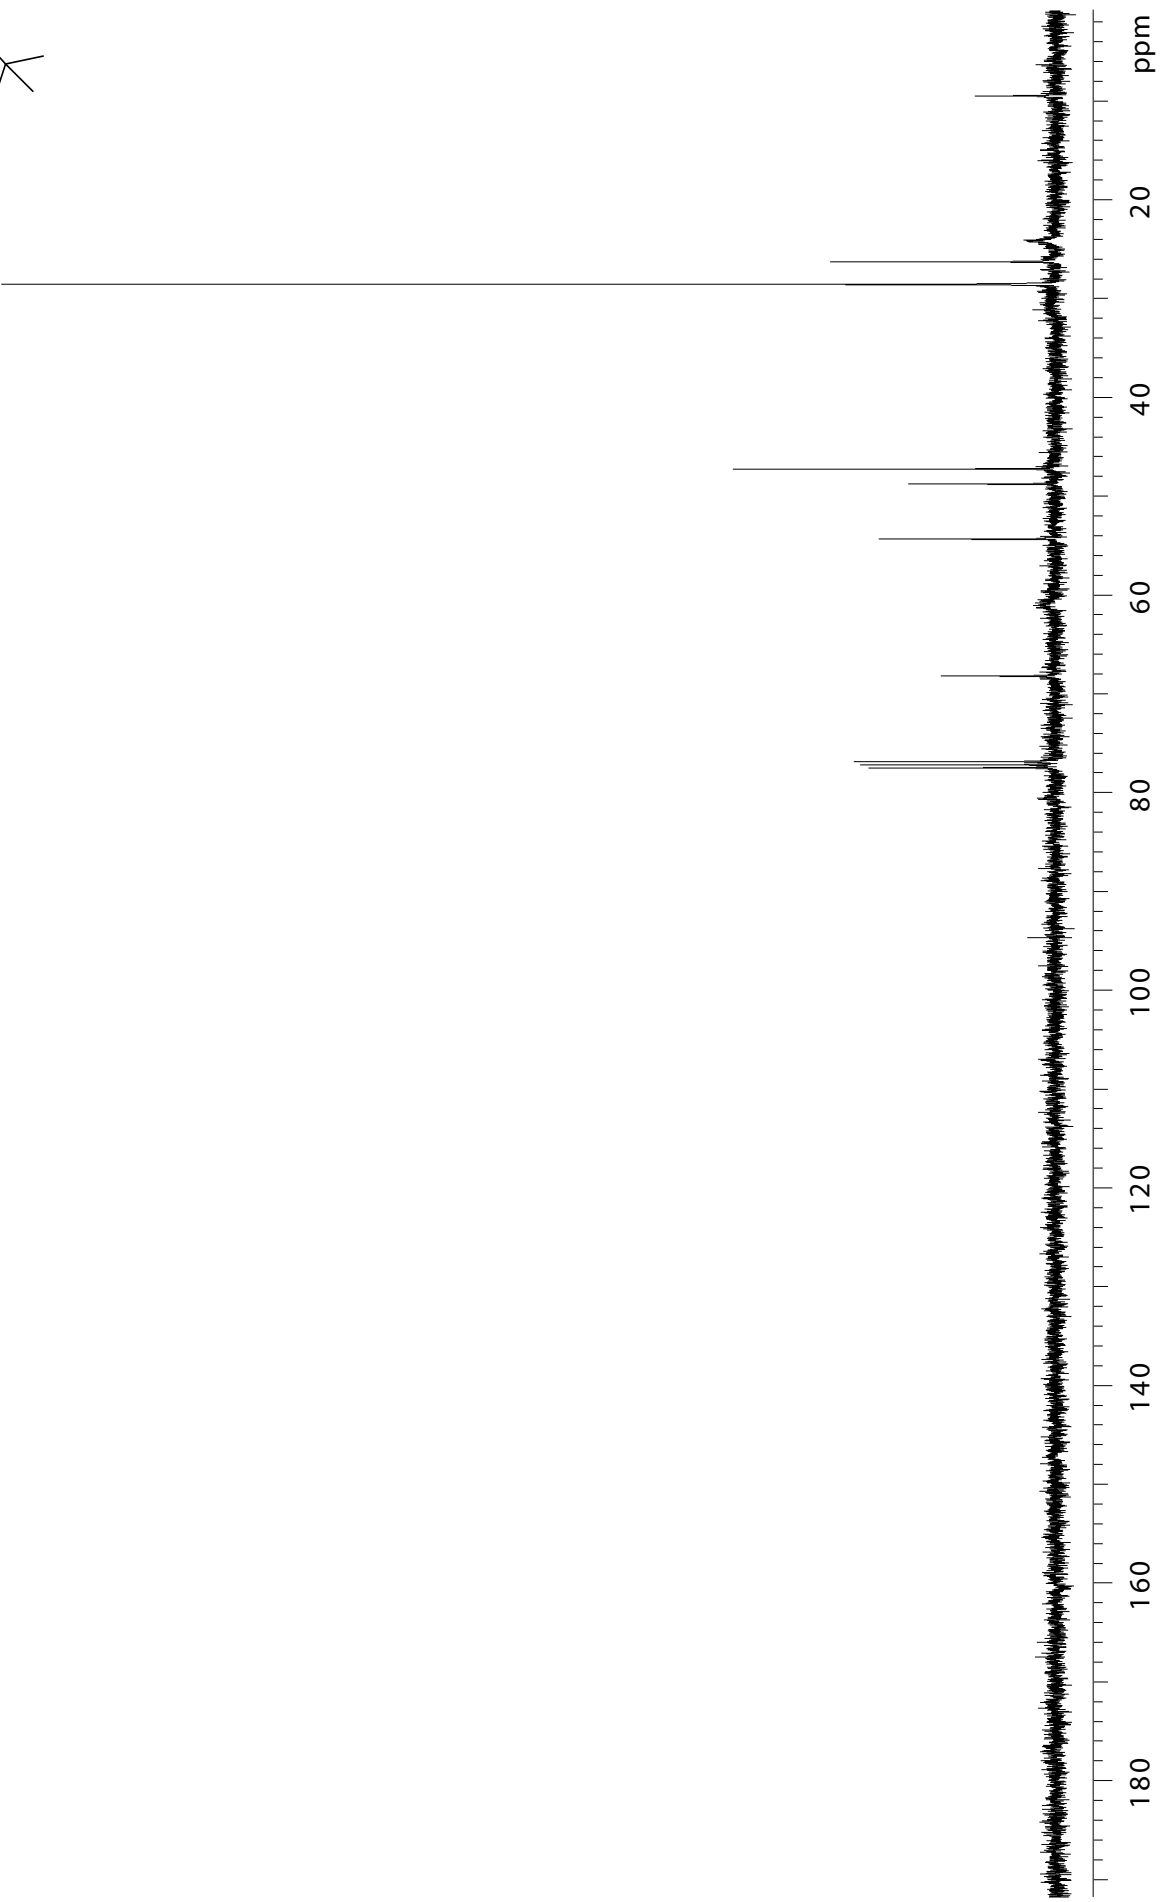

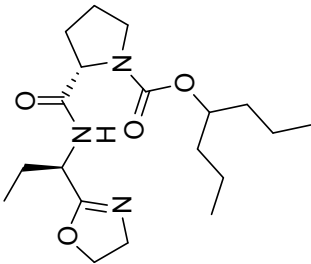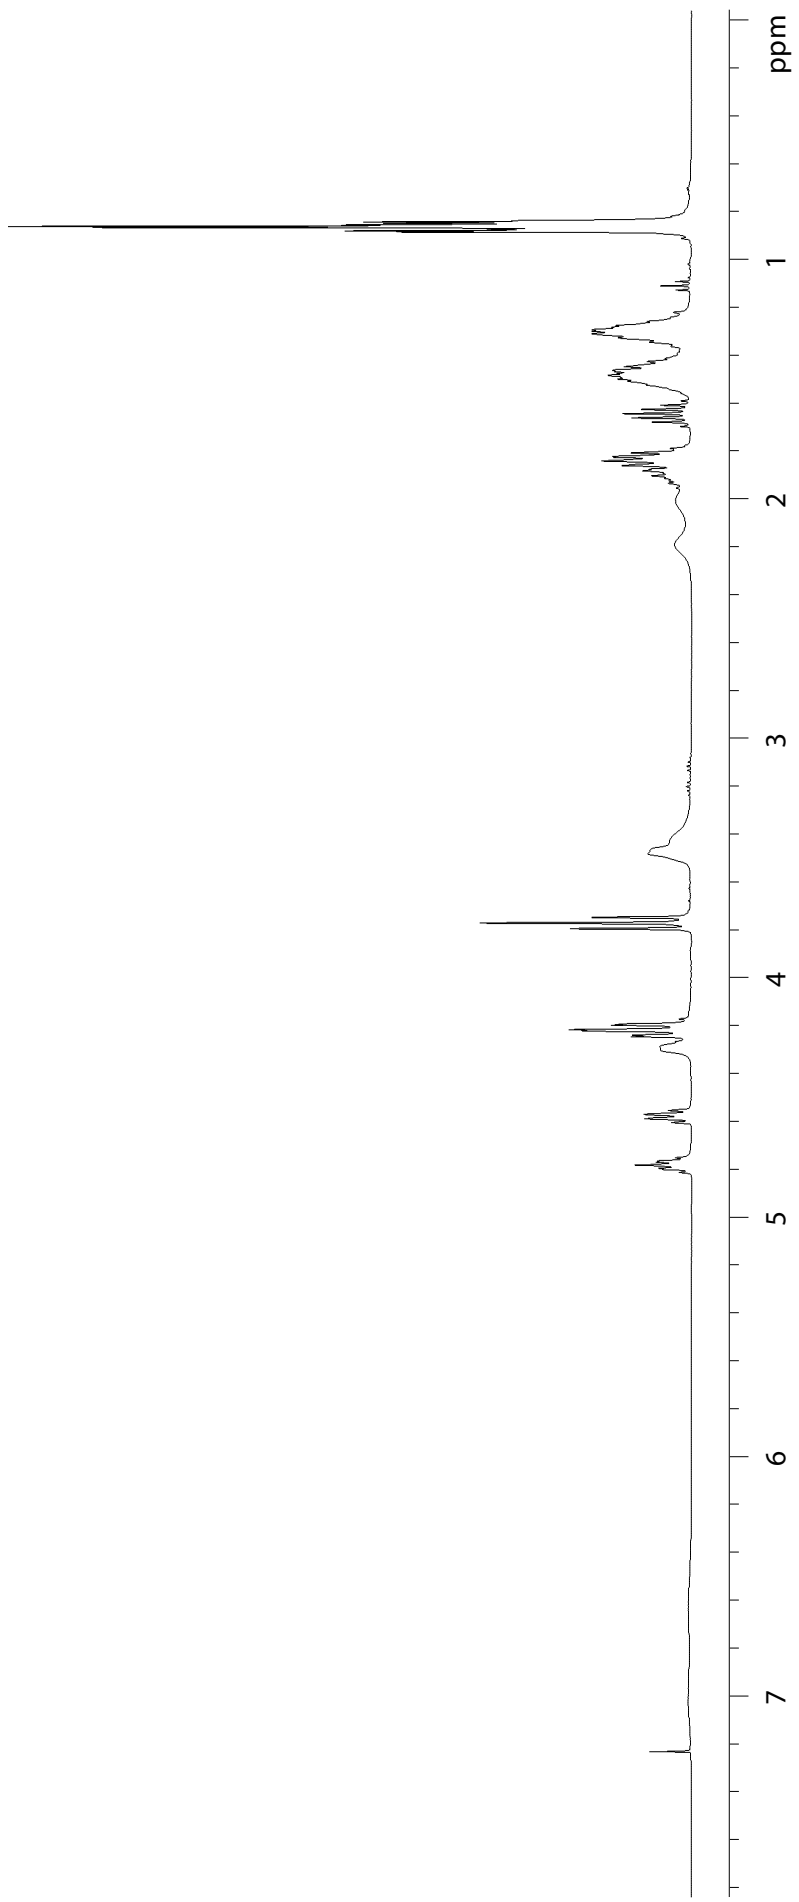

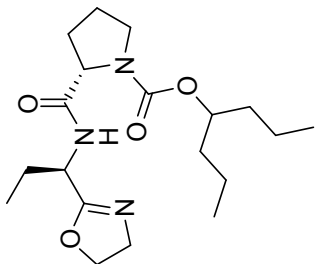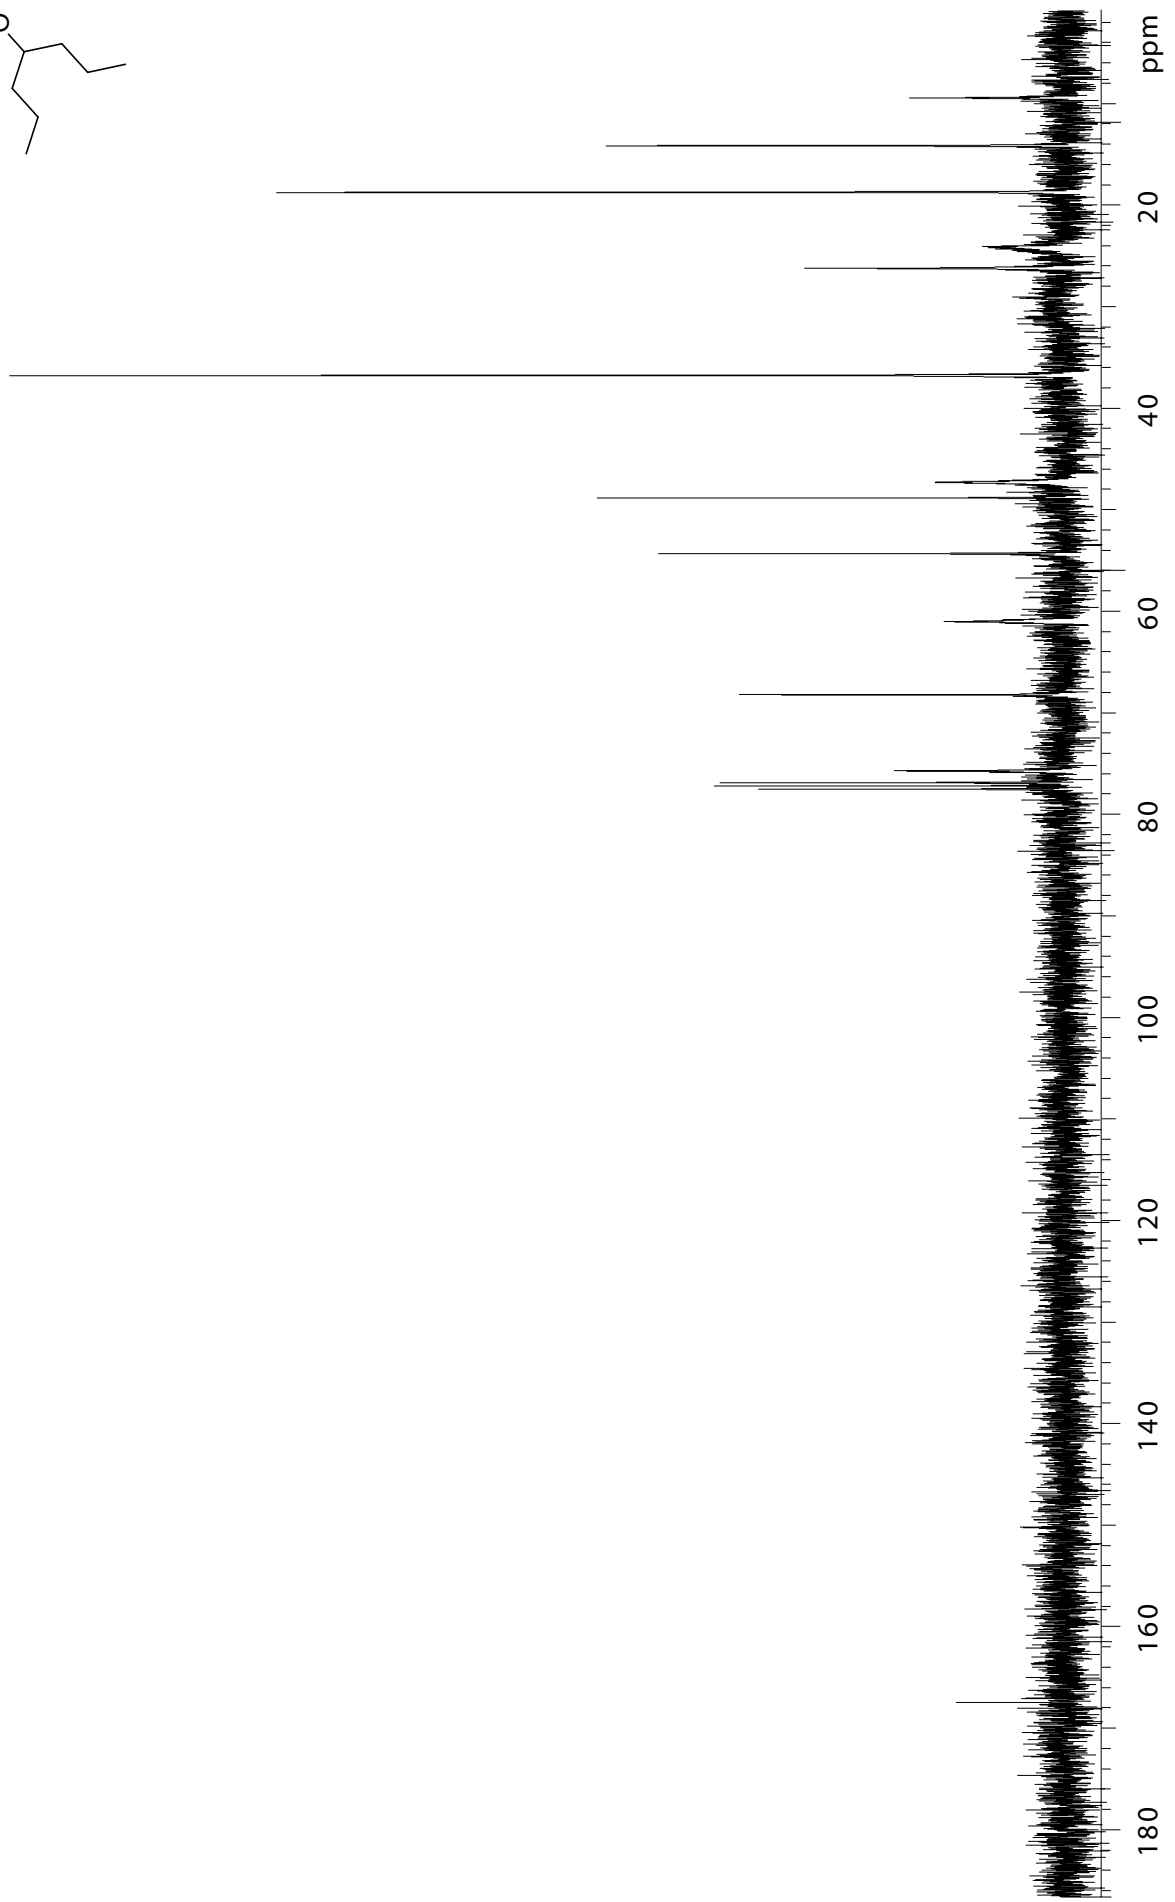

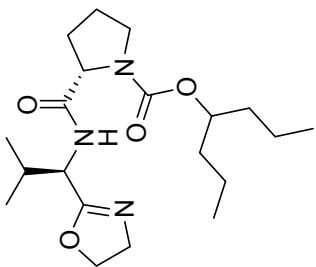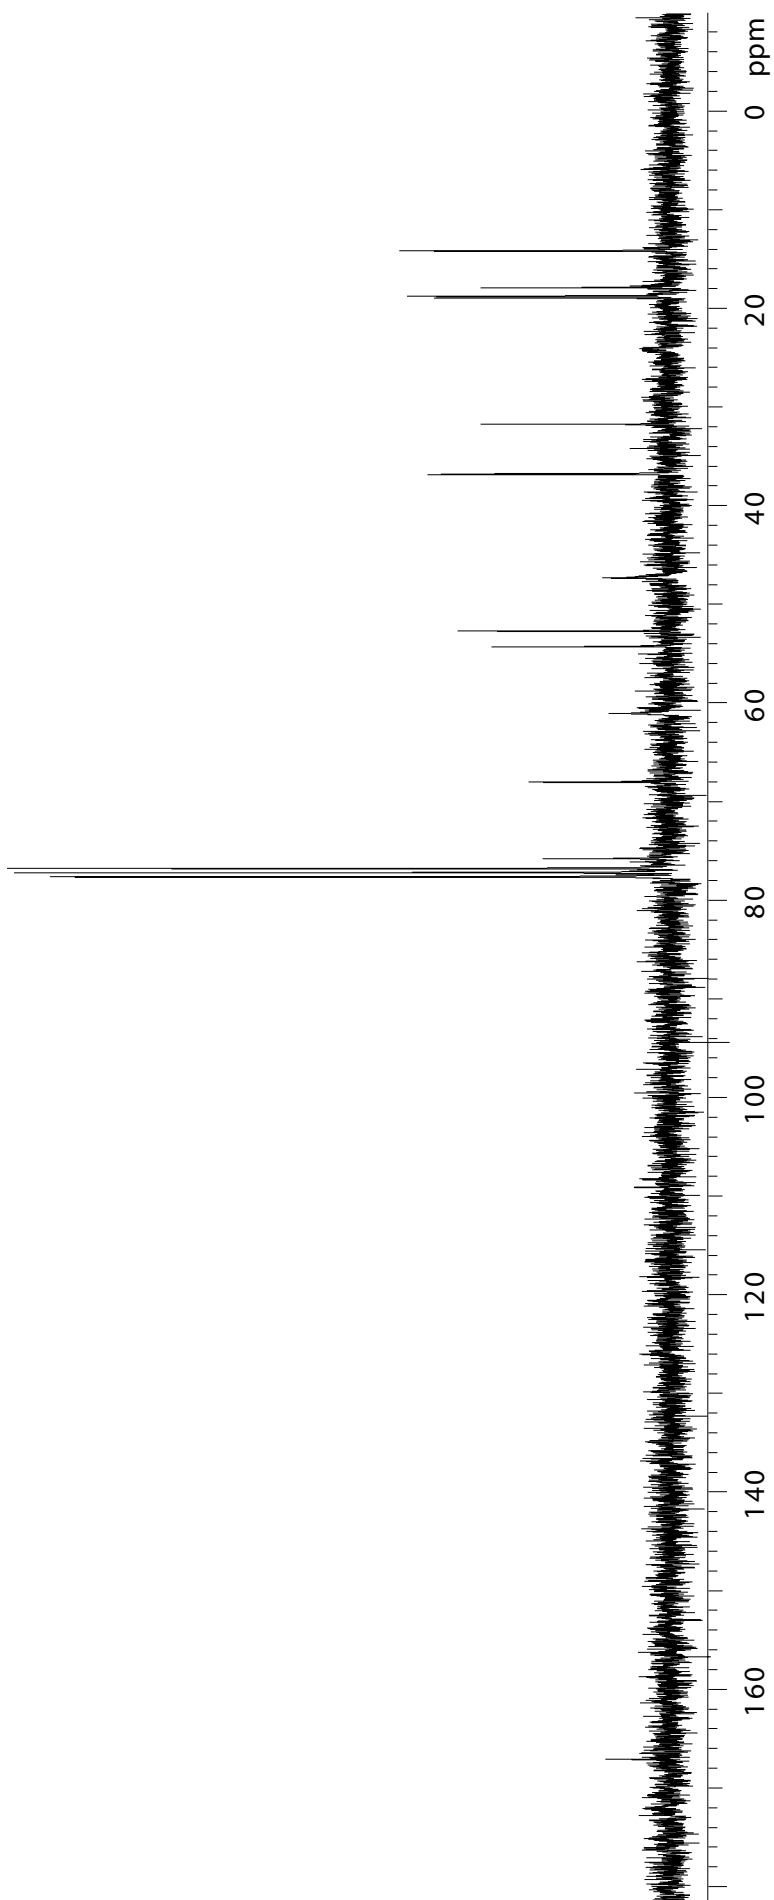

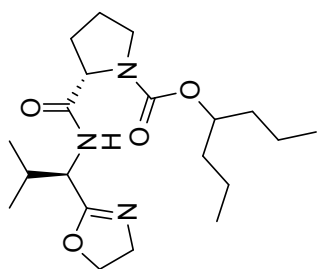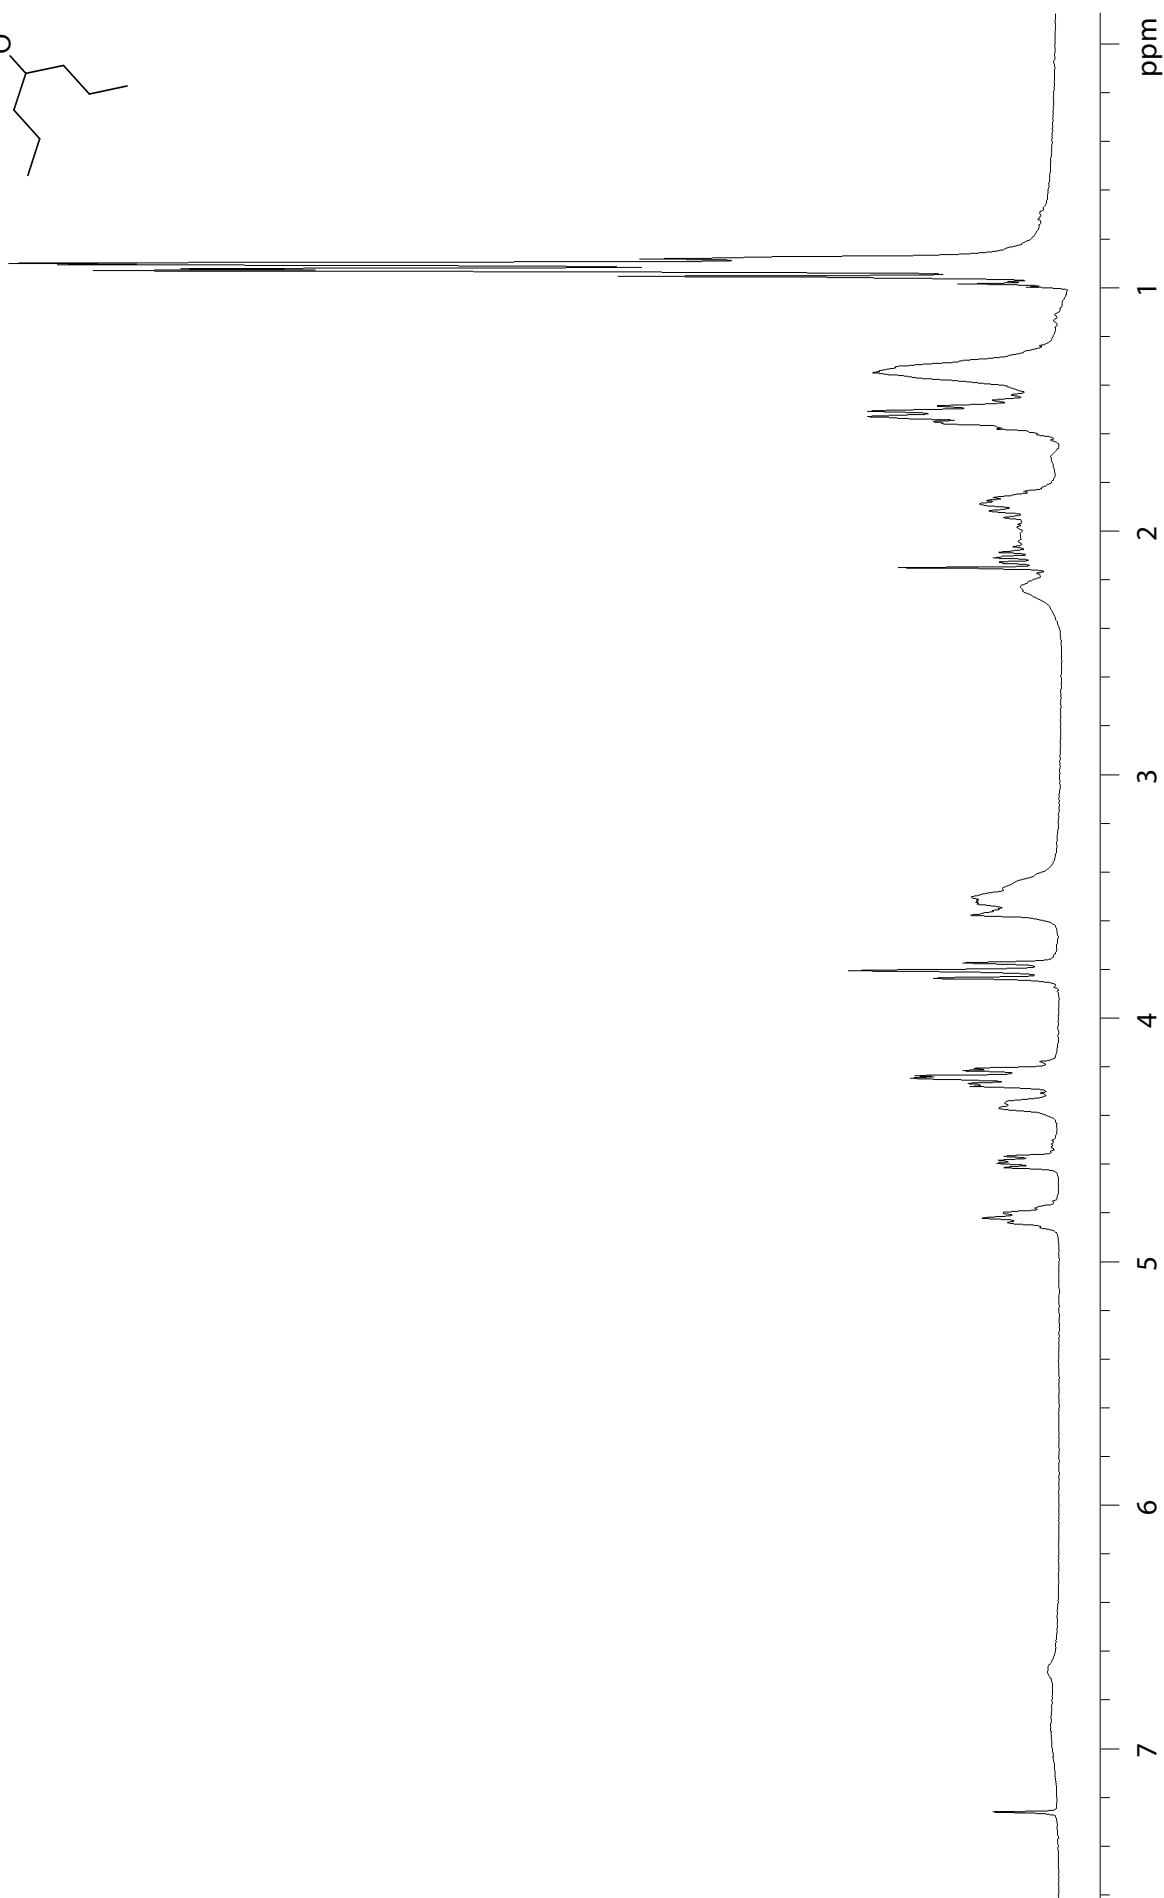



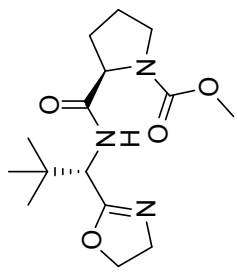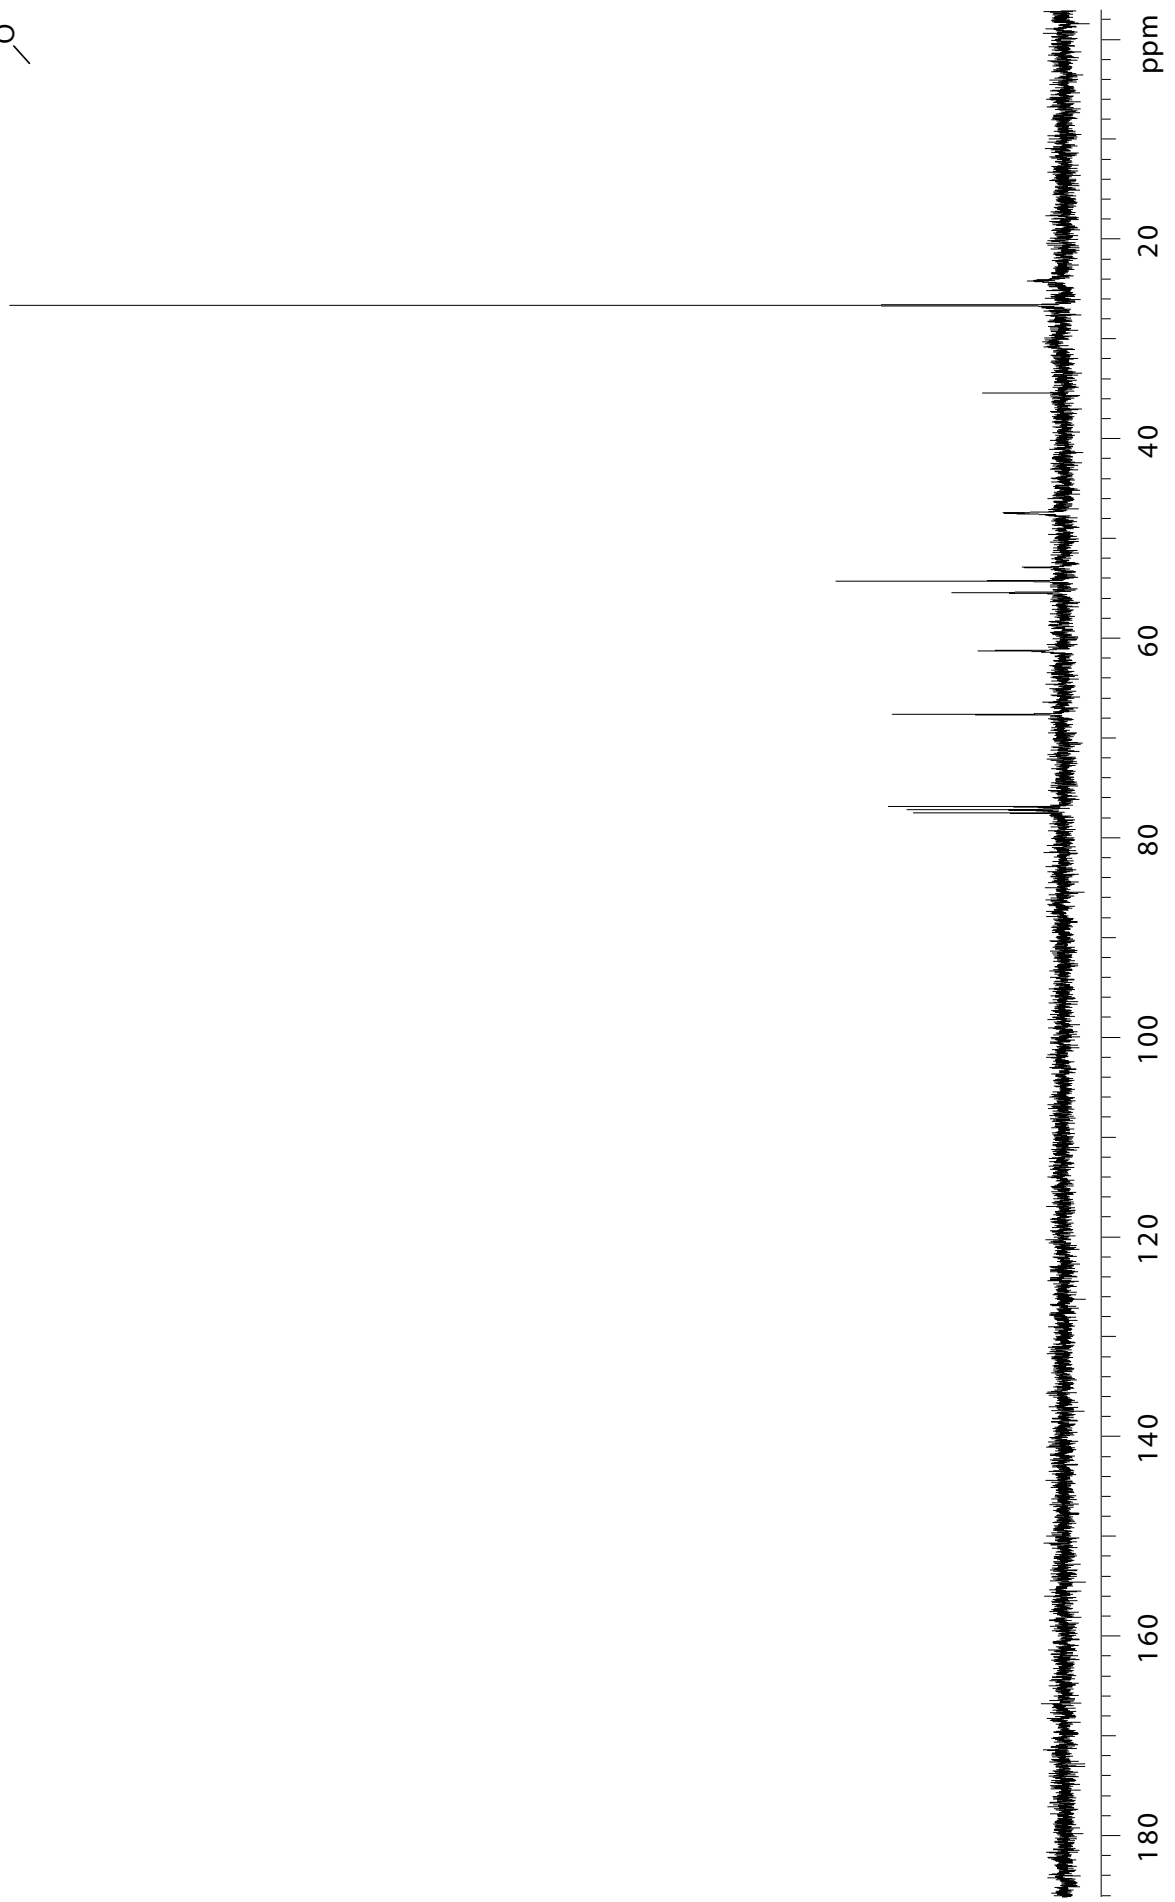

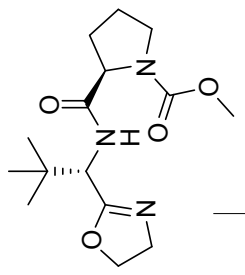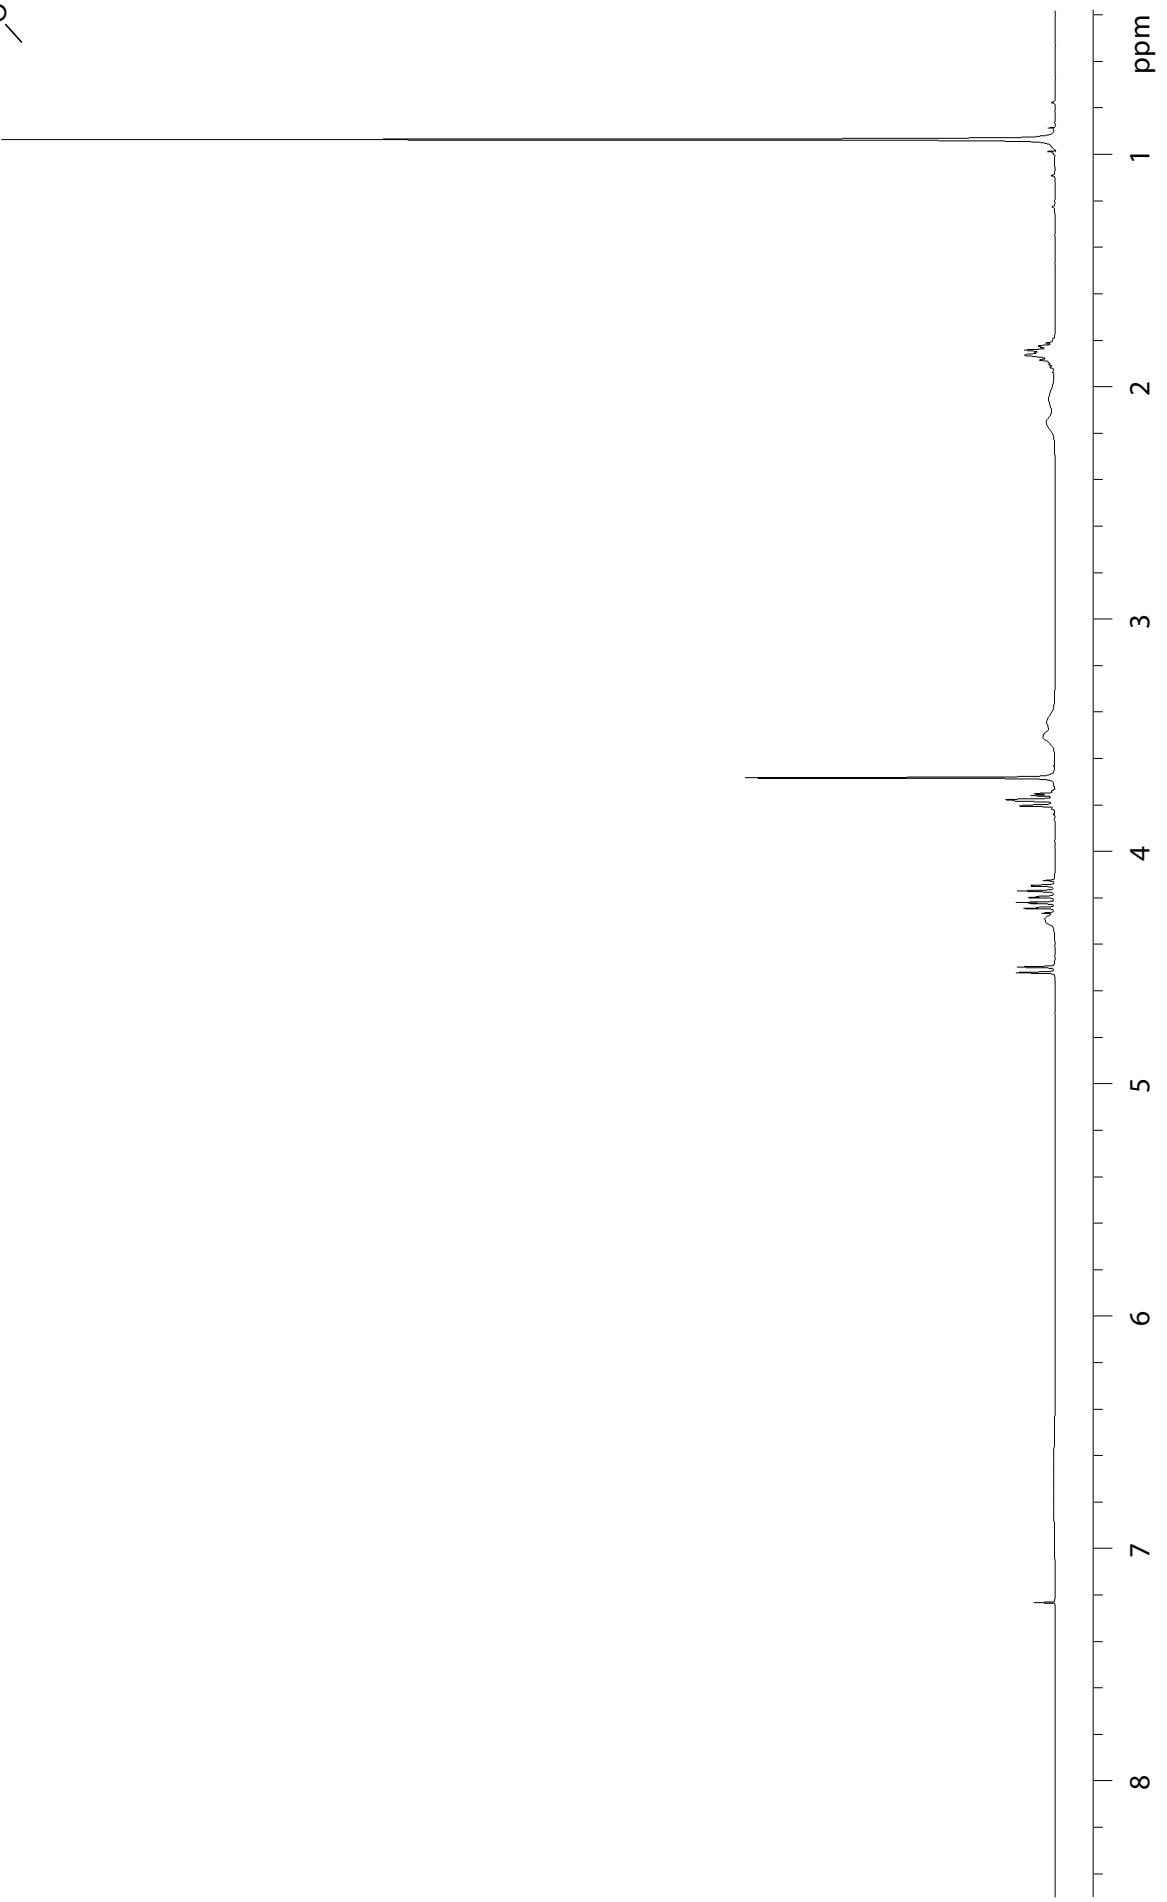

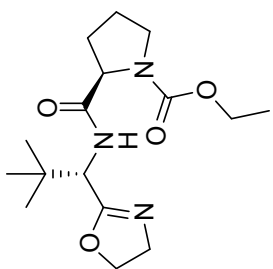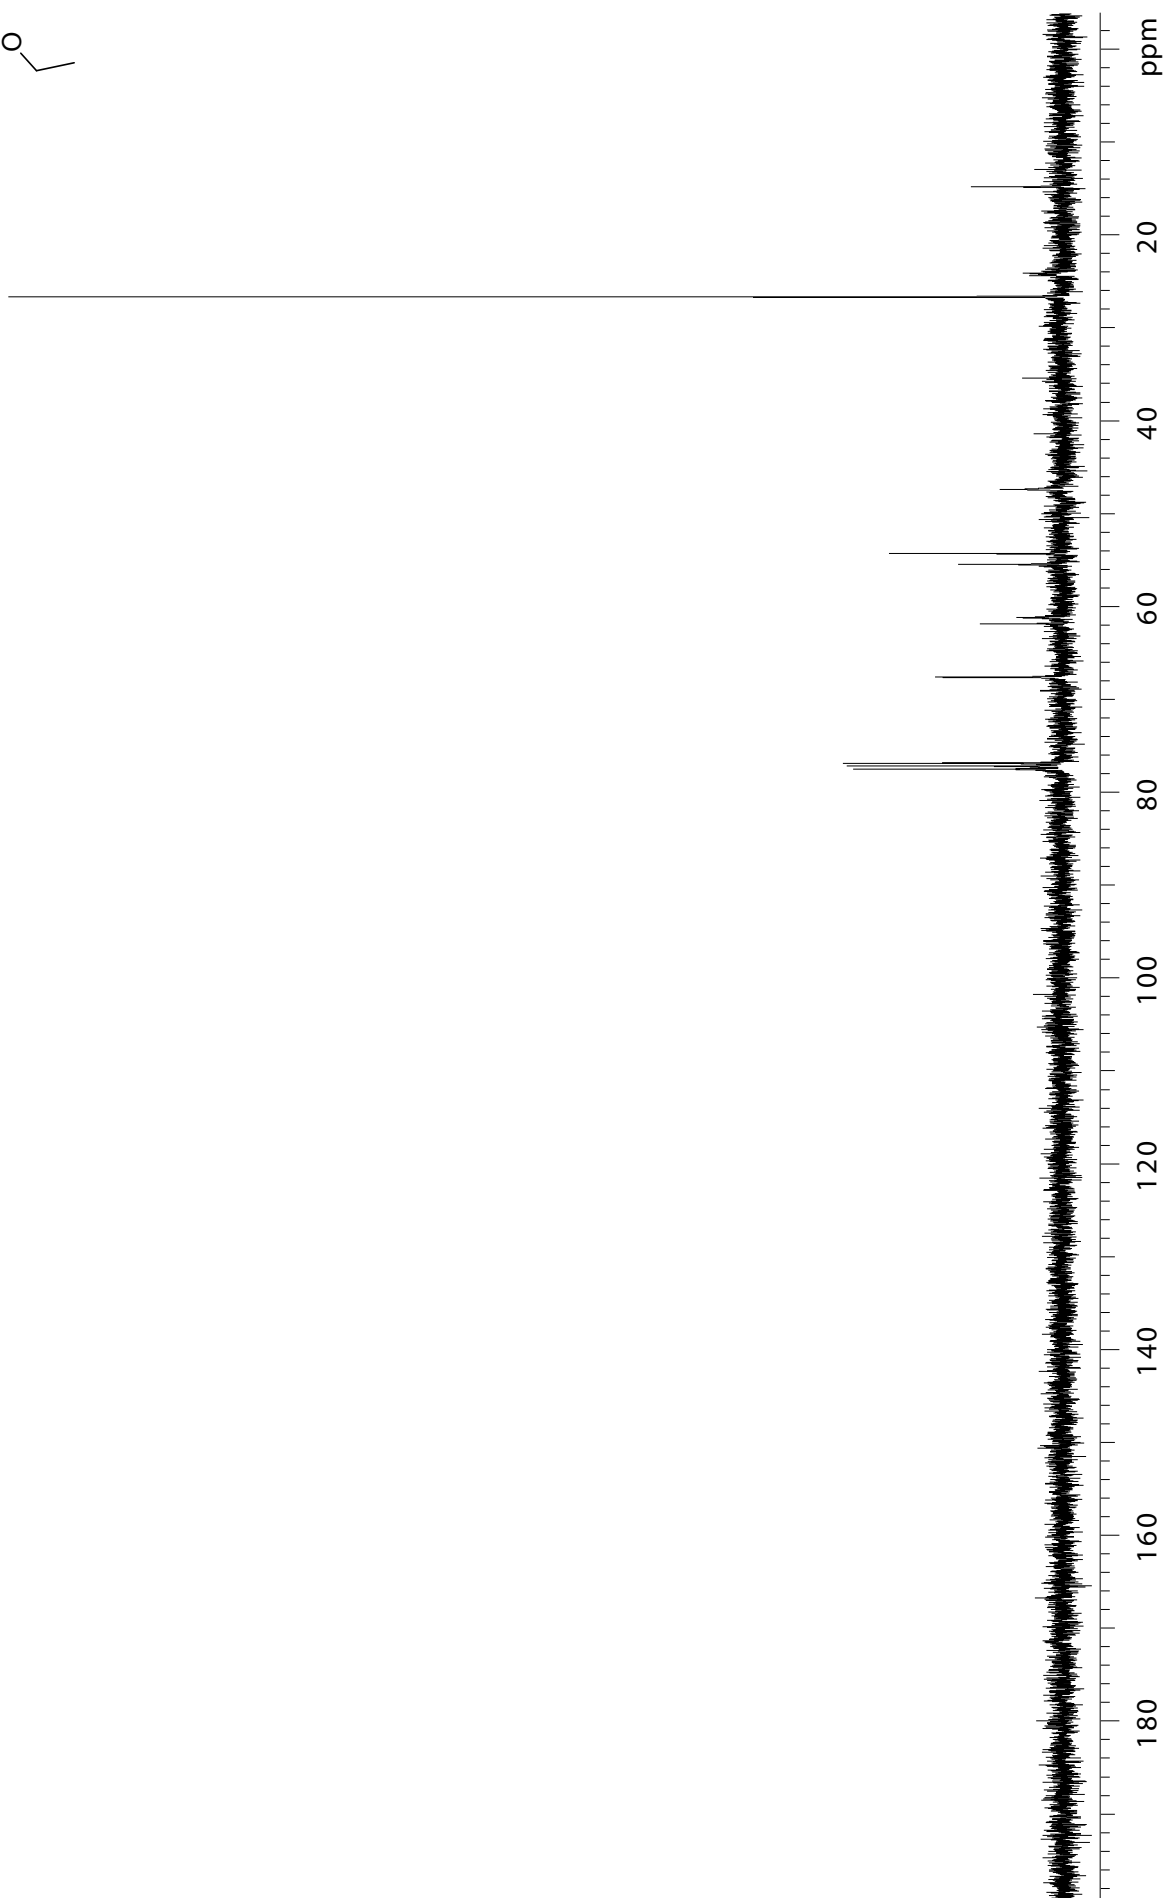

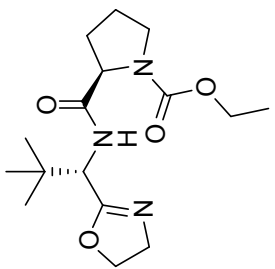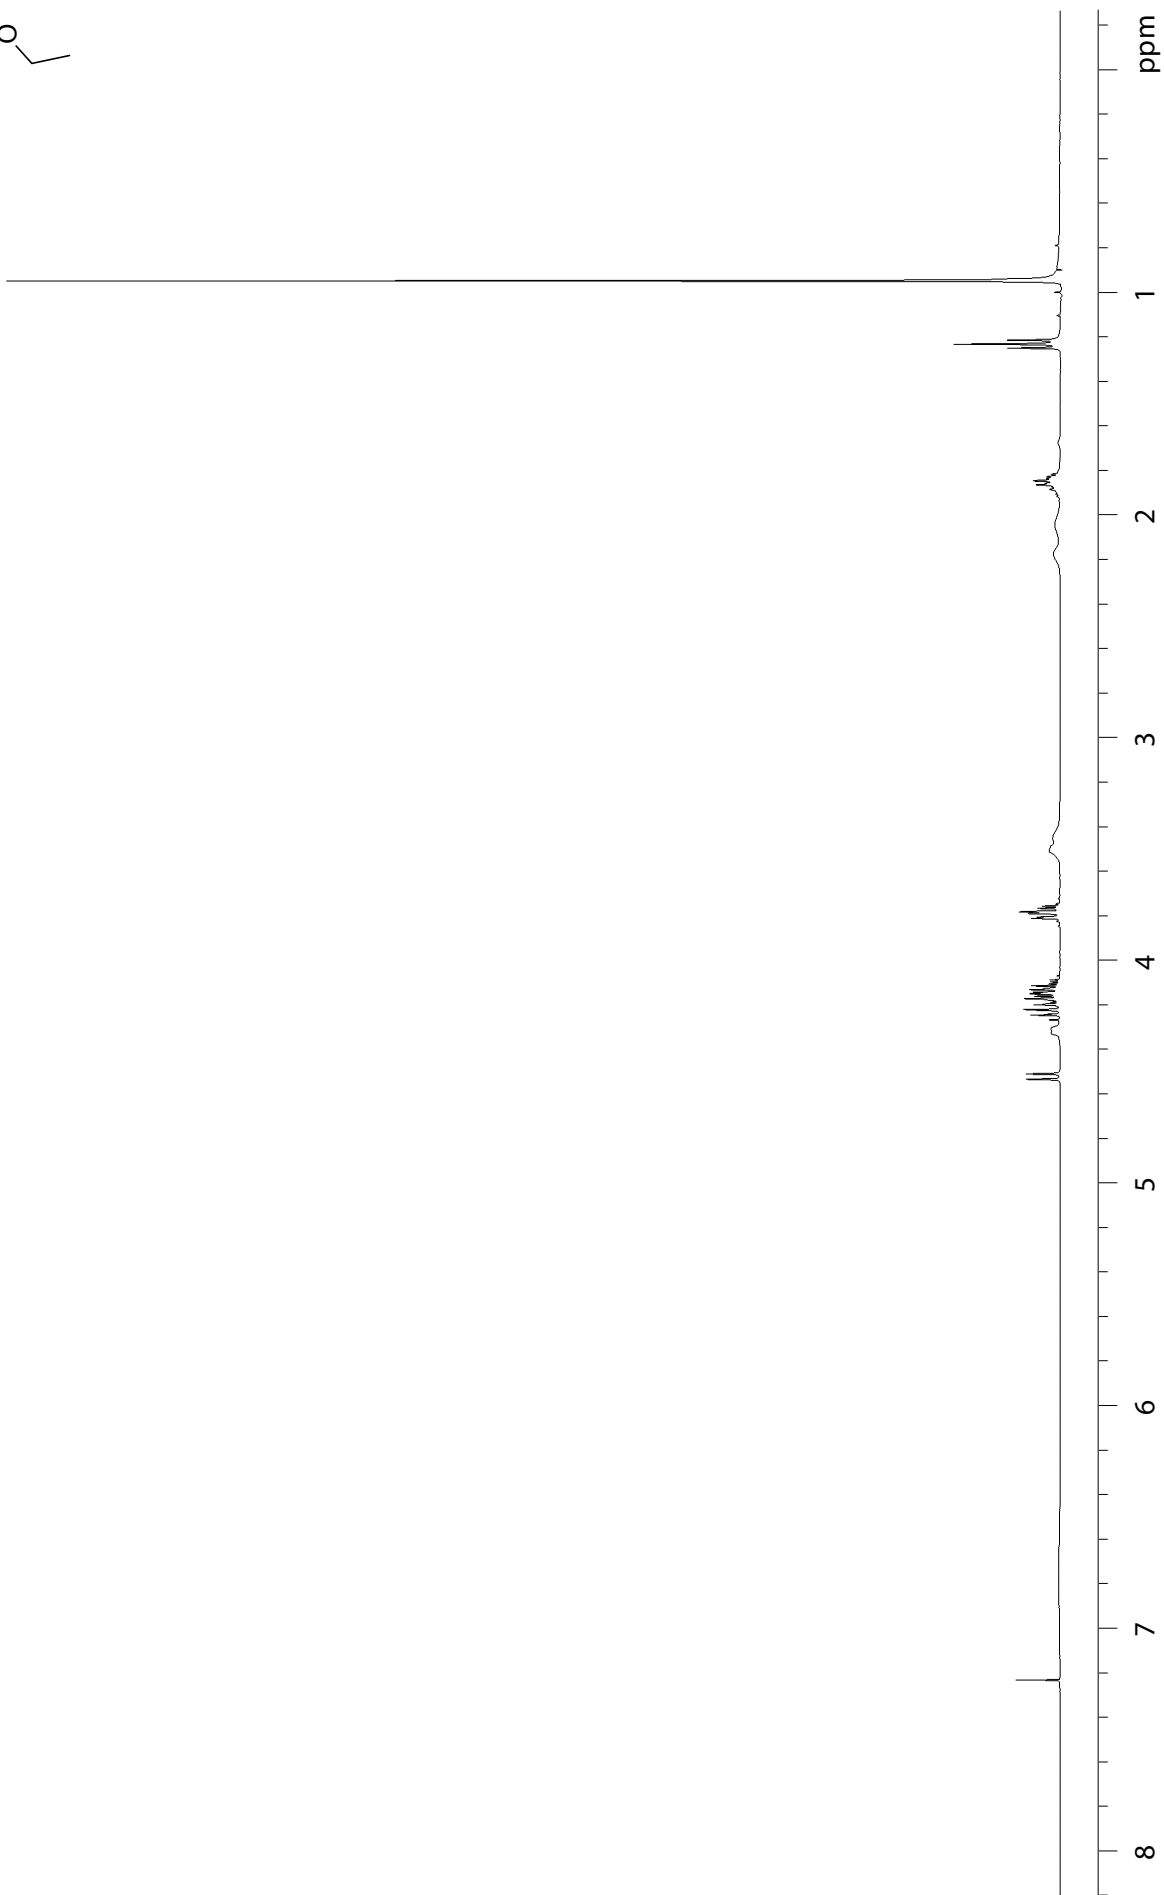

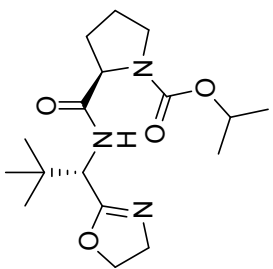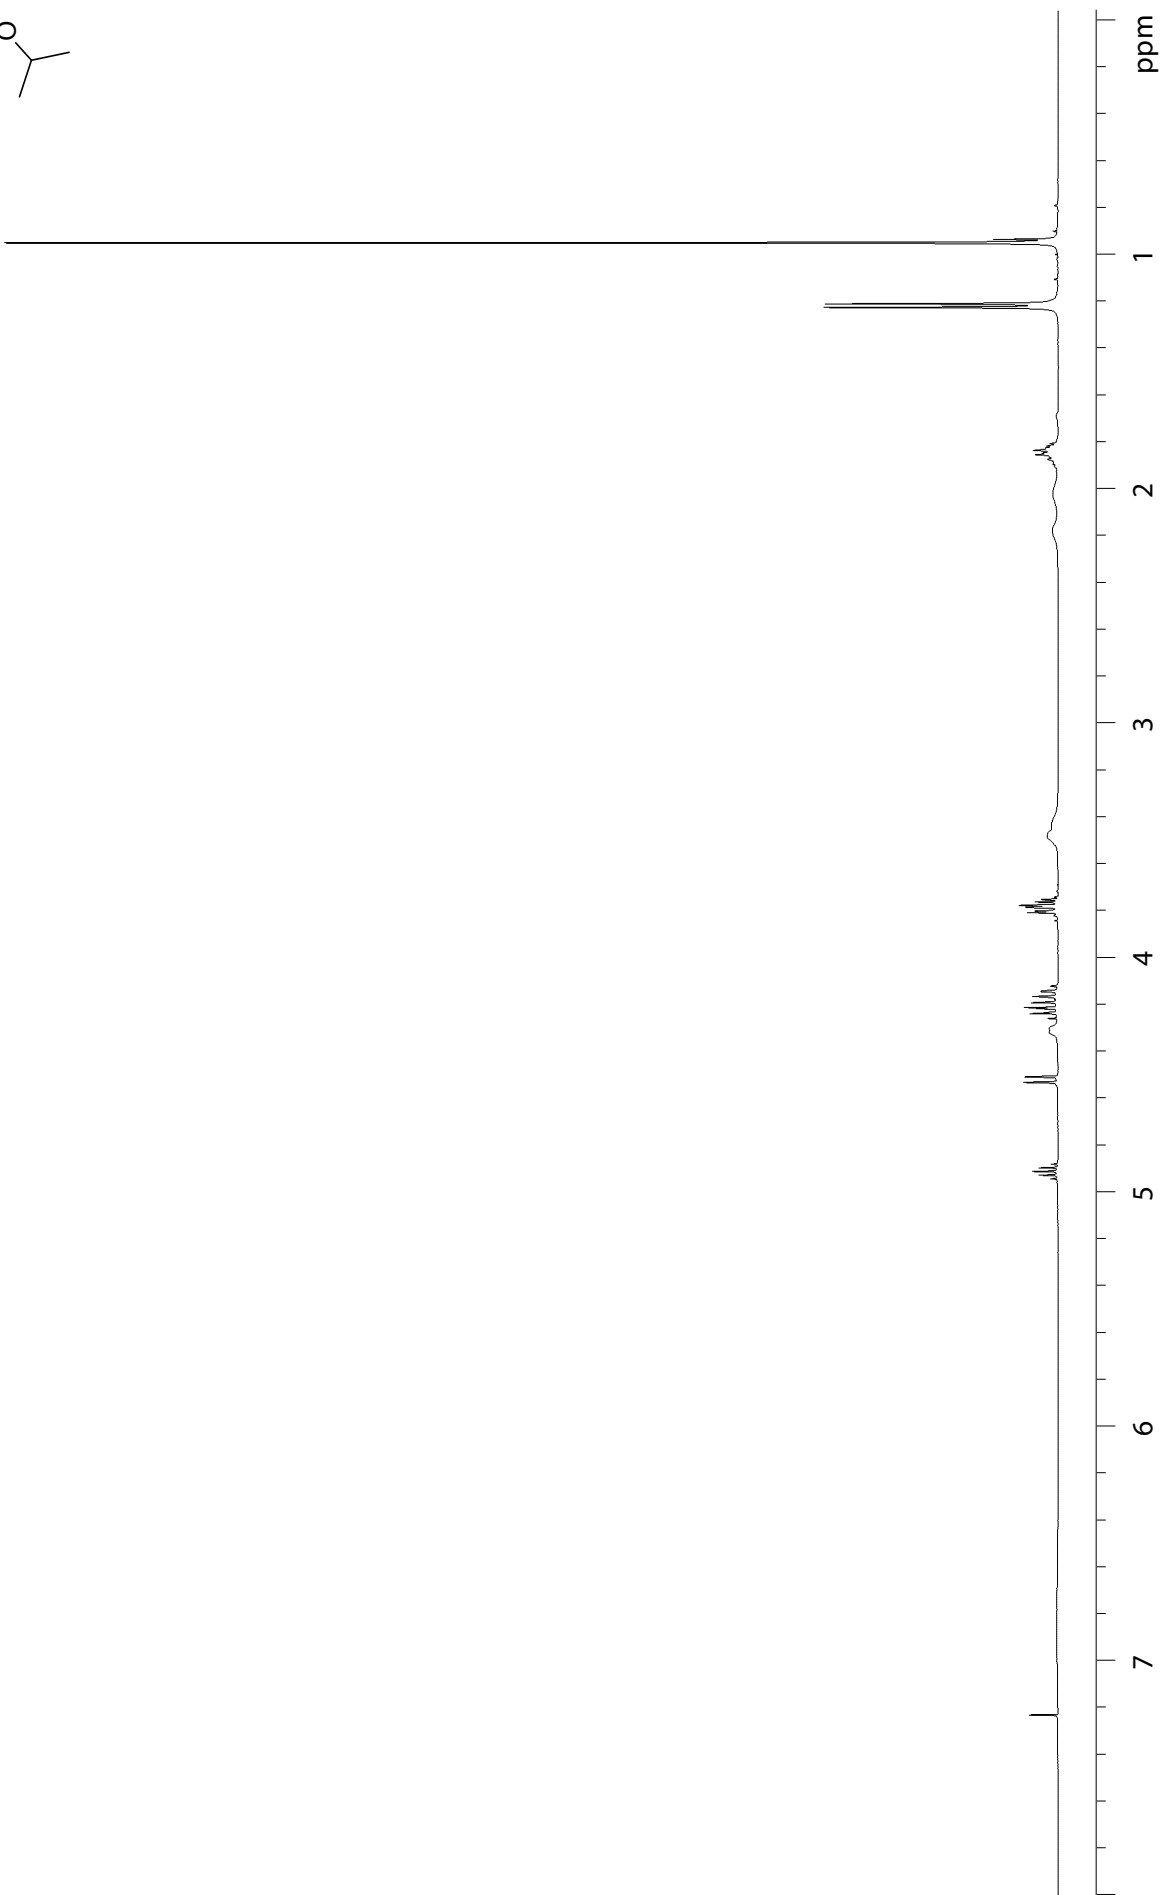

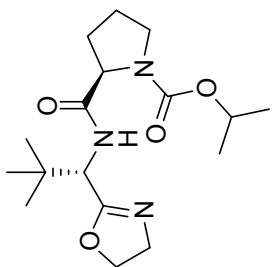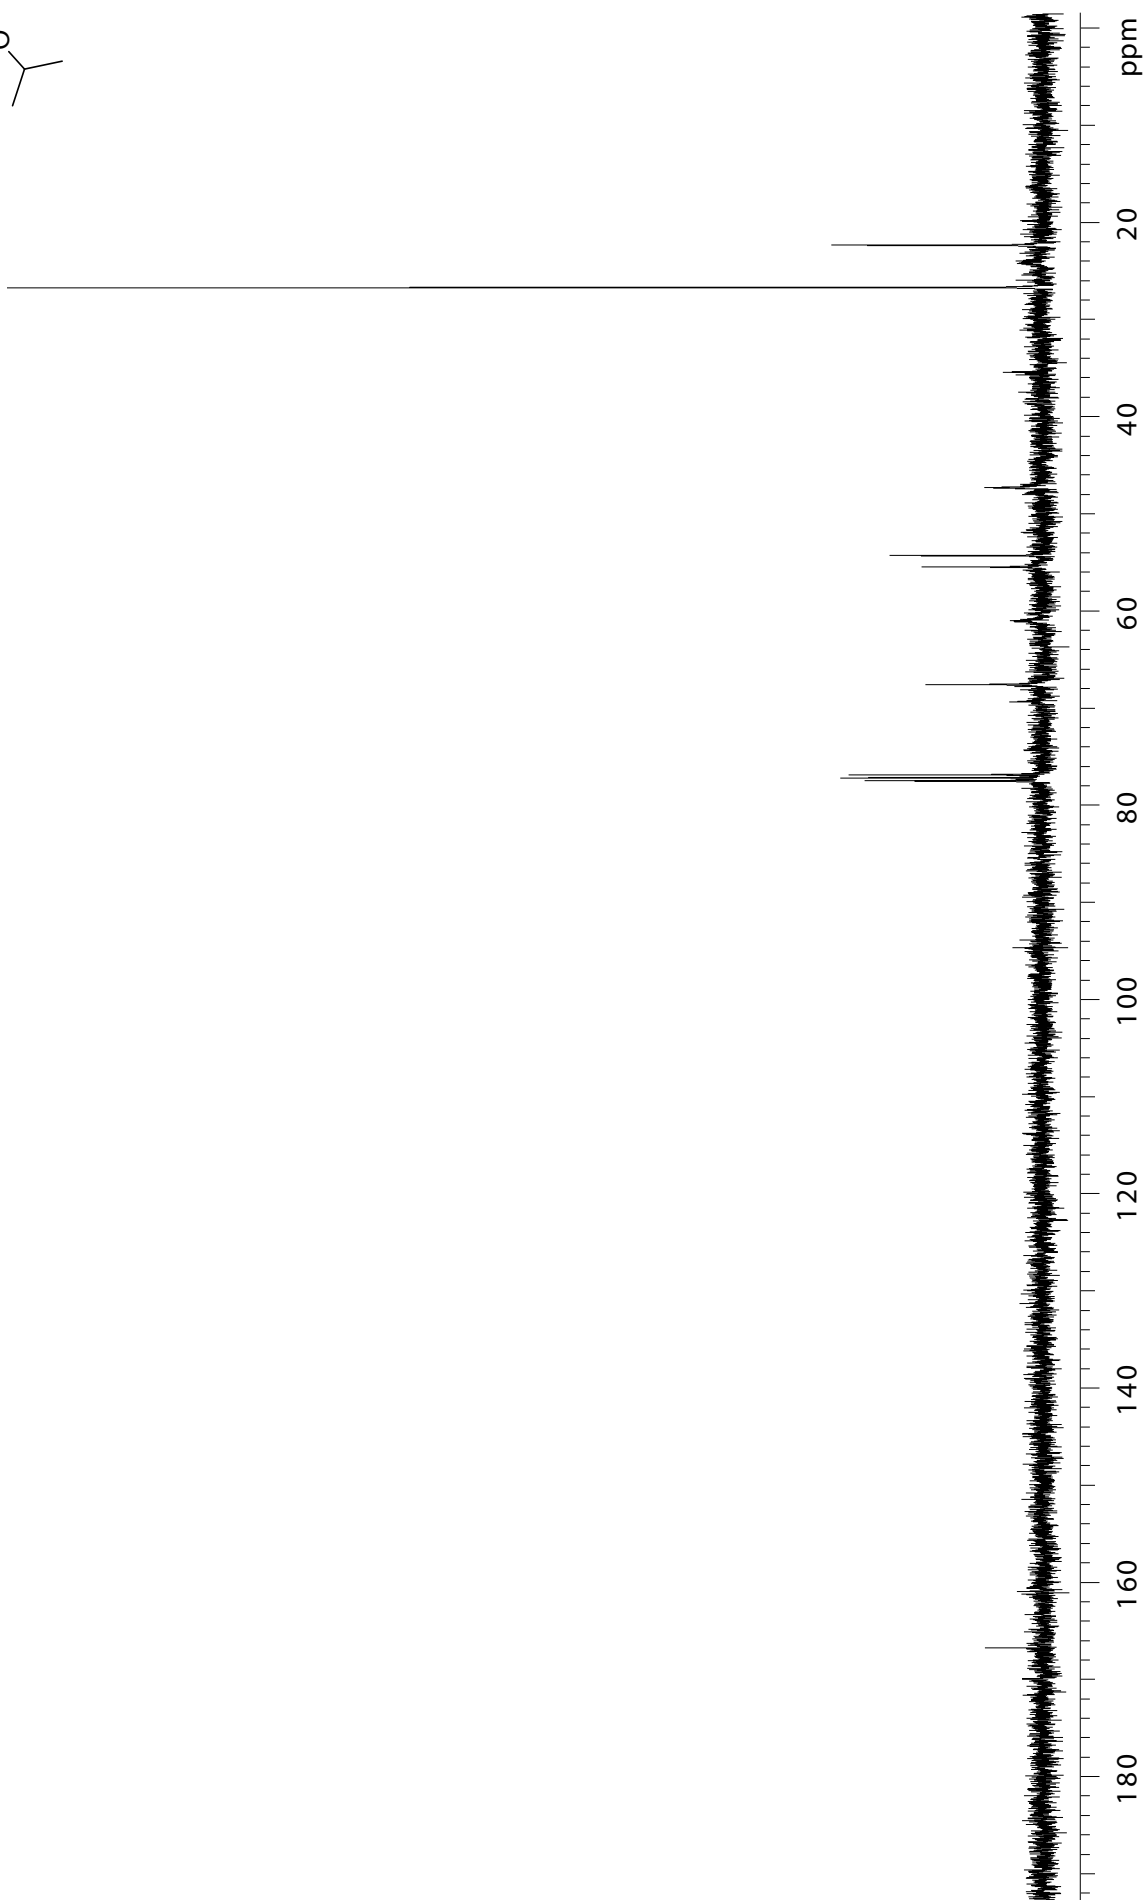

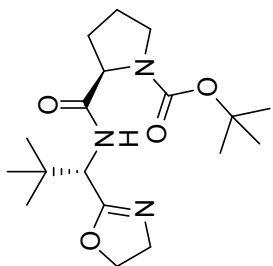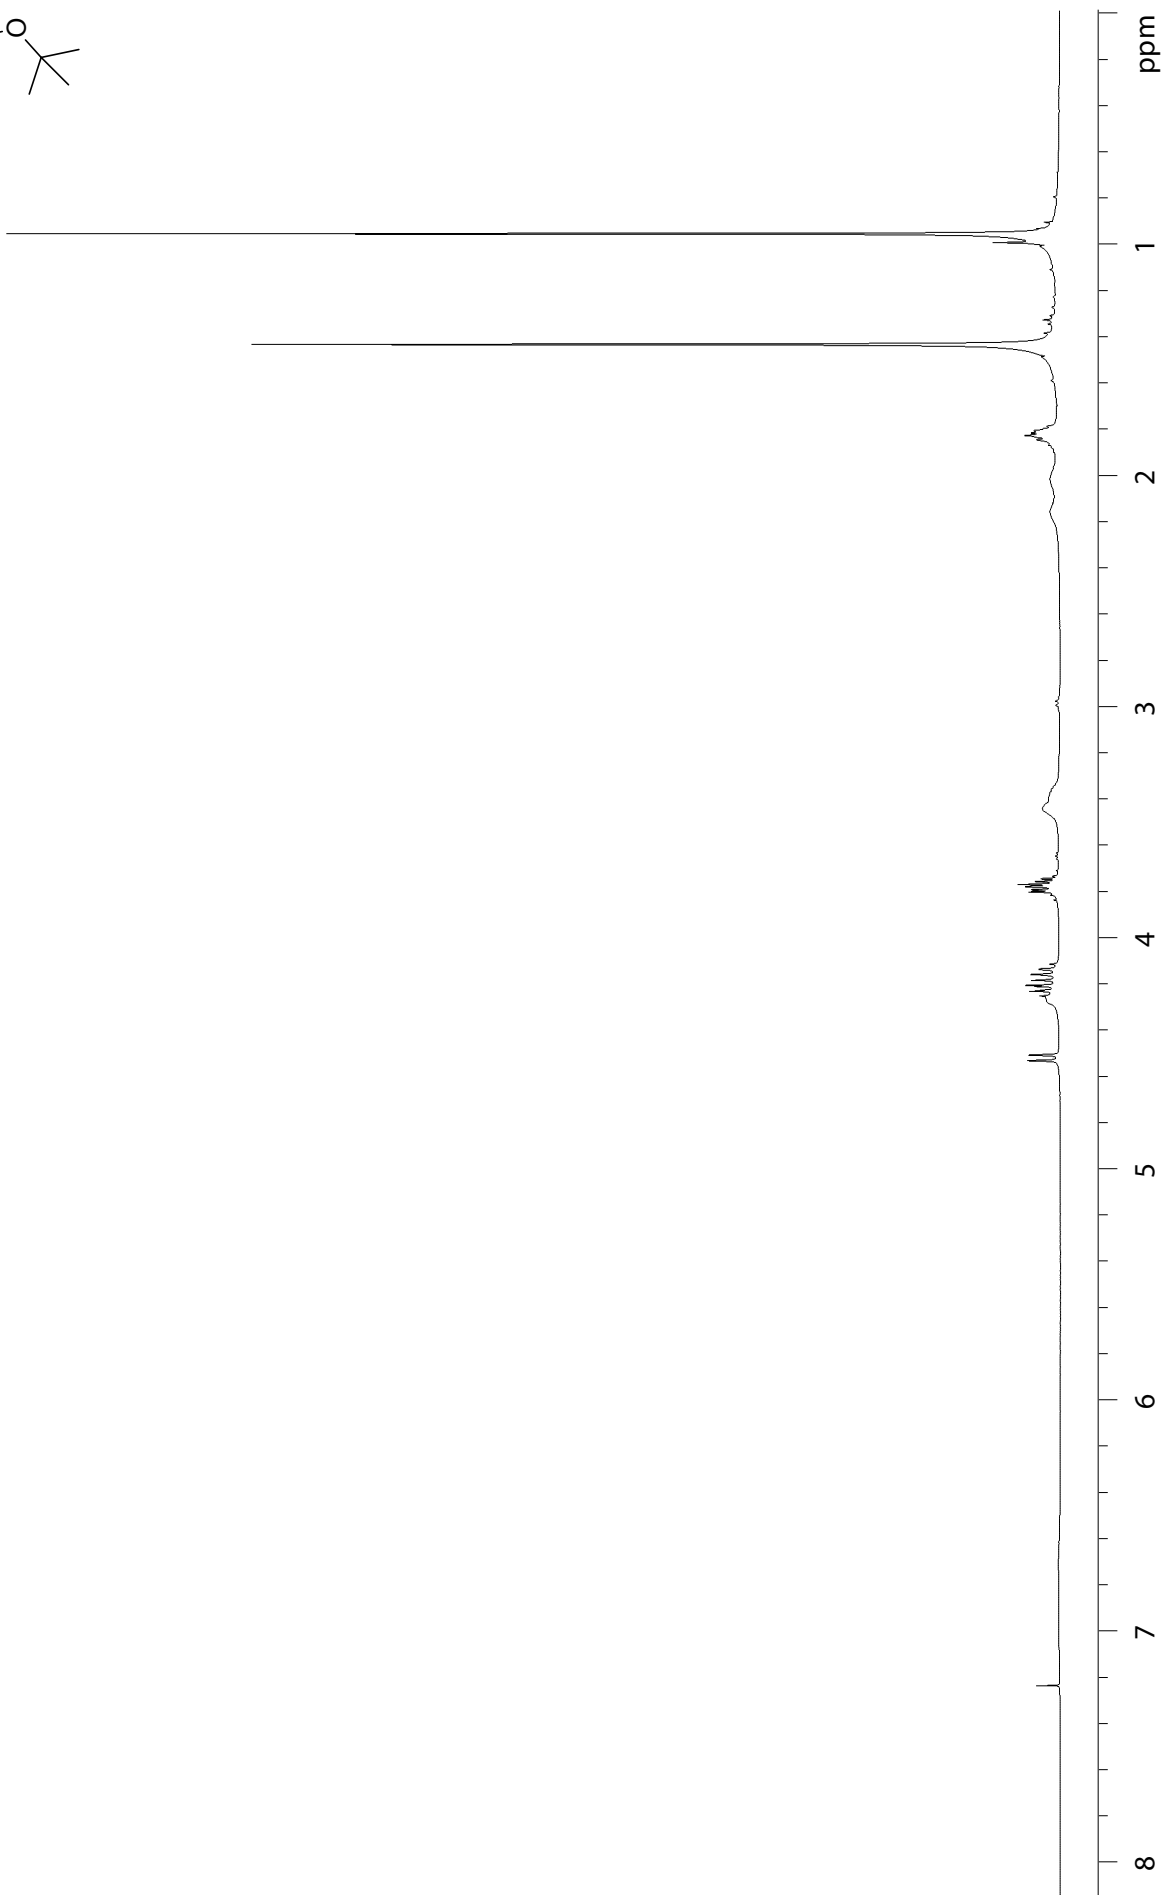

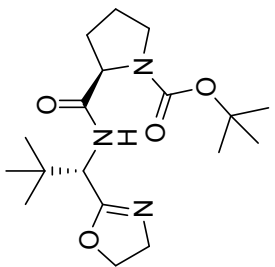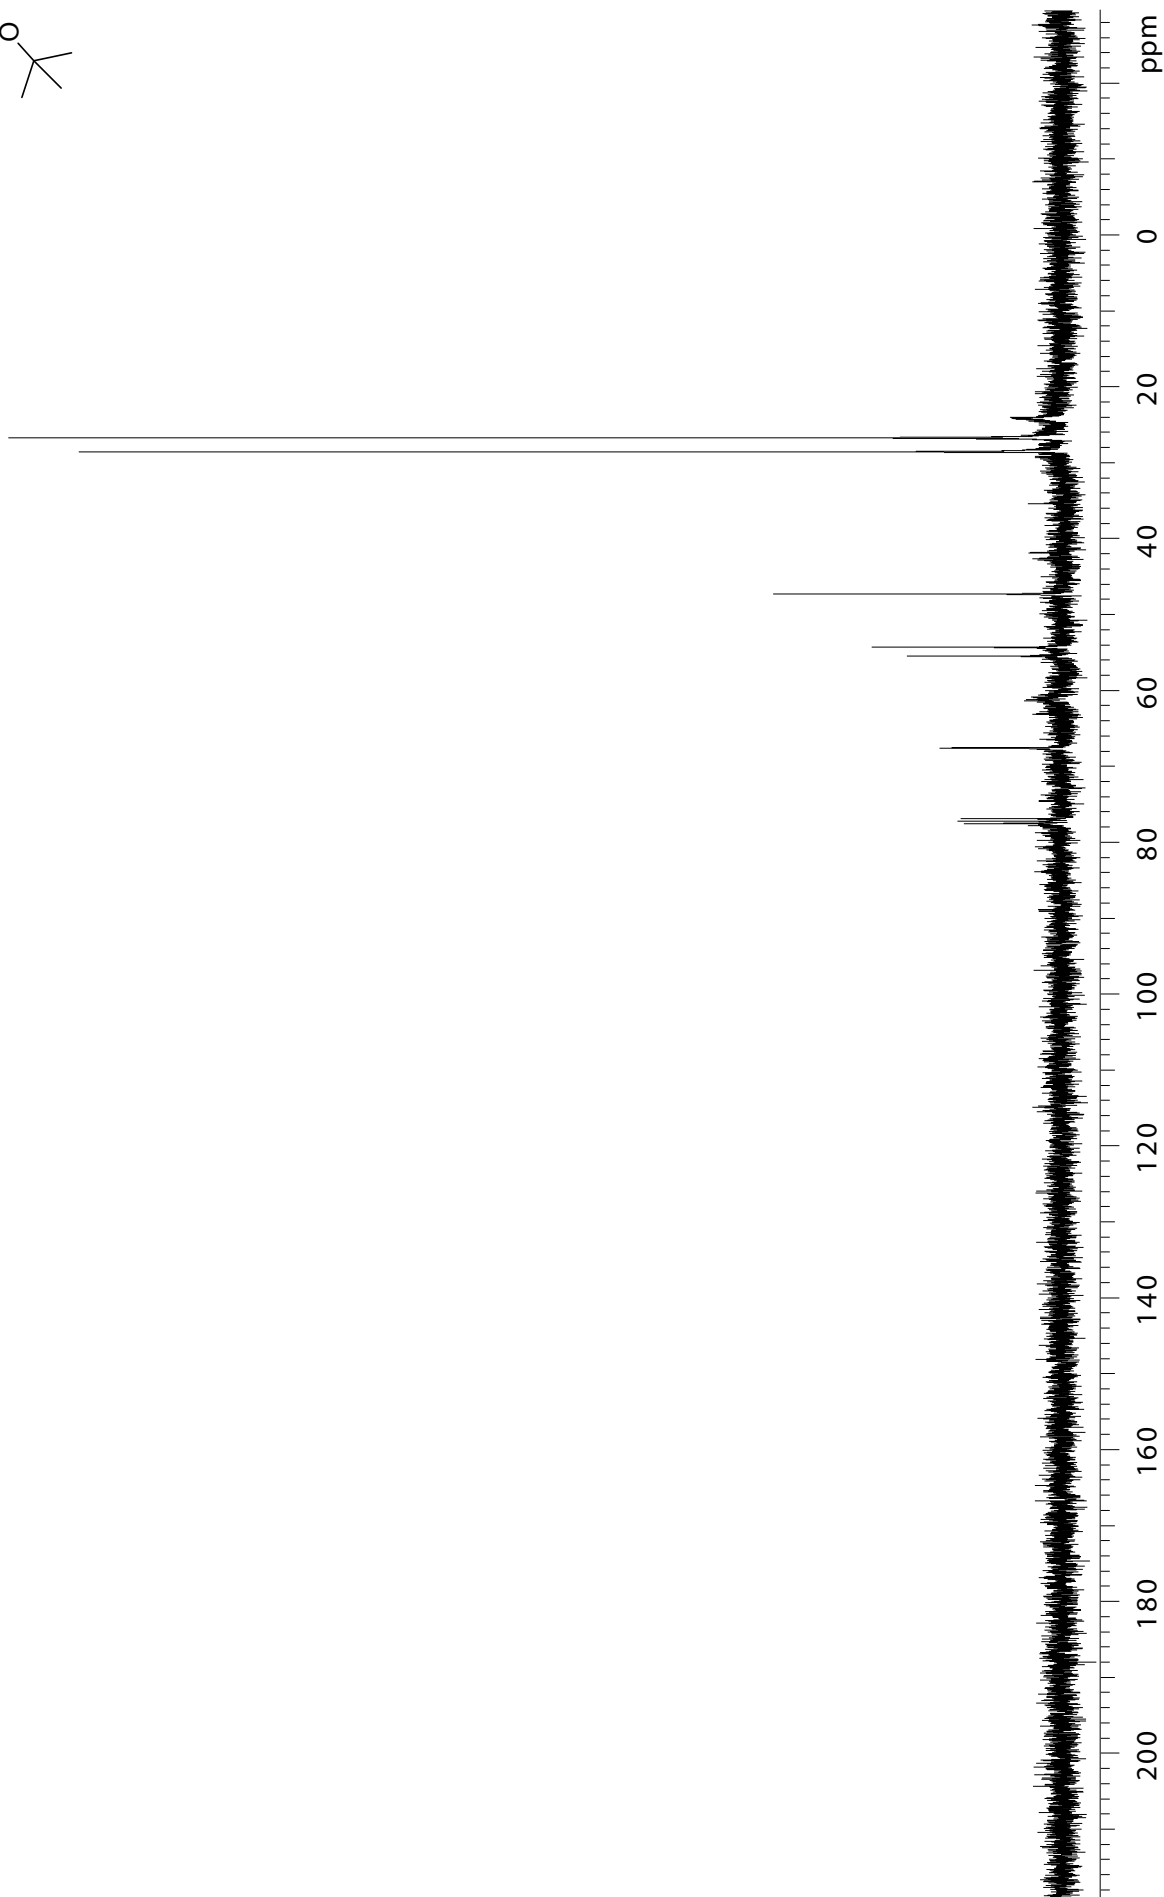



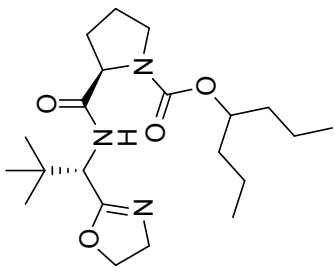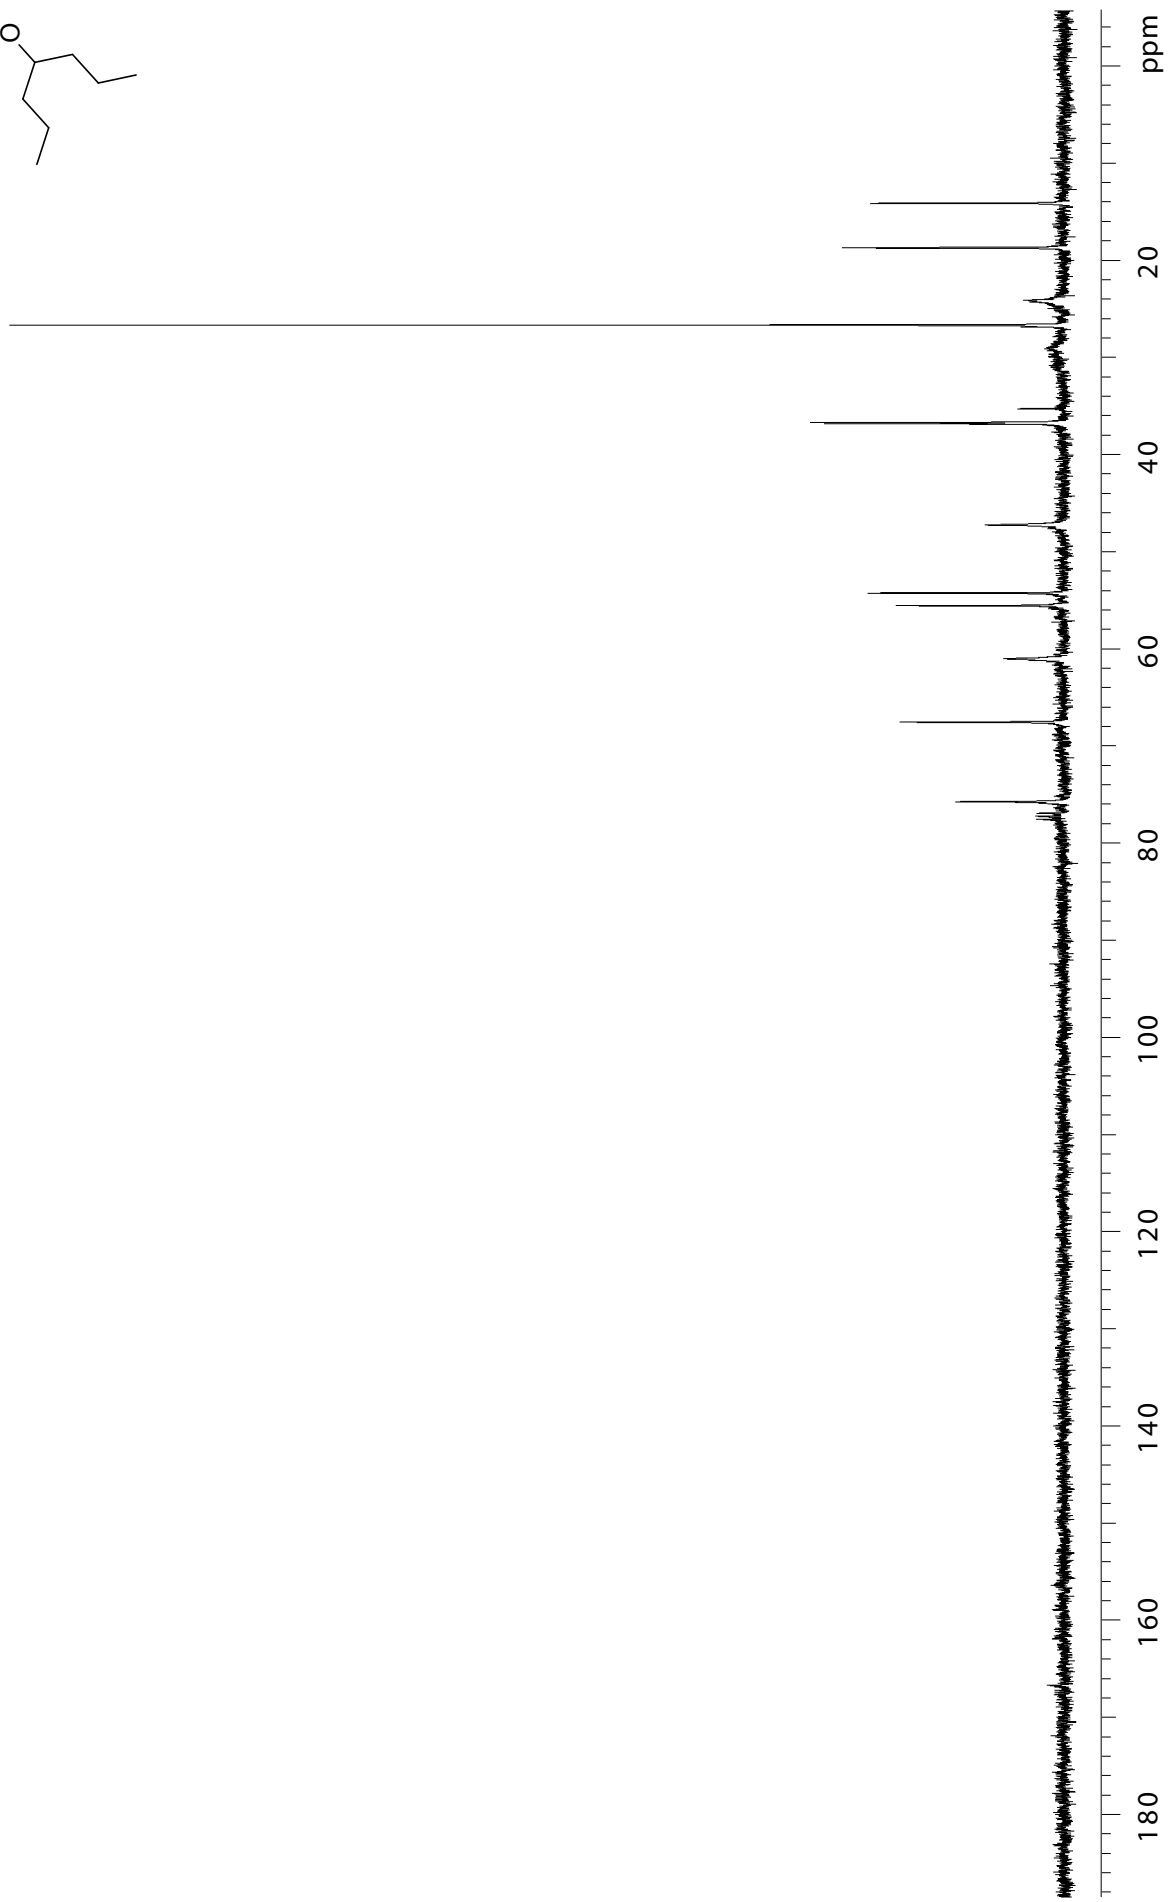

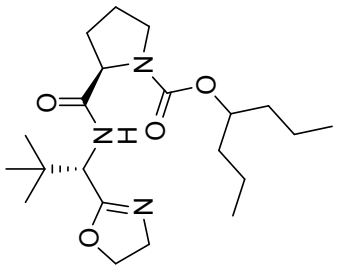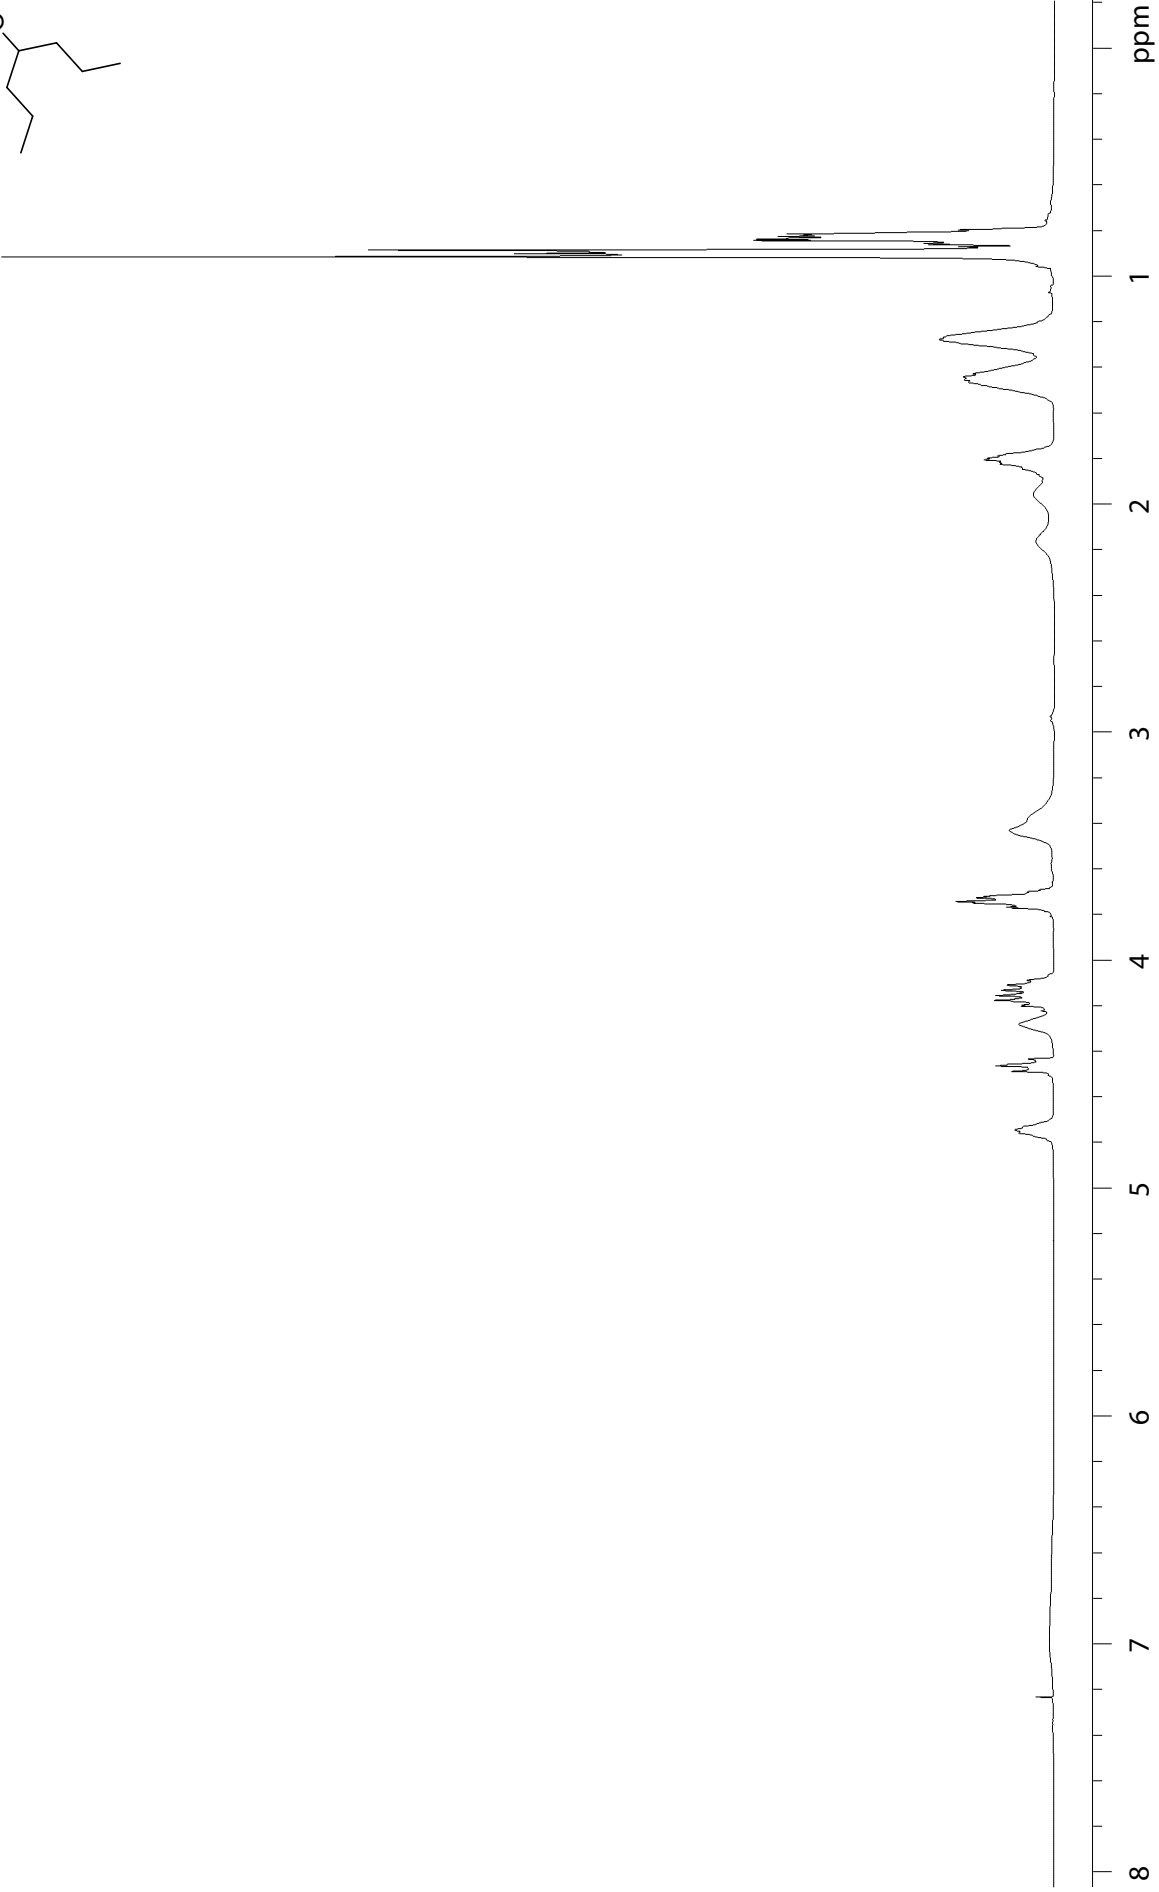

Supplement: 1013331108_Appendix.pdf [file 1013331108_Appendix.pdf]
